# Supplementary material for: Theoretical investigations into the nucleation of silica growth in basic solution part I – ab Initio studies of the formation of trimers and tetramers
Source: Royal Society of Chemistry journal article supplement (doi:10.1039/c3cp43399d), 2013-01-01
Supplement: c3cp43399d.pdf [file c3cp43399d.pdf]

## Supplementary Information

Listed below are the Cartesian coordinates of all fully hydrated silicate structures (minima and saddle points) discussed in this work. All minima have been fully optimized at the HF/6-31G(d) level of theory. Transition states have been located as the maxima of constrained internal coordinate scans, also performed at the HF/6-31G(d) level of theory, where the constrained coordinates were pertinent Si-O bonds between hydrogen-bonded oligomers (during Si-O bond formation processes) or Si-OH bonds during dehydration reactions.

Only trimerisation and tetramerization reactions are considered here; dimerization reactions were considered in our previous works.<sup>1</sup>

- (1) McIntosh, G. J. *Phys. Chem. Chem. Phys.* **2012**, *14*, 996.

**3R-1**

**3TS-2**

| Atom | x         | y         | z         | Atom | x        | y        | z        |
|------|-----------|-----------|-----------|------|----------|----------|----------|
| Si   | -0.246612 | 1.525078  | -0.746028 | Si   | -0.75204 | 0.114339 | -1.33409 |
| Si   | 2.38387   | -1.967041 | -1.250381 | Si   | 2.782971 | -0.14637 | -0.6268  |
| O    | 2.643921  | -0.855525 | -0.089823 | O    | 2.630989 | 1.460717 | -0.96085 |
| H    | 1.88922   | -0.294559 | 0.140489  | H    | 1.84625  | 1.58801  | -1.48212 |
| O    | 1.827207  | -1.287048 | -2.619161 | O    | 3.094229 | -1.20554 | -1.85131 |
| H    | 1.200935  | -0.567885 | -2.569889 | H    | 2.313875 | -1.28529 | -2.39096 |
| O    | 1.370065  | -3.162482 | -0.734638 | O    | 1.881059 | -0.84551 | 0.599689 |
| H    | 0.547755  | -2.897255 | -0.32236  | H    | 1.012178 | -1.06998 | 0.281932 |
| O    | 3.805873  | -2.708403 | -1.561202 | O    | 4.246557 | -0.04405 | 0.157621 |
| H    | 3.780836  | -3.658475 | -1.620497 | H    | 4.626632 | -0.87944 | 0.394632 |
| O    | -1.803438 | 1.950088  | -0.594974 | O    | -1.15204 | -0.79177 | 0.013795 |
| O    | 0.305465  | 0.504039  | 0.307105  | O    | 0.762262 | -0.12739 | -1.65412 |
| O    | -0.041249 | 0.908344  | -2.2767   | O    | -1.77209 | -0.24268 | -2.55269 |
| H    | -0.541552 | 1.316543  | -2.969486 | H    | -2.70264 | -0.05385 | -2.46858 |
| O    | 0.512905  | 3.014614  | -0.709402 | O    | -1.1065  | 1.684049 | -0.88474 |
| H    | 1.459709  | 2.987615  | -0.732621 | H    | -0.5765  | 2.052945 | -0.17684 |
| O    | 2.710549  | -5.48975  | -1.628094 | O    | 3.991645 | -3.2071  | 0.153894 |
| H    | 2.355358  | -5.65119  | -2.491583 | H    | 3.855826 | -2.88763 | -0.73391 |
| H    | 2.066356  | -4.940853 | -1.182089 | H    | 3.216611 | -2.91965 | 0.621922 |
| O    | 5.615058  | -1.009476 | 0.307226  | O    | 3.025917 | 3.4325   | 0.990458 |
| H    | 4.720711  | -0.722089 | 0.46215   | H    | 3.015863 | 2.815931 | 0.254358 |
| H    | 5.507368  | -1.671373 | -0.366063 | H    | 3.694958 | 3.104787 | 1.575991 |
| O    | -0.888297 | -1.944216 | 0.596744  | O    | -4.63262 | 0.275937 | -1.88888 |
| H    | -0.841876 | -2.106343 | 1.530518  | H    | -4.61216 | 1.147503 | -1.50873 |
| H    | -0.521205 | -1.054036 | 0.476179  | H    | -4.61407 | -0.30643 | -1.1355  |
| Si   | -3.295377 | 2.040737  | 0.038946  | O    | 0.182936 | 2.80079  | 1.46555  |
| O    | -3.693037 | 3.613373  | 0.12629   | H    | 1.058573 | 3.164443 | 1.344884 |
| H    | -2.998138 | 4.236679  | -0.072922 | H    | 0.302374 | 2.063104 | 2.056772 |
| O    | -4.394031 | 1.281087  | -0.886653 | O    | 0.814076 | 0.271064 | 2.898893 |
| H    | -4.41848  | 0.333025  | -0.787934 | H    | 1.319523 | 0.126839 | 3.687024 |
| O    | -3.311975 | 1.288404  | 1.495632  | H    | 1.327786 | -0.08577 | 2.165777 |
| H    | -2.523713 | 1.29965   | 2.036369  | Si   | -2.2958  | -1.29545 | 1.034443 |
| O    | -1.272919 | 5.245513  | -0.227016 | O    | -3.68293 | -0.45405 | 0.840743 |
| H    | -0.653894 | 4.556194  | -0.468344 | H    | -3.64813 | 0.499234 | 0.834624 |
| H    | -1.019055 | 5.527249  | 0.641025  | O    | -2.75618 | -2.84243 | 0.770018 |
| O    | -3.845445 | -1.378246 | 0.347146  | H    | -2.21491 | -3.51086 | 1.163292 |
| H    | -3.795338 | -0.734596 | 1.047841  | O    | -1.6915  | -1.21166 | 2.549124 |
| H    | -2.95179  | -1.696278 | 0.245924  | H    | -0.90245 | -0.69641 | 2.696631 |
| O    | -0.756648 | 0.934121  | 2.783901  | O    | -3.62174 | 2.342616 | 0.04731  |
| H    | -0.19819  | 1.453779  | 3.344437  | H    | -3.57471 | 3.123948 | 0.581324 |
| H    | -0.271239 | 0.790047  | 1.957597  | H    | -2.74937 | 2.229329 | -0.3482  |

**3R-2**

| Atom | x        | y        | z        |
|------|----------|----------|----------|
| Si   | 0.579176 | -0.49443 | 1.017135 |
| Si   | -2.47751 | 0.64152  | 0.181448 |
| O    | -1.88395 | 1.786428 | 1.255091 |
| H    | -1.06934 | 1.578738 | 1.68816  |
| O    | -3.35582 | -0.63907 | 0.795949 |
| H    | -2.86994 | -1.30244 | 1.273141 |
| O    | -2.02321 | 0.690527 | -1.43571 |
| H    | -1.15519 | 0.349769 | -1.59069 |
| O    | -3.8621  | 1.554399 | -0.20941 |
| H    | -4.47825 | 1.602706 | 0.505977 |
| O    | 1.618547 | -1.01004 | -0.15254 |
| O    | -0.89411 | -0.43061 | 0.45275  |
| O    | 0.670758 | -1.54352 | 2.275472 |
| H    | 1.434614 | -1.45915 | 2.837633 |
| O    | 1.148118 | 0.944865 | 1.583658 |
| H    | 1.249156 | 1.628619 | 0.914642 |
| O    | 3.091344 | -0.17673 | 3.380909 |
| H    | 2.557527 | 0.488317 | 2.949168 |
| H    | 3.834212 | -0.31522 | 2.808757 |
| O    | 1.162735 | 2.6252   | -0.70616 |
| H    | 0.326545 | 3.089379 | -0.77712 |
| H    | 1.164312 | 1.9729   | -1.39928 |
| Si   | 1.755486 | -1.24078 | -1.73599 |
| O    | 3.318653 | -1.34656 | -2.20663 |
| H    | 3.643205 | -2.22515 | -2.34459 |
| O    | 1.045079 | -2.59661 | -2.26874 |
| H    | 0.168302 | -2.81727 | -1.9417  |
| O    | 1.104519 | 0.113178 | -2.42263 |
| H    | 1.02994  | 0.121551 | -3.36717 |
| O    | -1.46686 | -2.81887 | -1.02348 |
| H    | -2.29034 | -2.67881 | -1.49046 |
| H    | -1.35401 | -2.01747 | -0.50886 |
| O    | -1.49858 | 3.820687 | -0.76154 |
| H    | -1.73824 | 3.437474 | 0.080961 |
| H    | -2.02556 | 3.315182 | -1.37156 |
| O    | -3.97549 | -1.62355 | -1.9486  |
| H    | -4.19757 | -1.46028 | -1.03481 |
| H    | -3.58607 | -0.79671 | -2.21927 |
| O    | -1.90801 | -3.12848 | 2.071679 |
| H    | -1.78785 | -3.46533 | 1.191004 |
| H    | -1.08252 | -2.7121  | 2.302668 |

**3TS-3**

| Atom | x        | y        | z        |
|------|----------|----------|----------|
| Si   | -1.14945 | -1.10872 | 0.554819 |
| Si   | 1.82689  | -1.62214 | 0.504453 |
| O    | 2.491576 | -2.90875 | 1.270121 |
| H    | 1.905493 | -3.31284 | 1.894912 |
| O    | 2.513922 | -0.18504 | 0.922596 |
| H    | 3.412066 | -0.25961 | 0.571041 |
| O    | 1.521492 | -1.82501 | -1.09168 |
| H    | 2.373752 | -1.80286 | -1.5346  |
| O    | 4.047107 | -1.35433 | -0.72245 |
| H    | 4.708272 | -2.01921 | -0.59315 |
| O    | -1.26249 | 0.512111 | 0.469267 |
| O    | 0.30275  | -1.51073 | 1.136898 |
| O    | -2.30307 | -1.68982 | 1.530164 |
| H    | -3.18958 | -1.37362 | 1.353464 |
| O    | -1.3281  | -1.75322 | -0.95038 |
| H    | -0.50331 | -1.83917 | -1.42556 |
| O    | -3.927   | -2.67306 | -1.72435 |
| H    | -3.02337 | -2.3695  | -1.63073 |
| H    | -3.95522 | -3.51044 | -1.28166 |
| O    | -4.68539 | -0.65804 | 0.284204 |
| H    | -4.66136 | -1.26246 | -0.45425 |
| H    | -4.36826 | 0.176699 | -0.05147 |
| Si   | -1.64294 | 1.84344  | -0.37277 |
| O    | -3.2302  | 1.6835   | -0.78736 |
| H    | -3.6075  | 2.401536 | -1.27599 |
| O    | -1.51779 | 3.16282  | 0.560314 |
| H    | -0.65747 | 3.573138 | 0.667983 |
| O    | -0.7734  | 1.959143 | -1.73732 |
| H    | 0.182584 | 1.954706 | -1.68513 |
| O    | 1.196105 | 3.944726 | 0.904641 |
| H    | 1.630839 | 3.538394 | 0.159152 |
| H    | 1.351844 | 3.349506 | 1.636723 |
| O    | 4.334948 | 0.760904 | -2.34406 |
| H    | 4.301679 | -0.06569 | -1.8177  |
| H    | 5.163858 | 1.166993 | -2.13356 |
| O    | 2.038179 | 1.934851 | -1.07953 |
| H    | 2.082256 | 1.260856 | -0.40402 |
| H    | 2.751105 | 1.703341 | -1.67886 |
| O    | 1.268209 | 1.684905 | 2.749225 |
| H    | 1.763616 | 1.020021 | 2.27325  |
| H    | 0.36087  | 1.414431 | 2.676601 |

### 3R-3

| Atom | x        | y        | z        |
|------|----------|----------|----------|
| Si   | -0.01054 | 0.012159 | 0.003783 |
| Si   | -0.00198 | 0.005193 | 3.068554 |
| O    | 1.552953 | 0.003986 | 3.294177 |
| H    | 2.191828 | -0.15862 | 4.924667 |
| O    | -0.75097 | -1.18558 | 3.963788 |
| H    | -1.5668  | -1.49261 | 3.593545 |
| O    | -0.72221 | 1.442022 | 3.49127  |
| H    | -0.73463 | 1.576627 | 4.434677 |
| O    | 2.475899 | -0.16001 | 5.852548 |
| H    | 2.751365 | -1.04674 | 6.038628 |
| O    | 0.69671  | 1.469081 | -0.09114 |
| O    | -0.47763 | -0.26298 | 1.519522 |
| O    | -1.29662 | -0.06466 | -0.97925 |
| H    | -1.16778 | 0.273052 | -1.86322 |
| O    | 1.082757 | -1.11957 | -0.49146 |
| H    | 1.821746 | -1.25037 | 0.112048 |
| O    | -0.19672 | 0.999973 | -3.50723 |
| H    | 0.498912 | 0.372694 | -3.67593 |
| H    | 0.262208 | 1.772508 | -3.1922  |
| O    | 3.224429 | -0.9668  | 1.300912 |
| H    | 2.711638 | -0.7307  | 2.08519  |
| H    | 3.547249 | -0.1378  | 0.962771 |
| Si   | 1.916581 | 2.45738  | -0.50209 |
| O    | 2.20459  | 2.332963 | -2.10806 |
| H    | 2.576582 | 1.51026  | -2.41054 |
| O    | 1.489625 | 3.98788  | -0.20405 |
| H    | 1.046809 | 4.137482 | 0.633215 |
| O    | 3.275814 | 1.99245  | 0.287752 |
| H    | 3.333648 | 2.221944 | 1.215098 |
| O    | 2.300807 | -0.54024 | -2.95567 |
| H    | 1.902585 | -0.86263 | -2.14092 |
| H    | 2.952437 | -1.17723 | -3.21421 |
| O    | 0.57953  | 3.927762 | 2.509445 |
| H    | 1.402363 | 3.615451 | 2.876356 |
| H    | -0.04149 | 3.227625 | 2.700931 |
| O    | 2.95875  | 2.300006 | 3.129332 |
| H    | 3.549174 | 2.313039 | 3.870795 |
| H    | 2.43232  | 1.483446 | 3.218808 |
| O    | -0.35927 | 0.505172 | 6.405112 |
| H    | 0.588121 | 0.393932 | 6.450276 |
| H    | -0.66892 | -0.26362 | 5.937187 |

### 3TS-4

| Atom | x        | y        | z        |
|------|----------|----------|----------|
| Si   | 1.540922 | 1.01307  | -0.19472 |
| Si   | -1.37597 | 0.623101 | -0.25467 |
| O    | -1.05114 | -0.88923 | -0.48668 |
| H    | -4.99079 | -0.85537 | -0.18194 |
| O    | -2.28963 | 1.255781 | -1.47591 |
| H    | -2.40651 | 2.200684 | -1.44312 |
| O    | -2.13331 | 0.960542 | 1.178193 |
| H    | -2.44209 | 0.178931 | 1.641688 |
| O    | -4.76036 | -1.7747  | -0.20411 |
| H    | -4.1905  | -1.86986 | -0.97071 |
| O    | 1.583643 | -0.59574 | -0.16251 |
| O    | 0.020396 | 1.551912 | -0.21657 |
| O    | 2.395711 | 1.592824 | 1.05998  |
| H    | 3.026967 | 0.965853 | 1.412212 |
| O    | 2.323253 | 1.538295 | -1.55738 |
| H    | 1.849219 | 1.428865 | -2.37113 |
| O    | 5.163144 | 1.014209 | -1.07693 |
| H    | 4.278243 | 1.172476 | -1.40101 |
| H    | 5.386364 | 1.79174  | -0.58288 |
| O    | 4.313943 | -0.64066 | 1.312097 |
| H    | 4.730729 | -0.36211 | 0.501423 |
| H    | 3.732986 | -1.36156 | 1.076091 |
| Si   | 0.823008 | -2.00916 | 0.107727 |
| O    | 2.266819 | -2.80767 | 0.591037 |
| H    | 2.195693 | -3.72342 | 0.818681 |
| O    | -0.03312 | -2.18992 | 1.515601 |
| H    | 0.505132 | -2.48039 | 2.238222 |
| O    | 0.396727 | -2.94494 | -1.17389 |
| H    | 1.100144 | -3.50143 | -1.47427 |
| O    | -2.03891 | 3.614252 | 2.124445 |
| H    | -2.17187 | 2.686904 | 1.913508 |
| H    | -1.18354 | 3.655187 | 2.530644 |
| O    | -1.63646 | 4.095927 | -0.74337 |
| H    | -1.89479 | 4.154953 | 0.174523 |
| H    | -0.79472 | 3.654579 | -0.72201 |
| O    | -2.86103 | -1.64418 | 2.093418 |
| H    | -3.47479 | -1.86161 | 1.395015 |
| H    | -2.00201 | -1.92541 | 1.783402 |
| O    | -2.90744 | -1.67222 | -2.4121  |
| H    | -2.13386 | -1.69182 | -1.83838 |
| H    | -2.9694  | -0.75138 | -2.63928 |

### 3R-4

| Atom | x        | y        | z        |
|------|----------|----------|----------|
| Si   | 0.198523 | -0.21068 | -0.36627 |
| Si   | -0.05391 | -0.24606 | 2.53777  |
| O    | 1.526127 | -0.29369 | 2.47283  |
| H    | 1.170509 | -0.38581 | 6.417942 |
| O    | -0.59831 | -1.60401 | 3.281583 |
| H    | -1.54328 | -1.72818 | 3.252922 |
| O    | -0.62211 | 1.081005 | 3.318828 |
| H    | 0.061655 | 1.597061 | 3.759758 |
| O    | 2.058387 | -0.22137 | 6.13045  |
| H    | 2.273244 | -0.95395 | 5.549166 |
| O    | 1.746644 | -0.3626  | 0.00803  |
| O    | -0.68425 | -0.22077 | 1.005672 |
| O    | -0.05002 | 1.127576 | -1.25599 |
| H    | 0.764054 | 1.482476 | -1.61502 |
| O    | -0.28859 | -1.47228 | -1.31915 |
| H    | -0.25589 | -2.33002 | -0.91742 |
| O    | 0.872228 | -0.68724 | -3.94426 |
| H    | 0.526313 | -1.14395 | -3.18154 |
| H    | 0.293979 | 0.056091 | -4.05511 |
| O    | 2.670075 | 1.326926 | -2.36593 |
| H    | 2.479093 | 0.589001 | -2.93561 |
| H    | 3.155043 | 0.965534 | -1.62096 |
| Si   | 2.776896 | -0.00165 | 1.282726 |
| O    | 4.030039 | 0.312621 | 0.05767  |
| H    | 4.873624 | 0.584547 | 0.390135 |
| O    | 2.873924 | 1.589266 | 1.850429 |
| H    | 3.400275 | 2.146098 | 1.297045 |
| O    | 3.670522 | -1.23824 | 1.990381 |
| H    | 4.423217 | -1.48531 | 1.475117 |
| O    | -3.37524 | 1.657054 | 3.024662 |
| H    | -2.44342 | 1.580428 | 3.240116 |
| H    | -3.41106 | 2.213248 | 2.258303 |
| O    | -3.35342 | -1.17364 | 2.28208  |
| H    | -3.58292 | -0.29989 | 2.593918 |
| H    | -2.87972 | -1.02323 | 1.471891 |
| O    | 1.69854  | 2.206488 | 4.437554 |
| H    | 1.952069 | 1.488392 | 5.01456  |
| H    | 2.180355 | 2.061701 | 3.622912 |
| O    | 2.332043 | -2.49147 | 4.325568 |
| H    | 2.808933 | -2.1004  | 3.593049 |
| H    | 1.425623 | -2.48057 | 4.036652 |

### 3TS-5

| Atom | x        | y        | z        |
|------|----------|----------|----------|
| Si   | 1.947829 | -0.16745 | -0.25191 |
| Si   | -0.59151 | 1.376031 | -0.38933 |
| O    | -1.24905 | -0.07195 | -0.71394 |
| H    | -5.71991 | 0.45427  | 0.251074 |
| O    | -0.68965 | 2.314112 | -1.71109 |
| H    | -0.23894 | 3.154524 | -1.65312 |
| O    | -1.34273 | 2.096167 | 0.867893 |
| H    | -1.91913 | 1.544267 | 1.410603 |
| O    | -5.21626 | -0.30769 | 0.50207  |
| H    | -4.799   | -0.62192 | -0.30281 |
| O    | 0.955772 | -1.38674 | -0.63463 |
| O    | 0.990335 | 1.13581  | -0.01279 |
| O    | 2.85938  | -0.52636 | 1.033908 |
| H    | 2.790477 | -1.44673 | 1.320092 |
| O    | 2.989598 | 0.161519 | -1.48063 |
| H    | 2.603807 | 0.415879 | -2.30772 |
| O    | 5.649091 | 0.227678 | 0.058489 |
| H    | 5.127059 | 0.271797 | -0.73412 |
| H    | 5.010049 | -0.01481 | 0.720016 |
| O    | 2.558248 | -3.28655 | 1.439113 |
| H    | 3.18095  | -3.71766 | 0.870274 |
| H    | 1.673559 | -3.5211  | 1.077636 |
| Si   | -0.63821 | -1.58135 | -0.32061 |
| O    | 0.144374 | -3.81435 | 0.415714 |
| H    | -0.273   | -4.60474 | 0.732714 |
| O    | -1.00286 | -1.65079 | 1.276029 |
| H    | -0.66244 | -2.49527 | 1.576655 |
| O    | -1.41007 | -2.57579 | -1.35471 |
| H    | -1.06219 | -3.44808 | -1.16631 |
| O    | -0.2359  | 4.552904 | 1.77032  |
| H    | -0.74186 | 3.76643  | 1.558128 |
| H    | 0.292485 | 4.321714 | 2.522212 |
| O    | 1.062956 | 4.456921 | -0.81661 |
| H    | 0.684537 | 4.684675 | 0.032155 |
| H    | 1.786507 | 3.874136 | -0.62227 |
| O    | -2.91787 | 0.271778 | 2.270343 |
| H    | -3.71639 | 0.082235 | 1.781062 |
| H    | -2.34122 | -0.47617 | 2.12192  |
| O    | -3.8061  | -0.95659 | -1.91285 |
| H    | -3.34804 | -1.79234 | -1.89862 |
| H    | -3.09504 | -0.33306 | -1.79683 |

**3R-5**

| Atom | x        | y        | z        |
|------|----------|----------|----------|
| Si   | 1.47536  | -0.90723 | -0.22901 |
| Si   | -0.6782  | 0.960314 | -1.05428 |
| O    | -1.6253  | -0.21668 | -0.47633 |
| O    | -1.05918 | 1.292843 | -2.59845 |
| H    | -0.47344 | 1.92628  | -3.00429 |
| O    | -0.81862 | 2.296136 | -0.11596 |
| H    | -1.47552 | 2.274187 | 0.582141 |
| O    | 0.29893  | -1.42512 | 0.75676  |
| O    | 0.867066 | 0.417747 | -0.98339 |
| O    | 2.842176 | -0.51019 | 0.554674 |
| H    | 2.787746 | 0.245397 | 1.138447 |
| O    | 1.913977 | -2.06054 | -1.29063 |
| H    | 1.190174 | -2.56935 | -1.65514 |
| O    | 4.90554  | -2.34117 | -0.72954 |
| H    | 4.110496 | -2.57033 | -1.19795 |
| H    | 4.602689 | -1.68127 | -0.11561 |
| O    | 2.35168  | 1.737922 | 2.294829 |
| H    | 2.951893 | 1.843616 | 3.020532 |
| H    | 1.496898 | 1.525422 | 2.688586 |
| Si   | -1.33925 | -1.21777 | 0.822769 |
| O    | -0.09841 | 1.115609 | 3.520211 |
| H    | -0.72622 | 1.824825 | 3.445418 |
| O    | -1.8525  | -0.63942 | 2.185383 |
| H    | -0.57189 | 0.357898 | 3.154699 |
| O    | -2.01462 | -2.6707  | 0.41451  |
| H    | -2.61334 | -3.01461 | 1.071258 |
| O    | 1.59549  | 3.843232 | 0.114601 |
| H    | 0.702747 | 3.504279 | 0.123302 |
| H    | 2.059378 | 3.289268 | 0.734703 |
| O    | 1.548796 | 2.819718 | -2.68512 |
| H    | 1.677293 | 3.340282 | -1.89407 |
| H    | 1.905895 | 1.967915 | -2.46255 |
| O    | -2.64906 | 1.935524 | 2.065442 |
| H    | -3.57599 | 2.066669 | 1.922883 |
| H    | -2.50482 | 0.973812 | 2.122717 |
| O    | -0.66893 | -3.15508 | -2.09692 |
| H    | -1.15912 | -3.25125 | -1.28103 |
| H    | -1.12637 | -2.47816 | -2.57961 |
| O    | -3.44447 | -2.69907 | 3.07706  |
| H    | -2.97726 | -3.14002 | 3.772805 |
| H    | -2.96561 | -1.87313 | 2.9229   |

**3R-6**

| Atom | x        | y        | z        |
|------|----------|----------|----------|
| Si   | 1.10327  | -0.25275 | -0.10816 |
| Si   | -2.99709 | 0.465674 | -0.37777 |
| O    | -1.89232 | 1.542679 | -0.61737 |
| H    | -0.33013 | 1.232379 | -0.97884 |
| O    | -2.71464 | -1.00888 | -1.09899 |
| H    | -1.82867 | -1.33685 | -0.96535 |
| O    | -4.50111 | 0.877336 | -0.97942 |
| H    | -4.49407 | 1.708351 | -1.43282 |
| O    | -3.22729 | 0.16619  | 1.241022 |
| H    | -4.01221 | -0.33043 | 1.452891 |
| O    | 2.624404 | -0.64004 | -0.5288  |
| O    | 0.623353 | 0.976094 | -1.03849 |
| O    | 0.106756 | -1.53198 | -0.34141 |
| H    | 0.330812 | -2.29028 | 0.191371 |
| O    | 1.228978 | 0.102495 | 1.487748 |
| H    | 0.467615 | 0.468804 | 1.958655 |
| O    | -5.97817 | -1.01028 | 0.732821 |
| H    | -5.78059 | -1.74897 | 0.162128 |
| H    | -5.89565 | -0.24716 | 0.169098 |
| O    | -1.1982  | 3.566138 | 1.080281 |
| H    | -0.35828 | 3.843667 | 0.742318 |
| H    | -1.52789 | 2.912294 | 0.442699 |
| O    | 1.78555  | -2.93365 | 1.709619 |
| H    | 1.710208 | -2.11984 | 2.196489 |
| H    | 2.664907 | -2.93819 | 1.349115 |
| O    | -0.97702 | 1.197369 | 2.764892 |
| H    | -1.76446 | 0.769734 | 2.428643 |
| H    | -1.02481 | 2.086581 | 2.415926 |
| O    | -4.92297 | -2.73922 | -1.44104 |
| H    | -4.10095 | -2.25082 | -1.35001 |
| H    | -5.31394 | -2.41672 | -2.24133 |
| Si   | 4.163728 | -0.35086 | -0.10176 |
| O    | 4.940188 | -1.77127 | 0.166002 |
| H    | 5.425178 | -2.11785 | -0.56945 |
| O    | 4.949353 | 0.392218 | -1.31184 |
| H    | 4.42967  | 1.031637 | -1.79901 |
| O    | 4.154298 | 0.491081 | 1.291755 |
| H    | 3.301214 | 0.58923  | 1.704052 |
| O    | 2.900539 | 2.166336 | -2.36102 |
| H    | 2.875268 | 3.055519 | -2.03542 |
| H    | 2.079226 | 1.762444 | -2.07391 |

### 3TS-7

| Atom | x        | y        | z        |
|------|----------|----------|----------|
| Si   | -0.8645  | -0.03135 | -0.28422 |
| Si   | 2.733771 | -0.2167  | -0.21736 |
| O    | 1.346939 | -0.93041 | -0.3983  |
| H    | 0.04295  | -1.1923  | -1.85138 |
| O    | 2.72741  | 1.386746 | -0.627   |
| H    | 1.831147 | 1.718771 | -0.59063 |
| O    | 3.958814 | -0.83668 | -1.17218 |
| H    | 3.841407 | -1.74814 | -1.40115 |
| O    | 3.265335 | -0.36001 | 1.347348 |
| H    | 4.163276 | -0.07858 | 1.496157 |
| O    | -2.44652 | 0.482618 | -0.34978 |
| O    | -0.84486 | -0.88626 | -1.69435 |
| O    | -0.06633 | 1.408057 | -0.26561 |
| H    | -0.64787 | 2.146303 | -0.08878 |
| O    | -0.92722 | -0.86289 | 1.125114 |
| H    | -0.1222  | -1.15924 | 1.548539 |
| O    | 6.083977 | 0.381442 | 0.529409 |
| H    | 5.991412 | 1.268108 | 0.188943 |
| H    | 5.736697 | -0.17746 | -0.15893 |
| O    | 1.05795  | -3.62013 | 0.190933 |
| H    | 0.121443 | -3.76452 | 0.172378 |
| H    | 1.176933 | -2.69867 | -0.07512 |
| O    | -1.90083 | 3.499535 | 0.771207 |
| H    | -1.65117 | 3.530099 | 1.685039 |
| H    | -2.74338 | 3.050004 | 0.746063 |
| O    | 1.267605 | -1.99054 | 2.706849 |
| H    | 1.993603 | -1.42325 | 2.454676 |
| H    | 1.349799 | -2.75569 | 2.146043 |
| O    | 5.155172 | 2.796225 | -0.91223 |
| H    | 4.268359 | 2.448204 | -0.79266 |
| H    | 5.340953 | 2.691242 | -1.83515 |
| Si   | -3.88907 | 0.365499 | 0.342004 |
| O    | -4.39182 | 1.87608  | 0.80296  |
| H    | -5.12763 | 2.206492 | 0.306293 |
| O    | -5.01455 | -0.14012 | -0.72119 |
| H    | -4.67882 | -0.66936 | -1.44413 |
| O    | -3.77626 | -0.57282 | 1.667166 |
| H    | -2.88585 | -0.87245 | 1.837542 |
| O    | -3.46127 | -1.66383 | -2.64916 |
| H    | -3.39949 | -2.59167 | -2.46847 |
| H    | -2.5928  | -1.30844 | -2.45081 |

### 3R-7

| Atom | x        | y        | z        |
|------|----------|----------|----------|
| Si   | 0.219457 | 0.741758 | 0.311059 |
| Si   | 2.440156 | -1.5218  | 0.323421 |
| O    | 1.513638 | -2.55069 | -0.56006 |
| H    | 0.675286 | -2.13747 | -0.76117 |
| O    | 2.892547 | -2.15871 | 1.757831 |
| H    | 2.516235 | -1.74421 | 2.533271 |
| O    | 1.066363 | 1.997601 | -0.4336  |
| H    | 0.535945 | 2.781101 | -0.46403 |
| O    | 3.860423 | -1.36089 | -0.52233 |
| H    | 4.631735 | -1.47077 | 0.016631 |
| O    | -1.26857 | 1.737254 | 0.132759 |
| O    | 1.682678 | -0.13667 | 0.499885 |
| O    | -0.06722 | 0.690488 | 1.978793 |
| H    | -0.71031 | 1.32686  | 2.279496 |
| O    | -0.43343 | -0.51692 | -0.60882 |
| H    | -1.35083 | -0.44183 | -0.83377 |
| O    | -2.55492 | 1.995827 | 3.209857 |
| H    | -2.9204  | 1.118818 | 3.204121 |
| H    | -2.95332 | 2.441817 | 2.46803  |
| Si   | -2.73147 | 1.806837 | -0.47111 |
| O    | -3.66663 | 2.736044 | 0.529849 |
| H    | -4.38992 | 3.192427 | 0.123794 |
| O    | -2.83047 | 2.464646 | -1.9587  |
| H    | -2.07923 | 2.310451 | -2.52904 |
| O    | -3.36411 | 0.283875 | -0.55458 |
| H    | -3.37354 | -0.18733 | 0.274223 |
| O    | -2.56595 | -0.87801 | 2.14953  |
| H    | -2.54005 | -1.8112  | 2.313337 |
| H    | -1.65449 | -0.58827 | 2.101116 |
| O    | -0.25401 | 1.690852 | -3.19958 |
| H    | 0.375589 | 1.78891  | -2.48906 |
| H    | -0.22808 | 0.769007 | -3.42186 |
| O    | 3.234436 | -3.38417 | -2.84308 |
| H    | 2.517666 | -3.37466 | -2.2155  |
| H    | 3.801764 | -2.69477 | -2.51987 |
| O    | 3.925708 | 1.66666  | -1.22448 |
| H    | 3.050381 | 1.864751 | -0.90054 |
| H    | 4.001149 | 0.724605 | -1.1244  |
| O    | 1.724978 | -0.49309 | 3.806518 |
| H    | 2.389319 | 0.160597 | 3.977104 |
| H    | 1.104473 | -0.07173 | 3.204771 |

3TS-8

| Atom | x        | y        | z        |
|------|----------|----------|----------|
| Si   | -0.07787 | 0.100146 | -0.21431 |
| Si   | -2.74148 | -1.18486 | -0.62843 |
| O    | -3.21092 | -0.25632 | 0.648224 |
| H    | -2.523   | 0.024218 | 1.243765 |
| O    | -3.00988 | -2.7685  | -0.40012 |
| H    | -2.53581 | -3.1893  | 0.320138 |
| O    | -0.59323 | 1.596944 | -0.77743 |
| H    | 0.099528 | 2.154671 | -1.10634 |
| O    | -3.7093  | -0.75493 | -1.8762  |
| H    | -4.12724 | -1.47541 | -2.32575 |
| O    | 1.460205 | 0.087457 | -0.75358 |
| O    | -1.18187 | -0.8688  | -0.92301 |
| O    | 0.596825 | -1.98926 | 0.737262 |
| H    | 0.668133 | -2.4782  | -0.07309 |
| O    | -0.32645 | 0.339108 | 1.406297 |
| H    | -0.04088 | -0.43504 | 1.878604 |
| O    | 4.654515 | -2.35891 | -1.17202 |
| H    | 4.217221 | -2.41071 | -0.32658 |
| H    | 4.358491 | -1.54125 | -1.55592 |
| Si   | 2.769935 | 0.997877 | -0.46407 |
| O    | 3.790948 | 0.66067  | -1.70469 |
| H    | 4.625694 | 1.107524 | -1.69147 |
| O    | 2.400087 | 2.585401 | -0.49179 |
| H    | 2.007754 | 2.954334 | 0.301204 |
| O    | 3.43782  | 0.672656 | 0.977857 |
| H    | 3.453112 | -0.24084 | 1.265278 |
| O    | 3.13178  | -2.08567 | 1.426118 |
| H    | 3.227073 | -2.57025 | 2.233794 |
| H    | 2.167641 | -2.07512 | 1.203691 |
| O    | 0.653562 | 3.213058 | 1.803262 |
| H    | -0.15456 | 3.656723 | 1.558888 |
| H    | 0.383626 | 2.311937 | 1.957691 |
| O    | -4.68101 | 2.193805 | 0.014911 |
| H    | -4.33059 | 1.353987 | 0.306392 |
| H    | -4.6702  | 2.137883 | -0.93181 |
| O    | -2.06281 | 3.633982 | 0.579736 |
| H    | -1.68534 | 2.913513 | 0.07653  |
| H    | -2.99875 | 3.458775 | 0.586732 |
| O    | -1.33545 | -3.53445 | 1.755184 |
| H    | -0.98019 | -4.39645 | 1.918887 |
| H    | -0.58858 | -2.97526 | 1.454576 |

3TS-8

| Atom | x        | y        | z        |
|------|----------|----------|----------|
| Si   | -0.2446  | 0.588695 | -0.49296 |
| Si   | -2.81928 | -0.65706 | -1.21639 |
| O    | -3.13532 | -0.47665 | 0.386288 |
| H    | -2.33702 | -0.47992 | 0.918677 |
| O    | -2.75425 | -2.21013 | -1.6843  |
| H    | -2.07907 | -2.72805 | -1.23968 |
| O    | -0.40886 | 2.23114  | -0.27349 |
| H    | -0.5039  | 2.734151 | -1.07053 |
| O    | -4.07294 | 0.014128 | -2.03179 |
| H    | -4.54029 | -0.57991 | -2.60167 |
| O    | 1.163121 | 0.397833 | -1.31738 |
| O    | -1.44374 | 0.14698  | -1.53121 |
| O    | -0.32385 | -0.20444 | 0.855945 |
| O    | 3.816128 | -2.50101 | 1.330252 |
| H    | 3.202873 | -2.00055 | 1.864543 |
| H    | 4.244221 | -1.84202 | 0.796471 |
| Si   | 2.735748 | 0.23956  | -1.5234  |
| O    | 3.018964 | -1.18756 | -2.29163 |
| H    | 3.659666 | -1.16408 | -2.98815 |
| O    | 3.387867 | 1.372029 | -2.51748 |
| H    | 3.712657 | 2.15583  | -2.09764 |
| O    | 3.535556 | 0.318993 | -0.1068  |
| H    | 3.043188 | 0.257733 | 0.714946 |
| O    | 2.040951 | -0.34532 | 2.194398 |
| H    | 1.836762 | 0.223632 | 2.930275 |
| H    | 1.192318 | -0.42453 | 1.730188 |
| O    | -0.26875 | 1.195853 | 3.39973  |
| H    | -0.75337 | 2.0101   | 3.302096 |
| H    | -0.43831 | 0.721636 | 2.585627 |
| O    | -4.43964 | 2.014498 | 1.08585  |
| H    | -4.10474 | 1.12631  | 0.964523 |
| H    | -4.73056 | 2.282591 | 0.224313 |
| O    | -1.90107 | 3.353795 | 2.028975 |
| H    | -1.37441 | 3.078524 | 1.283007 |
| H    | -2.77567 | 3.015082 | 1.855004 |
| O    | -0.62187 | -3.0249  | 0.030274 |
| H    | 0.227527 | -3.33823 | -0.277   |
| H    | -0.45159 | -2.18845 | 0.464149 |
| O    | 2.117613 | -3.65101 | -0.81448 |
| H    | 2.667799 | -3.46991 | -0.05505 |
| H    | 2.337933 | -2.97351 | -1.44593 |



**4R-1**

| Atom | x        | y        | z        |
|------|----------|----------|----------|
| 14   | 0.491844 | 1.041583 | -0.10614 |
| 14   | 4.19733  | -0.87166 | 0.348466 |
| 8    | 3.018564 | -0.89576 | 1.47417  |
| 1    | 2.102275 | -0.86449 | 1.155683 |
| 8    | 4.209711 | 0.539769 | -0.49289 |
| 1    | 3.391604 | 0.895936 | -0.83185 |
| 8    | 4.082058 | -2.11673 | -0.70945 |
| 1    | 3.253075 | -2.23074 | -1.17221 |
| 8    | 5.612197 | -0.9902  | 1.139436 |
| 1    | 6.380083 | -0.9707  | 0.579538 |
| 8    | -1.01289 | 1.507447 | -0.53513 |
| 8    | 0.536486 | -0.43271 | 0.463539 |
| 8    | 1.455668 | 1.224009 | -1.4581  |
| 1    | 1.33454  | 0.557926 | -2.12527 |
| 8    | 1.082821 | 2.208838 | 0.890196 |
| 1    | 1.443222 | 1.939633 | 1.730946 |
| 8    | 0.891872 | 4.304847 | -1.1273  |
| 1    | 1.009238 | 3.959399 | -0.24559 |
| 1    | 1.177904 | 3.587781 | -1.6827  |
| 8    | 6.678612 | -0.78563 | -1.69961 |
| 1    | 6.12854  | -0.00953 | -1.71674 |
| 1    | 6.079044 | -1.50804 | -1.8528  |
| 8    | -0.7738  | 0.070574 | 2.933641 |
| 1    | -0.29389 | -0.31256 | 2.196656 |
| 1    | -0.10842 | 0.49387  | 3.463877 |
| 8    | 2.198136 | 1.067902 | 3.344334 |
| 1    | 2.635713 | 0.352585 | 2.877495 |
| 1    | 2.873797 | 1.538238 | 3.813265 |
| 8    | 1.393886 | -1.91262 | -1.75584 |
| 1    | 0.738359 | -2.54333 | -2.0267  |
| 1    | 1.037789 | -1.51295 | -0.95552 |
| 14   | -2.58099 | 1.295025 | -0.20682 |
| 8    | -3.47108 | 2.424018 | -0.9436  |
| 1    | -3.04702 | 3.267776 | -1.10112 |
| 8    | -3.06575 | -0.15782 | -0.74639 |
| 8    | -2.84686 | 1.350643 | 1.412877 |
| 1    | -2.16892 | 1.021744 | 2.006907 |
| 8    | -1.9449  | 4.816292 | -1.48826 |
| 1    | -1.99863 | 5.13344  | -2.37902 |
| 1    | -1.01638 | 4.636393 | -1.3276  |
| 14   | -2.99581 | -1.76538 | -0.61867 |
| 8    | -1.46763 | -2.27218 | -0.32857 |
| 1    | -0.84291 | -1.67022 | 0.085463 |
| 8    | -3.48264 | -2.42763 | -2.027   |
| 1    | -3.55592 | -3.37479 | -2.00157 |
| 8    | -3.96958 | -2.28491 | 0.589375 |
| 1    | -4.46648 | -1.64098 | 1.093077 |
| 8    | -5.28257 | -0.09396 | 1.943138 |
| 1    | -4.51859 | 0.483201 | 1.94443  |
| 1    | -5.91801 | 0.324042 | 1.377431 |
| 8    | -3.02923 | -4.9323  | -0.25274 |
| 1    | -3.57632 | -4.44406 | 0.354728 |
| 1    | -2.15162 | -4.59875 | -0.10306 |

**4TS-2**

| Atom | x        | y        | z        |
|------|----------|----------|----------|
| 14   | 0.612546 | 0.891041 | -0.50254 |
| 14   | 3.489232 | -0.96689 | 0.20984  |
| 8    | 3.853061 | 0.450663 | -0.55568 |
| 1    | 3.186948 | 0.833101 | -1.10951 |
| 8    | 3.251231 | -2.3061  | -0.71068 |
| 1    | 2.369803 | -2.45894 | -1.02433 |
| 8    | 2.793968 | -0.97534 | 1.720534 |
| 1    | 1.849016 | -0.98965 | 1.644894 |
| 8    | 5.071682 | -1.22915 | 0.728407 |
| 1    | 5.122647 | -1.85704 | 1.435306 |
| 8    | -0.94941 | 0.728697 | -0.94631 |
| 8    | 1.378247 | -0.47293 | -0.33514 |
| 8    | 1.336499 | 1.838967 | -1.6797  |
| 1    | 1.217852 | 1.530429 | -2.5685  |
| 8    | 0.555208 | 1.859998 | 0.830325 |
| 1    | 1.309223 | 1.888992 | 1.427249 |
| 8    | 0.449932 | 4.481859 | -0.77758 |
| 1    | 0.437938 | 4.1409   | 0.109946 |
| 1    | 0.87075  | 3.782362 | -1.27224 |
| 8    | 6.121586 | -3.14966 | -1.32721 |
| 1    | 6.165719 | -2.39906 | -0.74395 |
| 1    | 5.183855 | -3.27127 | -1.42674 |
| 8    | 2.772357 | 1.810085 | 2.604104 |
| 1    | 2.887661 | 0.862677 | 2.600328 |
| 1    | 3.600634 | 2.147906 | 2.26802  |
| 8    | 5.392264 | 2.032837 | 1.255046 |
| 1    | 4.986328 | 1.627682 | 0.489037 |
| 1    | 5.924547 | 1.336702 | 1.618729 |
| 8    | 0.039869 | -2.80165 | -1.00323 |
| 1    | -0.32541 | -3.13927 | -0.19285 |
| 1    | 0.385363 | -1.92986 | -0.78402 |
| 14   | -2.4699  | 0.971114 | -0.43733 |
| 8    | -3.28339 | 2.003671 | -1.37511 |
| 1    | -2.99706 | 2.915045 | -1.42652 |
| 8    | -3.29314 | -0.41361 | -0.44749 |
| 8    | -2.37268 | 1.524859 | 1.114357 |
| 1    | -1.4909  | 1.757917 | 1.394875 |
| 8    | -2.26962 | 4.682517 | -1.60004 |
| 1    | -2.29446 | 5.051487 | -2.47197 |
| 1    | -1.3497  | 4.690272 | -1.32615 |
| 14   | -3.30588 | -2.02614 | -0.5574  |
| 8    | -2.50275 | -2.6836  | 0.705487 |
| 1    | -2.949   | -2.58738 | 1.545987 |
| 8    | -2.64684 | -2.59306 | -1.92431 |
| 1    | -1.69585 | -2.70856 | -1.9065  |
| 8    | -4.89417 | -2.44813 | -0.53526 |
| 1    | -5.11392 | -3.23959 | -1.00622 |
| 8    | -4.3683  | 0.796709 | 3.033064 |
| 1    | -3.65886 | 1.05804  | 2.44461  |
| 1    | -5.08251 | 1.39412  | 2.858632 |
| 8    | -4.59933 | -2.0559  | 2.573253 |
| 1    | -5.22197 | -2.12902 | 1.859397 |
| 1    | -4.57276 | -1.12968 | 2.811862 |

**4R-2**

| Atom | x        | y        | z        |
|------|----------|----------|----------|
| 14   | 0.676735 | 0.876439 | -0.55954 |
| 14   | 3.211591 | -0.98266 | 0.145854 |
| 8    | 3.775815 | 0.426914 | -0.55869 |
| 1    | 3.234533 | 0.822901 | -1.22462 |
| 8    | 3.141752 | -2.37054 | -0.76179 |
| 1    | 2.313038 | -2.56394 | -1.17583 |
| 8    | 2.529719 | -1.05431 | 1.690067 |
| 1    | 1.585531 | -1.09774 | 1.664538 |
| 8    | 4.779791 | -1.26775 | 0.791496 |
| 1    | 4.760063 | -1.95713 | 1.440316 |
| 8    | -0.89765 | 0.685365 | -0.92115 |
| 8    | 1.436004 | -0.51372 | -0.46518 |
| 8    | 1.329153 | 1.833934 | -1.75963 |
| 1    | 1.140002 | 1.559791 | -2.64749 |
| 8    | 0.698718 | 1.799649 | 0.794169 |
| 1    | 1.458289 | 1.79953  | 1.388227 |
| 8    | 0.7071   | 4.526262 | -0.79128 |
| 1    | 0.762932 | 4.259647 | 0.118948 |
| 1    | 1.036456 | 3.768221 | -1.2693  |
| 8    | 6.061045 | -3.01218 | -1.23832 |
| 1    | 6.023643 | -2.28846 | -0.61992 |
| 1    | 5.137538 | -3.18351 | -1.38649 |
| 8    | 2.82082  | 1.648343 | 2.635691 |
| 1    | 2.815906 | 0.69285  | 2.634887 |
| 1    | 3.704752 | 1.873487 | 2.34764  |
| 8    | 5.498837 | 1.558213 | 1.407347 |
| 1    | 5.084589 | 1.508036 | 0.549359 |
| 1    | 5.650777 | 0.634551 | 1.585002 |
| 8    | -0.0864  | -2.79163 | -1.21192 |
| 1    | -0.44512 | -3.13317 | -0.39985 |
| 1    | 0.313145 | -1.95191 | -0.97961 |
| 14   | -2.39607 | 1.024608 | -0.39052 |
| 8    | -3.14287 | 2.124228 | -1.30528 |
| 1    | -2.82663 | 3.027235 | -1.3149  |
| 8    | -3.30098 | -0.30679 | -0.41715 |
| 8    | -2.24415 | 1.540162 | 1.168719 |
| 1    | -1.35286 | 1.757258 | 1.430751 |
| 8    | -2.05984 | 4.77653  | -1.41406 |
| 1    | -2.15108 | 5.238934 | -2.2356  |
| 1    | -1.12293 | 4.767703 | -1.2064  |
| 14   | -3.3713  | -1.91359 | -0.59291 |
| 8    | -2.52113 | -2.64586 | 0.59579  |
| 1    | -2.9248  | -2.58386 | 1.461136 |
| 8    | -2.8011  | -2.43672 | -2.01628 |
| 1    | -1.85678 | -2.59168 | -2.05094 |
| 8    | -4.96771 | -2.28873 | -0.50362 |
| 1    | -5.24067 | -3.04545 | -1.00304 |
| 8    | -4.13467 | 0.755326 | 3.176228 |
| 1    | -3.46784 | 1.0338   | 2.547602 |
| 1    | -4.82946 | 1.396852 | 3.12147  |
| 8    | -4.48692 | -2.05955 | 2.600852 |
| 1    | -5.16057 | -2.08012 | 1.931357 |
| 1    | -4.41857 | -1.14821 | 2.884164 |

**4TS-3**

| Atom | x         | y         | z         |
|------|-----------|-----------|-----------|
| 14   | 0.598603  | 1.199301  | -0.600898 |
| 14   | 2.768362  | -1.038724 | -0.344227 |
| 8    | 3.885136  | 0.000586  | -0.983952 |
| 1    | 3.526459  | 0.607586  | -1.61743  |
| 8    | 2.467084  | -2.369018 | -1.249001 |
| 1    | 3.266467  | -2.892289 | -1.21509  |
| 8    | 2.862087  | -1.171103 | 1.28204   |
| 1    | 3.653972  | -1.69182  | 1.43607   |
| 8    | 4.763305  | -2.430846 | 0.081955  |
| 1    | 4.801262  | -3.330807 | 0.381058  |
| 8    | -0.977315 | 1.02048   | -0.907802 |
| 8    | 1.344904  | -0.206157 | -0.543227 |
| 8    | 1.226066  | 2.128291  | -1.822036 |
| 1    | 0.921607  | 1.909993  | -2.693105 |
| 8    | 0.728045  | 2.068087  | 0.773197  |
| 1    | 1.492263  | 1.929099  | 1.350671  |
| 8    | 0.407068  | 4.730671  | -0.562918 |
| 1    | 0.526641  | 4.244719  | 0.247147  |
| 1    | 0.810836  | 4.165816  | -1.214934 |
| 8    | 6.954537  | -1.121543 | 0.916688  |
| 1    | 6.170178  | -1.629831 | 0.619445  |
| 1    | 7.508917  | -1.055293 | 0.152008  |
| 8    | 2.902134  | 1.473247  | 2.369102  |
| 1    | 2.857579  | 0.521871  | 2.285365  |
| 1    | 3.789534  | 1.68342   | 2.077464  |
| 8    | 5.494803  | 1.398656  | 1.018812  |
| 1    | 5.043086  | 1.028897  | 0.264346  |
| 1    | 6.105778  | 0.702419  | 1.256946  |
| 8    | -0.171807 | -3.604027 | -1.326766 |
| 1    | -0.445989 | -3.547117 | -0.417624 |
| 1    | 0.6893    | -3.190135 | -1.374417 |
| 14   | -2.458554 | 1.06044   | -0.239043 |
| 8    | -3.407609 | 2.151037  | -0.958025 |
| 1    | -3.141848 | 3.069862  | -0.946723 |
| 8    | -3.185212 | -0.362862 | -0.370906 |
| 8    | -2.247744 | 1.415489  | 1.358407  |
| 1    | -1.370444 | 1.686805  | 1.610006  |
| 8    | -2.420487 | 4.85387   | -0.959957 |
| 1    | -2.614718 | 5.432451  | -1.684054 |
| 1    | -1.470484 | 4.884194  | -0.828982 |
| 14   | -3.216999 | -1.965242 | -0.587351 |
| 8    | -2.359965 | -2.717722 | 0.580646  |
| 1    | -2.755996 | -2.683581 | 1.450215  |
| 8    | -2.635709 | -2.434747 | -2.020669 |
| 1    | -1.756154 | -2.82024  | -2.022868 |
| 8    | -4.812636 | -2.359899 | -0.499149 |
| 1    | -5.070781 | -3.115252 | -1.008564 |
| 8    | -4.221278 | 0.561804  | 3.264875  |
| 1    | -3.506199 | 0.862229  | 2.703932  |
| 1    | -4.946215 | 1.147589  | 3.094895  |
| 8    | -4.391269 | -2.257823 | 2.575418  |
| 1    | -5.018522 | -2.274856 | 1.861746  |
| 1    | -4.379394 | -1.358317 | 2.899875  |

### 4R-3

| Atom | x        | y        | z        |
|------|----------|----------|----------|
| 14   | -0.84569 | 1.105501 | -0.73074 |
| 14   | -2.98061 | -1.11419 | -0.56741 |
| 8    | -3.73598 | -1.46029 | -1.99193 |
| 1    | -3.34685 | -2.14467 | -2.51739 |
| 8    | -2.62338 | 0.362224 | 2.683354 |
| 1    | -3.15466 | 0.84275  | 3.303172 |
| 8    | -2.4704  | -2.58583 | -0.00695 |
| 1    | -2.04331 | -2.56838 | 0.85082  |
| 8    | -3.84613 | -0.23335 | 0.395958 |
| 1    | -3.1959  | 0.141701 | 1.923235 |
| 8    | 0.665153 | 1.029378 | -1.30741 |
| 8    | -1.55748 | -0.32585 | -0.96304 |
| 8    | -0.71889 | 1.476881 | 0.860513 |
| 1    | -1.3313  | 1.125724 | 1.506106 |
| 8    | -1.58668 | 2.314391 | -1.52701 |
| 1    | -2.5351  | 2.38858  | -1.40227 |
| 8    | -0.19893 | 4.297941 | 0.891423 |
| 1    | -0.55904 | 4.486562 | 0.03342  |
| 1    | -0.46842 | 3.396883 | 1.065637 |
| 8    | -6.25612 | -0.90151 | 1.70285  |
| 1    | -6.14062 | -1.83259 | 1.831304 |
| 1    | -5.48678 | -0.62702 | 1.194206 |
| 8    | -0.39349 | -2.88589 | -1.99944 |
| 1    | -0.5028  | -1.93907 | -1.99371 |
| 1    | -0.9938  | -3.1671  | -1.31098 |
| 8    | -4.36805 | 2.159129 | -0.87482 |
| 1    | -4.95856 | 1.931985 | -1.58035 |
| 1    | -4.29539 | 1.357377 | -0.33719 |
| 8    | -1.05776 | -2.09359 | 2.472751 |
| 1    | -0.16612 | -1.82525 | 2.26752  |
| 1    | -1.51398 | -1.31132 | 2.773171 |
| 14   | 2.267685 | 0.961834 | -1.39359 |
| 8    | 2.933631 | 2.394287 | -1.73464 |
| 1    | 2.949559 | 3.005061 | -0.99542 |
| 8    | 2.883924 | 0.326619 | -0.04606 |
| 8    | 2.682363 | -0.10157 | -2.58467 |
| 1    | 2.603544 | 0.196808 | -3.48011 |
| 8    | 2.60578  | 3.580189 | 0.847293 |
| 1    | 2.630429 | 2.849911 | 1.457767 |
| 1    | 1.721877 | 3.942679 | 0.904341 |
| 14   | 2.888004 | -0.36884 | 1.407475 |
| 8    | 2.604213 | 0.801833 | 2.513218 |
| 1    | 2.974336 | 0.672174 | 3.375016 |
| 8    | 4.334174 | -1.01057 | 1.769496 |
| 1    | 4.579083 | -1.83309 | 1.347872 |
| 8    | 1.703188 | -1.49901 | 1.444663 |
| 1    | 1.679143 | -2.05217 | 0.667244 |
| 8    | 2.327066 | -2.74699 | -1.24893 |
| 1    | 1.453882 | -3.01812 | -1.54085 |
| 1    | 2.540858 | -1.98401 | -1.78168 |
| 8    | 4.769048 | -3.35462 | 0.117245 |
| 1    | 3.941352 | -3.36384 | -0.36336 |
| 1    | 5.445187 | -3.20231 | -0.52883 |

### 4TS-4

| Atom | x        | y        | z        |
|------|----------|----------|----------|
| 14   | -1.45455 | 1.339429 | -1.25624 |
| 14   | -1.87652 | 0.013129 | 1.281182 |
| 8    | -0.98889 | 0.272426 | 2.663943 |
| 1    | -0.36624 | -0.42828 | 2.834265 |
| 8    | 1.101139 | 4.746361 | 1.113594 |
| 1    | 1.190025 | 3.996189 | 1.699392 |
| 8    | -3.46209 | 0.043051 | 1.77839  |
| 1    | -3.59828 | -0.082   | 2.706354 |
| 8    | -1.44062 | -1.22384 | 0.448855 |
| 1    | 1.500665 | 4.479059 | 0.287256 |
| 8    | -0.24569 | 0.341958 | -1.67011 |
| 8    | -1.72246 | 1.37936  | 0.339064 |
| 8    | -1.04216 | 2.835456 | -1.74934 |
| 1    | -1.24837 | 3.546086 | -1.13542 |
| 8    | -2.77817 | 0.805963 | -2.07421 |
| 1    | -3.47734 | 1.432799 | -2.19925 |
| 8    | 1.942964 | 3.586185 | -1.46682 |
| 1    | 1.097898 | 3.222057 | -1.71283 |
| 1    | 2.539513 | 2.854276 | -1.32727 |
| 8    | 1.156365 | 2.277943 | 2.700692 |
| 1    | 1.71921  | 1.621711 | 2.304656 |
| 1    | 0.309441 | 1.842067 | 2.770227 |
| 8    | -4.64757 | -1.36688 | -0.69885 |
| 1    | -4.01069 | -0.91667 | -1.24421 |
| 1    | -4.45043 | -1.06683 | 0.183457 |
| 8    | -1.64589 | 4.522535 | 0.417141 |
| 1    | -1.8907  | 3.758733 | 0.927393 |
| 1    | -0.76178 | 4.753836 | 0.713346 |
| 8    | -0.99565 | -3.55321 | 1.70398  |
| 1    | -1.26227 | -2.75466 | 1.21642  |
| 1    | -1.36968 | -4.27298 | 1.211636 |
| 14   | 0.50006  | -1.07344 | -1.49924 |
| 8    | 1.626841 | -1.02114 | -2.74802 |
| 1    | 1.60173  | -0.20719 | -3.23375 |
| 8    | 1.406267 | -1.17998 | -0.17781 |
| 8    | -0.33041 | -2.43558 | -1.83323 |
| 1    | -0.14643 | -2.8072  | -2.68457 |
| 8    | 3.806774 | 1.396739 | -0.72089 |
| 1    | 3.474281 | 1.078612 | 0.112922 |
| 1    | 4.144435 | 0.622071 | -1.15773 |
| 14   | 2.149035 | -1.51527 | 1.201846 |
| 8    | 2.794136 | -0.06603 | 1.697044 |
| 1    | 3.380714 | -0.12142 | 2.440869 |
| 8    | 3.35791  | -2.57375 | 0.930346 |
| 1    | 3.833106 | -2.43016 | 0.11661  |
| 8    | 1.196541 | -2.02552 | 2.399411 |
| 1    | 0.56724  | -2.73478 | 2.231113 |
| 8    | -2.80488 | -3.84925 | -0.94224 |
| 1    | -3.52549 | -3.25173 | -0.76481 |
| 1    | -2.05472 | -3.27349 | -1.0606  |
| 8    | 4.236145 | -1.45618 | -1.72497 |
| 1    | 4.818663 | -1.81912 | -2.37825 |
| 1    | 3.368253 | -1.38779 | -2.13079 |

#### 4R-4

| Atom | x        | y        | z        |
|------|----------|----------|----------|
| 14   | -1.94192 | 1.130286 | 0.800658 |
| 14   | -1.79215 | -1.79912 | 0.719362 |
| 8    | -1.3168  | -2.40285 | 2.18285  |
| 1    | -1.85748 | -3.0959  | 2.535372 |
| 8    | -2.83638 | -2.89699 | 0.132955 |
| 1    | -3.04209 | -2.82573 | -0.80225 |
| 8    | -0.50647 | -1.50506 | -0.17135 |
| 8    | -0.5243  | 0.98858  | 0.044393 |
| 8    | -2.56432 | -0.3653  | 0.961989 |
| 8    | -1.87245 | 1.960197 | 2.180598 |
| 1    | -1.1358  | 1.85201  | 2.791364 |
| 8    | -2.98605 | 2.009331 | -0.14654 |
| 1    | -3.3812  | 2.74163  | 0.309413 |
| 8    | 1.660481 | 2.692844 | 1.161367 |
| 1    | 1.066694 | 2.122415 | 0.676837 |
| 1    | 2.53928  | 2.345208 | 1.000332 |
| 8    | 1.132592 | -1.16536 | 3.335175 |
| 1    | 1.775475 | -1.28196 | 2.641417 |
| 1    | 0.350165 | -1.6308  | 3.050123 |
| 8    | -4.91979 | -0.01484 | -1.1939  |
| 1    | -4.37159 | 0.752385 | -1.05628 |
| 1    | -4.80355 | -0.52146 | -0.39878 |
| 8    | 0.468319 | 1.649912 | 3.646238 |
| 1    | 0.72626  | 0.727943 | 3.650203 |
| 1    | 1.025757 | 2.07822  | 3.000494 |
| 14   | 0.164495 | -0.10722 | -1.05707 |
| 8    | 0.917839 | 1.197621 | -1.94301 |
| 1    | 0.373924 | 1.96883  | -2.07014 |
| 8    | 1.697885 | -0.68856 | -0.7659  |
| 8    | -0.76844 | -0.55807 | -2.38545 |
| 1    | -0.55309 | -0.01895 | -3.13352 |
| 8    | 4.1456   | 1.341872 | 0.630698 |
| 1    | 3.939345 | 0.478241 | 0.974262 |
| 1    | 4.120665 | 1.246431 | -0.31964 |
| 14   | 2.610761 | -1.93115 | -0.36972 |
| 8    | 3.171241 | -1.59288 | 1.165266 |
| 1    | 3.807863 | -2.2031  | 1.513664 |
| 8    | 3.900661 | -2.03276 | -1.36373 |
| 1    | 4.062719 | -1.23035 | -1.85293 |
| 8    | 1.825438 | -3.35498 | -0.36653 |
| 1    | 0.88166  | -3.23832 | -0.30237 |
| 8    | -3.2137  | -2.06626 | -2.53823 |
| 1    | -3.84067 | -1.36566 | -2.37838 |
| 1    | -2.3594  | -1.63827 | -2.60412 |
| 8    | 3.677196 | 0.877869 | -2.23404 |
| 1    | 3.929974 | 1.457335 | -2.93912 |
| 1    | 2.71596  | 0.958995 | -2.14657 |
| 8    | 0.765631 | 5.036423 | -0.23451 |
| 1    | 1.512994 | 5.349545 | -0.72514 |
| 1    | 1.099199 | 4.335285 | 0.328794 |
| 8    | -0.9771  | 3.552376 | -2.09491 |
| 1    | -0.51026 | 4.109494 | -1.47488 |
| 1    | -1.66621 | 3.122221 | -1.60083 |

#### 4TS-5

| Atom | x        | y        | z        |
|------|----------|----------|----------|
| 14   | -1.77226 | 1.423059 | -1.34015 |
| 14   | -2.11032 | 0.263663 | 1.353638 |
| 8    | -1.4734  | 1.342999 | 2.431192 |
| 1    | -1.76051 | 1.242312 | 3.328986 |
| 8    | 1.725567 | 4.14142  | 1.013889 |
| 1    | 1.841668 | 3.45262  | 1.664426 |
| 8    | -3.35695 | -0.48444 | 2.06046  |
| 1    | -3.32468 | -1.44544 | 2.088925 |
| 8    | -0.99268 | -0.78286 | 0.850611 |
| 1    | 1.963139 | 3.743747 | 0.175256 |
| 8    | -0.37155 | 0.603865 | -1.21329 |
| 8    | -2.57178 | 1.133908 | 0.054985 |
| 8    | -1.5681  | 2.988229 | -1.64098 |
| 1    | -1.37956 | 3.564099 | -0.89297 |
| 8    | -2.69134 | 0.815899 | -2.56018 |
| 1    | -2.77022 | 1.360322 | -3.33168 |
| 8    | 2.254334 | 2.657428 | -1.41405 |
| 1    | 1.582885 | 1.995445 | -1.53713 |
| 1    | 3.084476 | 2.184482 | -1.36479 |
| 8    | 1.606675 | 1.792019 | 2.784174 |
| 1    | 2.16345  | 1.124476 | 2.394328 |
| 1    | 0.707687 | 1.531909 | 2.611938 |
| 8    | -4.67133 | -1.05758 | -1.3931  |
| 1    | -4.12158 | -0.47225 | -1.90769 |
| 1    | -4.75469 | -0.63909 | -0.54487 |
| 8    | -1.08047 | 4.217713 | 0.821355 |
| 1    | -1.33108 | 3.551221 | 1.451006 |
| 1    | -0.12873 | 4.322791 | 0.913953 |
| 8    | -2.79191 | -3.24003 | 1.943727 |
| 1    | -1.85197 | -3.10778 | 1.973874 |
| 1    | -2.97416 | -3.45197 | 1.023908 |
| 14   | 0.013623 | -0.81458 | -0.48222 |
| 8    | 1.356207 | -1.14705 | -2.65743 |
| 1    | 1.06101  | -0.5358  | -3.31829 |
| 8    | 1.48993  | -0.78993 | 0.180649 |
| 8    | -0.43697 | -2.18876 | -1.22166 |
| 1    | 0.115937 | -2.21306 | -2.02078 |
| 8    | 4.639229 | 1.053727 | -1.01705 |
| 1    | 4.462072 | 0.758617 | -0.13152 |
| 1    | 4.48499  | 0.296499 | -1.58296 |
| 14   | 2.657921 | -1.55934 | 0.964951 |
| 8    | 3.484392 | -0.31998 | 1.681575 |
| 1    | 4.123858 | -0.56448 | 2.337037 |
| 8    | 3.589211 | -2.48237 | 0.024434 |
| 1    | 3.756354 | -2.19813 | -0.88169 |
| 8    | 2.125752 | -2.53139 | 2.169915 |
| 1    | 2.108579 | -3.45713 | 1.970508 |
| 8    | -3.04112 | -3.47236 | -0.86744 |
| 1    | -3.65109 | -2.78935 | -1.13764 |
| 1    | -2.17171 | -3.1451  | -1.0931  |
| 8    | 3.858459 | -1.31525 | -2.44807 |
| 1    | 4.208654 | -1.74924 | -3.21314 |
| 1    | 2.852446 | -1.22071 | -2.59277 |

#### 4R-5

| Atom | x        | y        | z        |
|------|----------|----------|----------|
| 14   | 1.821771 | 0.536505 | 1.728451 |
| 14   | 2.466819 | 0.58445  | -1.19115 |
| 8    | 2.838608 | 2.105335 | -1.67372 |
| 1    | 3.147236 | 2.208898 | -2.56318 |
| 8    | -0.88864 | 4.253722 | -0.14802 |
| 1    | -1.02347 | 3.771478 | -0.96121 |
| 8    | 3.346711 | -0.4596  | -2.05247 |
| 1    | 2.923218 | -1.28963 | -2.30138 |
| 8    | 0.871147 | 0.306181 | -1.33386 |
| 1    | -1.32439 | 3.756019 | 0.542803 |
| 8    | 0.338712 | 0.130094 | 1.20289  |
| 8    | 2.785038 | 0.501459 | 0.407709 |
| 8    | 1.882254 | 1.942653 | 2.508271 |
| 1    | 1.866156 | 2.748154 | 1.980335 |
| 8    | 2.36494  | -0.59618 | 2.790973 |
| 1    | 2.656723 | -0.24957 | 3.623691 |
| 8    | -1.78537 | 2.512285 | 2.019719 |
| 1    | -1.19654 | 1.781674 | 1.868304 |
| 1    | -2.64965 | 2.127207 | 2.148012 |
| 8    | -0.94747 | 2.55591  | -2.59016 |
| 1    | -1.75145 | 2.052238 | -2.67224 |
| 1    | -0.30033 | 1.927799 | -2.28667 |
| 8    | 4.087545 | -2.43315 | 1.221519 |
| 1    | 3.603298 | -1.90208 | 1.847377 |
| 1    | 4.283535 | -1.84599 | 0.501393 |
| 8    | 1.845272 | 3.958958 | 0.570001 |
| 1    | 2.264508 | 3.617108 | -0.21268 |
| 1    | 0.941505 | 4.170684 | 0.3212   |
| 8    | 1.831975 | -2.77641 | -2.47283 |
| 1    | 1.049559 | -2.50185 | -1.99198 |
| 1    | 2.156989 | -3.49875 | -1.94176 |
| 14   | -0.13579 | -0.47677 | -0.26598 |
| 8    | -1.39841 | -2.9717  | 1.88329  |
| 1    | -0.7824  | -2.71579 | 2.557346 |
| 8    | -1.63545 | 0.12312  | -0.54707 |
| 8    | -0.09345 | -2.03621 | -0.39236 |
| 1    | -0.95737 | -2.76463 | 1.047936 |
| 8    | -4.35255 | 1.068303 | 2.20204  |
| 1    | -4.47395 | 0.920395 | 1.269142 |
| 1    | -4.22905 | 0.19433  | 2.556289 |
| 14   | -2.94154 | -0.47859 | -1.28932 |
| 8    | -3.24193 | 0.526616 | -2.55216 |
| 1    | -4.11195 | 0.513216 | -2.92473 |
| 8    | -4.28488 | -0.42733 | -0.35968 |
| 1    | -4.34633 | -1.11146 | 0.306045 |
| 8    | -2.64437 | -2.00929 | -1.74548 |
| 1    | -1.7934  | -2.34717 | -1.45902 |
| 8    | 1.96102  | -4.17604 | 0.067571 |
| 1    | 2.685116 | -3.74557 | 0.514143 |
| 1    | 1.23555  | -3.5542  | 0.086497 |
| 8    | -4.02625 | -2.03033 | 2.015606 |
| 1    | -4.55399 | -2.7904  | 2.220004 |
| 1    | -3.11236 | -2.33766 | 2.002011 |

#### 4TS-6

| Atom | x        | y        | z        |
|------|----------|----------|----------|
| 14   | -2.03986 | -1.63424 | -0.55796 |
| 14   | 0.959033 | -1.48142 | -1.11921 |
| 8    | 1.918645 | -2.82294 | -1.15372 |
| 1    | 1.793648 | -3.42843 | -1.87114 |
| 8    | 4.338038 | -1.77614 | 0.337511 |
| 1    | 3.865171 | -1.2919  | 1.014402 |
| 8    | 1.327045 | -0.50122 | -2.36641 |
| 1    | 2.213029 | -0.13419 | -2.32638 |
| 8    | 1.31577  | -0.83128 | 0.308444 |
| 1    | 3.680109 | -2.31742 | -0.09144 |
| 8    | -2.57355 | -0.14927 | -0.92232 |
| 8    | -0.58735 | -1.90923 | -1.24042 |
| 8    | -1.89726 | -1.75285 | 1.085106 |
| 1    | -1.22948 | -1.19817 | 1.477663 |
| 8    | -3.05301 | -2.77644 | -1.08077 |
| 1    | -3.98358 | -2.67581 | -0.88515 |
| 8    | -4.53605 | -0.67785 | 1.919902 |
| 1    | -4.32688 | 0.173081 | 1.535729 |
| 1    | -3.70389 | -1.14374 | 1.908066 |
| 8    | 6.659148 | -3.27318 | 1.322359 |
| 1    | 5.980877 | -2.7323  | 0.92163  |
| 1    | 6.224152 | -3.74368 | 2.0194   |
| 8    | 0.009986 | 1.900855 | -3.52126 |
| 1    | -0.83294 | 1.957086 | -3.08154 |
| 1    | 0.371496 | 1.055787 | -3.26767 |
| 8    | -5.73238 | -2.37716 | -0.03549 |
| 1    | -6.02653 | -3.13798 | 0.44614  |
| 1    | -5.48435 | -1.72571 | 0.624305 |
| 8    | 3.872046 | 0.51228  | -1.5872  |
| 1    | 3.594983 | 1.221626 | -1.01725 |
| 1    | 4.250694 | -0.15662 | -1.02124 |
| 14   | -2.04139 | 1.270683 | -0.26216 |
| 8    | -3.21742 | 1.69801  | 0.825331 |
| 1    | -2.86604 | 2.016656 | 1.655752 |
| 8    | -0.60722 | 1.127087 | 0.323708 |
| 8    | -2.11595 | 2.407669 | -1.48229 |
| 1    | -2.985   | 2.73813  | -1.6653  |
| 8    | -1.87574 | 1.964486 | 3.344699 |
| 1    | -1.10133 | 1.533285 | 2.982633 |
| 1    | -2.31102 | 1.31073  | 3.874966 |
| 14   | 1.42855  | 0.441845 | 1.304444 |
| 8    | 0.408892 | 0.309129 | 2.606525 |
| 1    | 0.896971 | 0.046343 | 3.376467 |
| 8    | 2.889974 | 0.06671  | 2.073479 |
| 1    | 3.458654 | 0.8119   | 2.209897 |
| 8    | 1.864525 | 1.88122  | 0.674968 |
| 1    | 1.173546 | 2.296103 | 0.158378 |
| 8    | 0.630563 | 3.773022 | -1.36    |
| 1    | 0.731046 | 3.270439 | -2.16655 |
| 1    | -0.29318 | 3.673303 | -1.1553  |
| 8    | 2.90717  | 4.775442 | 0.288352 |
| 1    | 2.205131 | 4.755055 | -0.35521 |
| 1    | 2.848874 | 3.92348  | 0.703183 |

**4R-6**

| Atom | x        | y        | z        |
|------|----------|----------|----------|
| 14   | -2.01845 | -1.59208 | -0.87069 |
| 14   | 0.932538 | -1.49917 | -1.2635  |
| 8    | 1.841414 | -2.87318 | -1.29573 |
| 1    | 1.820609 | -3.38168 | -2.09459 |
| 8    | 4.214153 | -2.0162  | 0.314428 |
| 1    | 3.687251 | -1.4852  | 0.923551 |
| 8    | 1.449274 | -0.45174 | -2.40185 |
| 1    | 2.334936 | -0.10406 | -2.25532 |
| 8    | 1.023829 | -0.93842 | 0.229564 |
| 1    | 3.582028 | -2.53758 | -0.17095 |
| 8    | -2.26276 | 0.008717 | -0.74093 |
| 8    | -0.60936 | -1.86777 | -1.62724 |
| 8    | -1.95551 | -2.23089 | 0.652185 |
| 1    | -1.146   | -2.08384 | 1.128719 |
| 8    | -3.20329 | -2.29847 | -1.70129 |
| 1    | -4.1103  | -2.14289 | -1.43952 |
| 8    | -4.4362  | -1.13884 | 1.862195 |
| 1    | -4.10255 | -0.24674 | 1.777885 |
| 1    | -3.66661 | -1.6849  | 1.726334 |
| 8    | 6.316269 | -3.57722 | 1.574794 |
| 1    | 5.70285  | -3.03461 | 1.079585 |
| 1    | 5.867642 | -3.78096 | 2.383333 |
| 8    | 0.009248 | 1.937437 | -3.30253 |
| 1    | -0.87161 | 1.840954 | -2.96179 |
| 1    | 0.450287 | 1.109291 | -3.12274 |
| 8    | -5.7966  | -1.87862 | -0.51571 |
| 1    | -6.25966 | -2.686   | -0.33941 |
| 1    | -5.47715 | -1.5611  | 0.332456 |
| 8    | 3.894311 | 0.480956 | -1.37822 |
| 1    | 3.477857 | 1.02617  | -0.71152 |
| 1    | 4.259566 | -0.26592 | -0.91019 |
| 14   | -1.80545 | 1.246434 | 0.221948 |
| 8    | -2.89106 | 1.299153 | 1.452592 |
| 1    | -2.53977 | 1.536711 | 2.313647 |
| 8    | -0.30588 | 1.129579 | 0.679782 |
| 8    | -1.98191 | 2.630476 | -0.66991 |
| 1    | -2.85339 | 3.001279 | -0.68586 |
| 8    | -1.58722 | 1.605608 | 3.927093 |
| 1    | -0.79134 | 1.203854 | 3.56309  |
| 1    | -1.93619 | 0.979522 | 4.546439 |
| 14   | 1.219145 | 0.419748 | 1.2019   |
| 8    | 0.549842 | 0.246499 | 2.749172 |
| 1    | 1.207442 | -0.13104 | 3.3169   |
| 8    | 2.757672 | -0.20573 | 1.829267 |
| 1    | 3.371904 | 0.499808 | 1.976812 |
| 8    | 2.066065 | 1.723279 | 0.580941 |
| 1    | 1.539506 | 2.386167 | 0.143742 |
| 8    | 0.68339  | 3.776923 | -1.14708 |
| 1    | 0.700172 | 3.295478 | -1.97331 |
| 1    | -0.20928 | 3.654681 | -0.8366  |
| 8    | 2.100507 | 6.27623  | -0.66247 |
| 1    | 1.56538  | 5.523121 | -0.9075  |
| 1    | 2.797928 | 5.918237 | -0.13098 |

**4TS-7**

| Atom | x        | y        | z        |
|------|----------|----------|----------|
| 14   | -2.21429 | -1.09908 | -1.07894 |
| 14   | 0.768228 | -1.28366 | -1.65049 |
| 8    | 1.356713 | -2.78357 | -1.94366 |
| 1    | 1.296018 | -3.10801 | -2.83124 |
| 8    | 4.226747 | -2.38896 | -0.71085 |
| 1    | 3.962992 | -1.94876 | 0.121472 |
| 8    | 1.400227 | -0.17407 | -2.65574 |
| 1    | 2.335348 | 0.030339 | -2.51271 |
| 8    | 1.051946 | -0.99171 | -0.09602 |
| 1    | 3.44522  | -2.83161 | -1.01811 |
| 8    | -2.30647 | 0.397789 | -0.44691 |
| 8    | -0.83899 | -1.26643 | -1.9147  |
| 8    | -2.22688 | -2.18197 | 0.167105 |
| 1    | -1.39063 | -2.49678 | 0.486564 |
| 8    | -3.46404 | -1.35949 | -2.05943 |
| 1    | -4.3457  | -1.18726 | -1.7286  |
| 8    | -4.5254  | -1.23849 | 1.787168 |
| 1    | -4.06677 | -0.43167 | 2.012979 |
| 1    | -3.83585 | -1.81606 | 1.472498 |
| 8    | 4.460024 | -3.44491 | 2.602275 |
| 1    | 4.806414 | -3.81218 | 1.800144 |
| 1    | 4.092147 | -2.59499 | 2.328142 |
| 8    | 0.023559 | 2.359195 | -2.97651 |
| 1    | -0.89848 | 2.15142  | -2.89779 |
| 1    | 0.48182  | 1.519945 | -2.99793 |
| 8    | -5.94577 | -0.97648 | -0.65933 |
| 1    | -6.57336 | -1.68373 | -0.71667 |
| 1    | -5.59172 | -1.00051 | 0.232934 |
| 8    | 3.96714  | 0.268107 | -1.76891 |
| 1    | 3.710011 | 0.676391 | -0.945   |
| 1    | 4.260267 | -0.61235 | -1.52664 |
| 14   | -1.71691 | 1.284388 | 0.780934 |
| 8    | -2.60284 | 0.965037 | 2.115249 |
| 1    | -2.10212 | 0.79374  | 2.918603 |
| 8    | -0.1698  | 0.993619 | 1.000162 |
| 8    | -1.85666 | 2.873163 | 0.38461  |
| 1    | -2.67927 | 3.303187 | 0.570993 |
| 8    | -0.87453 | 0.260333 | 4.225352 |
| 1    | -0.06047 | 0.08144  | 3.746166 |
| 1    | -1.04829 | -0.51185 | 4.745756 |
| 14   | 1.28253  | 0.190139 | 1.015844 |
| 8    | 1.318421 | -0.34806 | 2.55011  |
| 1    | 2.18049  | -0.79421 | 2.616344 |
| 8    | 3.487511 | -1.04981 | 1.498553 |
| 1    | 4.16497  | -0.40556 | 1.660006 |
| 8    | 2.3291   | 1.33767  | 0.511016 |
| 1    | 1.912333 | 2.15913  | 0.250664 |
| 8    | 0.881267 | 3.68894  | -0.55772 |
| 1    | 0.694824 | 3.36683  | -1.44052 |
| 1    | 0.043659 | 3.642423 | -0.10562 |
| 8    | 2.372507 | 6.182037 | -0.17188 |
| 1    | 1.823831 | 5.421465 | -0.35392 |
| 1    | 3.198091 | 5.828773 | 0.129098 |

**4R-7**

| Atom | x        | y        | z        |
|------|----------|----------|----------|
| 14   | -2.04017 | -1.18991 | -1.19883 |
| 14   | 0.846711 | -0.72092 | -1.86521 |
| 8    | 1.682115 | -2.06949 | -2.29487 |
| 1    | 1.67568  | -2.3219  | -3.20747 |
| 8    | 4.293226 | -1.78396 | -0.6935  |
| 1    | 4.08641  | -1.69079 | 0.236796 |
| 8    | 1.312942 | 0.558859 | -2.75972 |
| 1    | 2.223124 | 0.827697 | -2.59418 |
| 8    | 1.096366 | -0.56631 | -0.29366 |
| 1    | 3.498506 | -2.10411 | -1.1085  |
| 8    | -2.40071 | 0.152169 | -0.35414 |
| 8    | -0.74535 | -0.91754 | -2.1408  |
| 8    | -1.69853 | -2.40004 | -0.13131 |
| 1    | -0.82111 | -2.43532 | 0.231335 |
| 8    | -3.28082 | -1.61644 | -2.13122 |
| 1    | -4.14958 | -1.68302 | -1.73473 |
| 8    | -4.03709 | -2.22738 | 1.711826 |
| 1    | -3.74767 | -1.37695 | 2.037202 |
| 1    | -3.26583 | -2.58559 | 1.281793 |
| 8    | 5.330517 | -4.11168 | 1.222181 |
| 1    | 5.334753 | -3.68983 | 0.371036 |
| 1    | 4.784026 | -3.54418 | 1.757494 |
| 8    | -0.48031 | 2.850029 | -2.67926 |
| 1    | -1.34652 | 2.46741  | -2.62452 |
| 1    | 0.119371 | 2.121087 | -2.83181 |
| 8    | -5.67842 | -1.97187 | -0.58644 |
| 1    | -6.12876 | -2.79477 | -0.71839 |
| 1    | -5.25389 | -2.0313  | 0.27306  |
| 8    | 3.846584 | 1.001335 | -1.63492 |
| 1    | 3.473269 | 1.358331 | -0.83047 |
| 1    | 4.202479 | 0.147578 | -1.3937  |
| 14   | -1.96838 | 0.998425 | 0.966808 |
| 8    | -2.63109 | 0.292307 | 2.280135 |
| 1    | -2.01272 | 0.074038 | 2.988435 |
| 8    | -0.38155 | 1.097914 | 1.073667 |
| 8    | -2.51036 | 2.536506 | 0.796368 |
| 1    | -3.39672 | 2.732685 | 1.063297 |
| 8    | -0.58721 | -0.44858 | 4.049977 |
| 1    | 0.21897  | -0.39129 | 3.505533 |
| 1    | -0.57162 | -1.30685 | 4.449606 |
| 14   | 1.134382 | 0.441464 | 1.034072 |
| 8    | 1.515273 | -0.34492 | 2.316913 |
| 1    | 2.958613 | -1.27062 | 2.28871  |
| 8    | 3.835644 | -1.68875 | 2.180836 |
| 1    | 4.441269 | -1.10724 | 2.620658 |
| 8    | 2.096971 | 1.714605 | 0.603352 |
| 1    | 1.623345 | 2.522742 | 0.415787 |
| 8    | 0.256664 | 3.98477  | -0.1264  |
| 1    | 0.048616 | 3.734924 | -1.0276  |
| 1    | -0.5009  | 3.713358 | 0.3822   |
| 8    | 1.383964 | 6.598546 | 0.570734 |
| 1    | 0.935437 | 5.807044 | 0.279275 |
| 1    | 2.205235 | 6.299404 | 0.935342 |

**4R-8**

| Atom | x        | y        | z        |
|------|----------|----------|----------|
| 14   | -0.30309 | -1.48979 | -0.31538 |
| 14   | -4.31757 | 0.670775 | 0.460093 |
| 8    | -3.19381 | -0.20426 | 1.114824 |
| 1    | -1.67341 | -0.1076  | 0.821528 |
| 8    | -5.2139  | -0.21843 | -0.64722 |
| 1    | -4.95567 | -1.12755 | -0.69426 |
| 8    | -3.78609 | 1.985084 | -0.40659 |
| 1    | -3.02192 | 1.857734 | -0.95903 |
| 8    | -5.40433 | 1.302815 | 1.523941 |
| 1    | -6.1001  | 1.809966 | 1.126188 |
| 8    | 1.274894 | -1.78412 | -0.07529 |
| 8    | -0.69668 | -0.23143 | 0.639644 |
| 8    | -0.52652 | -1.14042 | -1.90012 |
| 1    | -0.83014 | -0.26042 | -2.11511 |
| 8    | -1.13622 | -2.85249 | -0.01046 |
| 1    | -1.60986 | -2.91066 | 0.818581 |
| 8    | 0.190804 | -3.82929 | -2.7188  |
| 1    | -0.25429 | -4.14574 | -1.94021 |
| 1    | -0.11457 | -2.93021 | -2.81261 |
| 8    | -6.57139 | 2.327154 | -1.39881 |
| 1    | -6.50261 | 1.381149 | -1.47701 |
| 1    | -5.66659 | 2.606833 | -1.29686 |
| 8    | 0.2031   | -1.26135 | 3.245264 |
| 1    | -0.13274 | -0.62833 | 2.617115 |
| 1    | -0.51884 | -1.87533 | 3.341175 |
| 8    | -2.50605 | -2.39318 | 2.478877 |
| 1    | -2.86947 | -1.57679 | 2.082259 |
| 1    | -3.22979 | -2.83272 | 2.902691 |
| 8    | -1.25352 | 1.67839  | -2.1242  |
| 1    | -1.23228 | 2.191089 | -2.92096 |
| 1    | -0.54215 | 2.001915 | -1.5685  |
| 14   | 2.69826  | -1.17508 | 0.381575 |
| 8    | 3.905938 | -2.07773 | -0.19352 |
| 1    | 3.710614 | -2.63587 | -0.947   |
| 8    | 2.828487 | 0.353547 | -0.15466 |
| 8    | 2.785229 | -1.11318 | 2.018261 |
| 1    | 2.002469 | -1.36679 | 2.510996 |
| 8    | 3.088127 | -3.60728 | -2.48958 |
| 1    | 3.289187 | -3.18231 | -3.31206 |
| 1    | 2.138123 | -3.73676 | -2.48929 |
| 14   | 2.409619 | 1.902419 | -0.32014 |
| 8    | 0.786356 | 2.033773 | -0.17147 |
| 1    | 0.307663 | 1.365991 | 0.321197 |
| 8    | 2.769404 | 2.5123   | -1.78208 |
| 1    | 3.495383 | 3.126774 | -1.82577 |
| 8    | 3.234206 | 2.796782 | 0.77859  |
| 1    | 3.527201 | 2.355489 | 1.578694 |
| 8    | 4.130238 | 1.215808 | 2.974935 |
| 1    | 3.673638 | 0.390531 | 2.80215  |
| 1    | 5.055107 | 1.011925 | 2.944467 |
| 8    | 4.671237 | 4.616506 | -0.87787 |
| 1    | 4.350759 | 4.165445 | -0.09805 |
| 1    | 4.247131 | 5.463669 | -0.88574 |

**4TS-9**

| Atom | x        | y        | z        |
|------|----------|----------|----------|
| 14   | -1.30605 | -0.10979 | -0.5725  |
| 14   | 1.242882 | 0.090472 | 1.025213 |
| 8    | 1.066967 | -1.29198 | 1.898692 |
| 1    | 0.156248 | -1.56649 | 1.956129 |
| 8    | 0.850683 | 1.352878 | 1.960023 |
| 1    | 0.716449 | 2.18476  | 1.500164 |
| 8    | -1.26913 | -0.86042 | -2.02824 |
| 1    | -2.1696  | -0.90671 | -2.33944 |
| 8    | 2.794286 | 0.142702 | 0.57696  |
| 8    | -3.58037 | -0.35608 | -1.08433 |
| 8    | 0.343257 | 0.032281 | -0.32095 |
| 8    | -1.74007 | 1.4798   | -0.51117 |
| 1    | -2.60881 | 1.666405 | -0.86806 |
| 8    | -1.65987 | -1.00817 | 0.774816 |
| 1    | -2.54961 | -0.91555 | 1.114118 |
| 8    | -4.37842 | 2.908793 | -0.72867 |
| 1    | -4.32908 | 3.073202 | 0.205324 |
| 1    | -5.04751 | 2.238169 | -0.83695 |
| 14   | -4.83407 | -0.6233  | -0.18632 |
| 8    | -6.05266 | 0.471946 | -0.47743 |
| 1    | -6.92062 | 0.197426 | -0.21783 |
| 8    | -5.54606 | -2.10066 | -0.309   |
| 1    | -4.9373  | -2.83142 | -0.27227 |
| 8    | -4.41    | -0.48238 | 1.427943 |
| 1    | -4.21159 | 0.398767 | 1.731667 |
| 8    | -3.07462 | 2.178373 | 1.974699 |
| 1    | -2.56754 | 2.296169 | 2.767108 |
| 1    | -2.4396  | 2.032674 | 1.27444  |
| 8    | -2.85864 | -3.62795 | -0.38506 |
| 1    | -2.72257 | -3.3791  | -1.29028 |
| 1    | -2.36375 | -2.97938 | 0.106577 |
| 8    | 3.522441 | -2.82904 | 2.131057 |
| 1    | 2.685757 | -2.37162 | 2.212839 |
| 1    | 3.408462 | -3.43712 | 1.412482 |
| 8    | 1.804914 | -0.82782 | -2.67561 |
| 1    | 1.195008 | -1.28382 | -3.24043 |
| 1    | 1.254899 | -0.47427 | -1.97762 |
| 8    | 0.385618 | 3.461158 | 0.169496 |
| 1    | 1.180093 | 3.514974 | -0.35743 |
| 1    | -0.26885 | 2.986333 | -0.33671 |
| 14   | 4.24696  | -0.18197 | -0.01986 |
| 8    | 4.180459 | -1.29199 | -1.21393 |
| 1    | 3.446451 | -1.24207 | -1.82908 |
| 8    | 4.847935 | 1.244977 | -0.56593 |
| 1    | 5.704731 | 1.169351 | -0.97445 |
| 8    | 5.271235 | -0.7623  | 1.108787 |
| 1    | 4.913593 | -1.48637 | 1.621996 |
| 8    | 7.171132 | -0.53941 | -1.24472 |
| 1    | 7.122726 | -0.78586 | -0.32709 |
| 1    | 6.539261 | -1.1026  | -1.6786  |
| 8    | 3.174712 | 3.656297 | -0.7356  |
| 1    | 3.675984 | 2.844043 | -0.78494 |
| 1    | 3.490147 | 4.096509 | 0.042137 |

**4R-9**

| Atom | x        | y        | z        |
|------|----------|----------|----------|
| 14   | -1.98063 | 1.153252 | -0.32166 |
| 14   | 0.853271 | 0.983892 | 1.22425  |
| 8    | 0.839321 | 0.078571 | 2.611377 |
| 1    | 0.220277 | 0.420807 | 3.255936 |
| 8    | 1.054252 | 2.539294 | 1.669168 |
| 1    | 1.057152 | 3.168409 | 0.94438  |
| 8    | -2.48835 | 1.650765 | 1.228279 |
| 1    | -1.63703 | 1.902505 | 2.940155 |
| 8    | 2.189764 | 0.474735 | 0.430499 |
| 8    | -2.34502 | -0.45817 | -0.70706 |
| 8    | -0.44454 | 0.697526 | 0.363421 |
| 8    | -1.12914 | 1.989083 | -1.53691 |
| 1    | -1.75867 | 2.458662 | -2.06795 |
| 8    | -1.06058 | 1.961415 | 3.702903 |
| 1    | -0.4179  | 2.617949 | 3.457264 |
| 8    | -4.77797 | -0.26804 | -2.95403 |
| 1    | -3.95143 | -0.46889 | -3.37238 |
| 1    | -4.82282 | -0.85506 | -2.20287 |
| 14   | -2.99632 | -1.67891 | 0.11452  |
| 8    | -4.45767 | -1.98459 | -0.59414 |
| 1    | -4.81791 | -2.84767 | -0.44492 |
| 8    | -2.18716 | -3.08266 | -0.01329 |
| 1    | -1.37396 | -3.16537 | 0.482977 |
| 8    | -3.14726 | -1.28206 | 1.691388 |
| 1    | -3.01304 | -0.36477 | 1.907621 |
| 8    | -3.48725 | 1.777755 | -0.93939 |
| 1    | -3.34174 | 2.055602 | 1.136594 |
| 1    | -3.94309 | 1.250034 | -1.58323 |
| 8    | 0.366511 | -2.75556 | 1.287931 |
| 1    | 0.852976 | -2.54405 | 0.492557 |
| 1    | 0.177891 | -1.91785 | 1.701449 |
| 8    | 2.857733 | -2.02655 | 2.901634 |
| 1    | 2.339632 | -1.2348  | 3.036058 |
| 1    | 2.217832 | -2.68119 | 2.641878 |
| 8    | -0.11696 | -0.70486 | -2.62071 |
| 1    | -0.86649 | -0.94004 | -2.07976 |
| 1    | -0.092   | 0.244751 | -2.5423  |
| 8    | 0.963931 | 3.844815 | -0.83394 |
| 1    | 1.766854 | 3.628996 | -1.30305 |
| 1    | 0.28136  | 3.265355 | -1.17098 |
| 14   | 2.974431 | -0.62031 | -0.438   |
| 8    | 1.951166 | -1.75788 | -1.01959 |
| 1    | 1.275453 | -1.45121 | -1.63356 |
| 8    | 3.733433 | 0.17345  | -1.65671 |
| 1    | 4.339842 | -0.36824 | -2.15484 |
| 8    | 4.111636 | -1.40621 | 0.428324 |
| 1    | 3.870695 | -1.66128 | 1.321809 |
| 8    | 5.244617 | -2.3302  | -2.09003 |
| 1    | 5.247105 | -2.28799 | -1.13722 |
| 1    | 4.541072 | -2.92781 | -2.31028 |
| 8    | 3.600708 | 3.062485 | -1.89411 |
| 1    | 3.622343 | 2.106669 | -1.89998 |
| 1    | 4.145693 | 3.320684 | -1.16298 |



#### 4TS-10

| Atom | x        | y        | z        |
|------|----------|----------|----------|
| 14   | 1.675451 | 0.9812   | 0.156153 |
| 14   | -1.14726 | 1.402869 | -1.15709 |
| 8    | -1.32462 | 1.259572 | -2.78042 |
| 1    | -0.69336 | 1.795313 | -3.25608 |
| 8    | -1.33503 | 2.962538 | -0.7614  |
| 1    | -1.33884 | 3.202905 | 0.169794 |
| 8    | 2.485757 | 2.169703 | -0.62807 |
| 1    | 1.525249 | 2.975361 | -2.27514 |
| 8    | -2.2867  | 0.476385 | -0.46639 |
| 8    | 2.302096 | -0.50881 | -0.0413  |
| 8    | 0.299509 | 0.808483 | -0.75071 |
| 8    | 1.029411 | 1.378493 | 1.619262 |
| 1    | 1.775547 | 1.582986 | 2.190798 |
| 8    | 0.840005 | 3.300014 | -2.85647 |
| 1    | 0.272949 | 3.814395 | -2.2928  |
| 8    | 2.846305 | -0.91689 | 3.349585 |
| 1    | 3.099051 | -0.08362 | 2.931486 |
| 1    | 3.189689 | -1.57012 | 2.750779 |
| 14   | 3.495027 | -1.52331 | -0.38402 |
| 8    | 3.859909 | -2.35794 | 0.981328 |
| 1    | 4.672501 | -2.84385 | 0.969575 |
| 8    | 3.015371 | -2.5037  | -1.5944  |
| 1    | 2.07309  | -2.5962  | -1.72248 |
| 8    | 4.89742  | -0.83144 | -0.86691 |
| 1    | 4.947801 | -0.56867 | -1.77501 |
| 8    | 3.511027 | 1.36286  | 1.723985 |
| 1    | 3.219513 | 2.412138 | -0.06504 |
| 1    | 4.445099 | 1.229563 | 1.64175  |
| 8    | 0.151588 | -2.09338 | -1.68484 |
| 1    | -0.33738 | -2.37669 | -0.91494 |
| 1    | 0.38154  | -1.19008 | -1.4777  |
| 8    | -2.20104 | -1.49422 | -3.38607 |
| 1    | -2.04892 | -0.55416 | -3.44909 |
| 1    | -1.37342 | -1.85007 | -3.07053 |
| 8    | -0.09723 | -0.98318 | 2.796567 |
| 1    | 0.752918 | -1.28056 | 3.117198 |
| 1    | 0.103337 | -0.10112 | 2.493615 |
| 8    | -1.19892 | 3.270014 | 2.003974 |
| 1    | -1.95864 | 2.837286 | 2.389707 |
| 1    | -0.45457 | 2.682124 | 2.103492 |
| 14   | -2.85141 | -0.91506 | 0.121563 |
| 8    | -1.64788 | -1.89628 | 0.621218 |
| 1    | -1.12837 | -1.6669  | 1.399458 |
| 8    | -3.86849 | -0.53006 | 1.346944 |
| 1    | -4.46616 | -1.22843 | 1.602963 |
| 8    | -3.70502 | -1.73593 | -1.00135 |
| 1    | -3.35187 | -1.73402 | -1.89527 |
| 8    | -5.28735 | -3.07857 | 0.993899 |
| 1    | -5.02568 | -2.86329 | 0.101164 |
| 1    | -4.73391 | -3.80243 | 1.256083 |
| 8    | -3.76689 | 2.047269 | 2.673881 |
| 1    | -3.78273 | 1.153463 | 2.334745 |
| 1    | -4.32364 | 2.545252 | 2.090501 |

#### 4R-10

| Atom | x        | y        | z        |
|------|----------|----------|----------|
| 14   | -1.71337 | 0.630287 | -0.16146 |
| 14   | 1.069522 | 1.37305  | 1.149125 |
| 8    | 1.015549 | 0.751897 | 2.659538 |
| 1    | 0.205828 | 0.955745 | 3.135425 |
| 8    | 1.058469 | 2.994441 | 1.194586 |
| 1    | 0.682007 | 3.428532 | 0.426467 |
| 8    | -2.72452 | 0.797402 | 1.023445 |
| 1    | -2.07337 | 1.234724 | 2.625239 |
| 8    | 2.461828 | 0.833515 | 0.502302 |
| 8    | -1.80344 | -0.92291 | -0.77578 |
| 8    | -0.14309 | 0.819325 | 0.247076 |
| 8    | -1.88088 | 1.618901 | -1.47362 |
| 1    | -2.72661 | 1.522865 | -1.91243 |
| 8    | -1.59907 | 1.490361 | 3.43196  |
| 1    | -1.67538 | 2.433034 | 3.489433 |
| 8    | -4.56577 | 0.764749 | -2.19023 |
| 1    | -4.98402 | 1.083379 | -1.3907  |
| 1    | -4.51163 | -0.18119 | -2.09441 |
| 14   | -2.72343 | -2.17179 | -0.2934  |
| 8    | -4.04211 | -2.1645  | -1.27828 |
| 1    | -4.64263 | -2.89273 | -1.20512 |
| 8    | -1.97741 | -3.60238 | -0.49788 |
| 1    | -1.2048  | -3.74119 | 0.042807 |
| 8    | -3.0998  | -1.98396 | 1.278066 |
| 1    | -3.17245 | -1.05724 | 1.523549 |
| 8    | -5.23974 | 1.728715 | 0.4599   |
| 1    | -4.37749 | 1.394501 | 0.750803 |
| 1    | -5.19471 | 2.670166 | 0.55171  |
| 8    | 0.413952 | -2.80201 | 1.224864 |
| 1    | 0.918875 | -2.39878 | 0.518801 |
| 1    | -0.16321 | -2.12462 | 1.557218 |
| 8    | 2.677116 | -1.68582 | 2.936518 |
| 1    | 2.208115 | -0.86435 | 3.073067 |
| 1    | 2.020197 | -2.29828 | 2.618258 |
| 8    | 0.268944 | -0.87657 | -2.80167 |
| 1    | -0.51745 | -1.01665 | -2.2767  |
| 1    | 0.228231 | 0.03467  | -3.06332 |
| 8    | 0.095024 | 3.801957 | -1.36841 |
| 1    | 0.868481 | 3.535306 | -1.85778 |
| 1    | -0.58847 | 3.15849  | -1.54779 |
| 14   | 3.20235  | -0.37133 | -0.27132 |
| 8    | 2.129162 | -1.49818 | -0.76909 |
| 1    | 1.558575 | -1.28256 | -1.51233 |
| 8    | 3.995705 | 0.305187 | -1.53293 |
| 1    | 4.742752 | -0.18717 | -1.86402 |
| 8    | 4.296667 | -1.11942 | 0.679906 |
| 1    | 3.963589 | -1.39009 | 1.539275 |
| 8    | 6.077979 | -1.76557 | -1.48259 |
| 1    | 5.796715 | -1.72455 | -0.57074 |
| 1    | 5.777483 | -2.6035  | -1.80832 |
| 8    | 2.933381 | 3.061432 | -1.92459 |
| 1    | 3.315945 | 2.190615 | -1.99705 |
| 1    | 3.070635 | 3.305241 | -1.0173  |

#### 4TS-11

| Atom | x        | y        | z        |
|------|----------|----------|----------|
| 14   | -1.32768 | 0.503472 | 0.799739 |
| 14   | 0.632239 | 2.43974  | -0.15266 |
| 8    | 1.097479 | 3.330301 | 1.137181 |
| 1    | 1.211422 | 2.837512 | 1.948653 |
| 8    | 0.706581 | 3.387811 | -1.48027 |
| 1    | 0.255882 | 4.222546 | -1.39824 |
| 8    | 0.006545 | -0.33459 | 1.062722 |
| 1    | 0.678578 | 0.591959 | 2.544525 |
| 8    | 1.590962 | 1.173906 | -0.39498 |
| 8    | -2.40843 | -0.23705 | -0.16731 |
| 8    | -0.8975  | 1.912007 | 0.053097 |
| 8    | -2.0949  | 0.918933 | 2.185158 |
| 1    | -2.73892 | 0.285844 | 2.500328 |
| 8    | 0.973642 | 1.23617  | 3.197351 |
| 1    | 0.209764 | 1.392583 | 3.739294 |
| 8    | -3.66908 | -1.47741 | 2.775886 |
| 1    | -2.89126 | -2.03262 | 2.803895 |
| 1    | -4.10802 | -1.70065 | 1.961217 |
| 14   | -2.90994 | -1.5715  | -0.92387 |
| 8    | -4.30057 | -2.11903 | -0.23517 |
| 1    | -5.08609 | -1.98339 | -0.74604 |
| 8    | -3.24567 | -1.23256 | -2.47538 |
| 1    | -2.72056 | -0.54765 | -2.89211 |
| 8    | -1.82055 | -2.76572 | -0.70068 |
| 1    | -0.92569 | -2.46093 | -0.85647 |
| 8    | -1.09858 | -2.78835 | 2.205247 |
| 1    | -0.64687 | -1.98833 | 1.934407 |
| 1    | -1.35336 | -3.19499 | 1.383028 |
| 8    | 4.23474  | -3.4239  | 0.765947 |
| 1    | 3.655096 | -2.66722 | 0.867297 |
| 1    | 3.795098 | -4.15206 | 1.183337 |
| 8    | 3.779999 | 0.163254 | 3.407267 |
| 1    | 3.769501 | -0.15871 | 2.514202 |
| 1    | 2.941896 | 0.599976 | 3.523217 |
| 8    | -1.52719 | 0.959724 | -3.23549 |
| 1    | -1.53331 | 1.409605 | -2.39823 |
| 1    | -0.6079  | 0.92828  | -3.49514 |
| 8    | -0.93307 | 5.255684 | 0.186021 |
| 1    | -0.27647 | 5.026034 | 0.836694 |
| 1    | -1.64805 | 4.647814 | 0.332723 |
| 14   | 1.643188 | -0.45883 | -0.42938 |
| 8    | 0.459712 | -1.26446 | -1.28581 |
| 1    | 0.748852 | -1.4145  | -2.17689 |
| 8    | 2.868364 | -0.55485 | -1.56801 |
| 1    | 3.320121 | -1.37966 | -1.72014 |
| 8    | 2.354323 | -1.26526 | 0.83494  |
| 1    | 1.73366  | -1.37438 | 1.544523 |
| 8    | 4.507654 | -2.96729 | -2.01914 |
| 1    | 5.363695 | -2.59106 | -2.17208 |
| 1    | 4.514547 | -3.29137 | -1.11858 |
| 8    | 1.453825 | 1.264634 | -3.56915 |
| 1    | 2.088595 | 0.742101 | -3.08366 |
| 1    | 1.414116 | 2.097138 | -3.10882 |

#### 4R-11

| Atom | x        | y        | z        |
|------|----------|----------|----------|
| 14   | -1.08571 | -0.00679 | 1.147683 |
| 14   | 1.418113 | 1.421122 | 0.711051 |
| 8    | 2.473519 | 1.256466 | 1.97362  |
| 1    | 2.232756 | 0.531989 | 2.54696  |
| 8    | 1.689641 | 2.896501 | 0.068618 |
| 1    | 2.041528 | 3.564308 | 0.651041 |
| 8    | -0.29162 | -1.12538 | 0.302182 |
| 1    | 1.087894 | -1.59997 | 1.92256  |
| 8    | 1.62697  | 0.305956 | -0.41111 |
| 8    | -2.47289 | 0.471042 | 0.472979 |
| 8    | -0.09564 | 1.292263 | 1.29249  |
| 8    | -1.40005 | -0.55379 | 2.65795  |
| 1    | -2.28042 | -0.90707 | 2.793985 |
| 8    | 1.424291 | -1.39024 | 2.791165 |
| 1    | 0.63311  | -1.29408 | 3.314042 |
| 8    | -4.00151 | -1.78796 | 2.441976 |
| 1    | -3.66405 | -2.43126 | 1.819995 |
| 1    | -4.53954 | -1.1982  | 1.923294 |
| 14   | -3.63497 | 0.368714 | -0.64768 |
| 8    | -5.06752 | 0.071281 | 0.104685 |
| 1    | -5.71364 | 0.759598 | 0.033002 |
| 8    | -3.80031 | 1.778474 | -1.42871 |
| 1    | -3.00423 | 2.259712 | -1.66393 |
| 8    | -3.33869 | -0.92278 | -1.59466 |
| 1    | -2.4212  | -0.95583 | -1.88268 |
| 8    | -2.6177  | -3.14274 | 0.24455  |
| 1    | -1.77232 | -2.70202 | 0.264105 |
| 1    | -3.06868 | -2.7403  | -0.49206 |
| 8    | 4.215666 | -3.01637 | -0.55456 |
| 1    | 3.27387  | -2.96827 | -0.71319 |
| 1    | 4.350881 | -2.62024 | 0.302428 |
| 8    | 4.301365 | -1.49093 | 2.011138 |
| 1    | 4.186347 | -0.59457 | 1.718137 |
| 1    | 3.497893 | -1.69918 | 2.477379 |
| 8    | -1.27226 | 3.0718   | -1.87676 |
| 1    | -0.86363 | 3.240413 | -1.03663 |
| 1    | -0.56628 | 2.725828 | -2.42404 |
| 8    | 2.880798 | 4.074279 | 2.479256 |
| 1    | 2.984185 | 3.133752 | 2.606393 |
| 1    | 2.263434 | 4.364451 | 3.137126 |
| 14   | 0.783072 | -0.93344 | -1.19036 |
| 8    | -0.64064 | -0.62335 | -2.0451  |
| 1    | -0.42043 | -0.503   | -2.95998 |
| 8    | 1.649143 | -0.71776 | -2.65626 |
| 1    | 2.574864 | -0.935   | -2.68216 |
| 8    | 1.375935 | -2.47663 | -0.90464 |
| 1    | 0.892535 | -2.93698 | -0.23479 |
| 8    | 4.658231 | -1.14266 | -2.66314 |
| 1    | 4.923065 | -0.33901 | -2.23774 |
| 1    | 4.678832 | -1.82157 | -1.98722 |
| 8    | 1.297507 | 2.17686  | -2.99015 |
| 1    | 1.485956 | 1.236636 | -3.00379 |
| 1    | 1.726261 | 2.500728 | -2.20603 |

#### 4TS-12

| Atom | x        | y        | z        |
|------|----------|----------|----------|
| 14   | 1.55178  | -0.04055 | -1.45993 |
| 14   | -1.01115 | 1.357196 | -1.08406 |
| 8    | -2.26313 | 1.417406 | -2.13246 |
| 1    | -2.68049 | 0.587202 | -2.35822 |
| 8    | -0.93285 | 2.807626 | -0.35176 |
| 1    | -1.47422 | 3.506188 | -0.71194 |
| 8    | 0.781515 | -1.30252 | -0.75333 |
| 1    | -2.84122 | -1.65533 | -1.46287 |
| 8    | -1.20778 | 0.174481 | 0.007195 |
| 8    | 2.542405 | 0.622041 | -0.36437 |
| 8    | 0.390472 | 1.033266 | -1.84785 |
| 8    | 2.360015 | -0.48901 | -2.77867 |
| 1    | 3.279755 | -0.73352 | -2.66136 |
| 8    | -3.29506 | -1.26117 | -2.20445 |
| 1    | -3.89868 | -1.93253 | -2.49773 |
| 8    | 4.948347 | -1.34    | -1.88127 |
| 1    | 4.625535 | -2.08045 | -1.37048 |
| 1    | 5.226514 | -0.69694 | -1.23603 |
| 14   | 3.421847 | 0.565084 | 0.99512  |
| 8    | 5.009338 | 0.464613 | 0.573664 |
| 1    | 5.57725  | 1.105489 | 0.97818  |
| 8    | 3.259997 | 1.911144 | 1.869819 |
| 1    | 2.375481 | 2.229169 | 2.077155 |
| 8    | 3.07306  | -0.8185  | 1.78918  |
| 1    | 2.146841 | -1.00869 | 1.950808 |
| 8    | 3.401991 | -3.06963 | -0.09173 |
| 1    | 2.523671 | -2.90993 | -0.418   |
| 1    | 3.459018 | -2.53309 | 0.695447 |
| 8    | -4.37689 | -3.42444 | -0.21553 |
| 1    | -3.55161 | -3.22494 | 0.212708 |
| 1    | -4.93667 | -2.66564 | -0.06133 |
| 8    | -5.64487 | -0.76699 | -0.15495 |
| 1    | -5.32186 | -0.35219 | 0.647854 |
| 1    | -5.052   | -0.47783 | -0.83788 |
| 8    | 0.576922 | 2.644603 | 2.238616 |
| 1    | 0.12627  | 2.858831 | 1.427272 |
| 1    | -0.0627  | 2.16304  | 2.766103 |
| 8    | -2.68955 | 4.253318 | -2.18489 |
| 1    | -2.87603 | 3.34134  | -2.39706 |
| 1    | -2.20288 | 4.600491 | -2.92018 |
| 14   | -0.47703 | -1.24419 | 0.334483 |
| 8    | 0.297512 | -1.35971 | 1.75744  |
| 1    | -0.40889 | -1.31981 | 2.421086 |
| 8    | -2.14867 | -1.16911 | 2.345603 |
| 1    | -2.45194 | -1.99781 | 2.693395 |
| 8    | -1.4279  | -2.50402 | -0.14617 |
| 1    | -0.97927 | -3.09285 | -0.7399  |
| 8    | -4.37921 | 0.294865 | 2.140469 |
| 1    | -3.56332 | -0.2506  | 2.148463 |
| 1    | -4.78685 | 0.156078 | 2.984119 |
| 8    | -1.63903 | 1.297032 | 3.542526 |
| 1    | -1.75565 | 0.385789 | 3.243924 |
| 1    | -2.38556 | 1.750362 | 3.171255 |

#### 4R-12

| Atom | x        | y        | z        |
|------|----------|----------|----------|
| 14   | -1.18105 | -1.49665 | -0.40393 |
| 14   | 1.458726 | -1.24587 | 0.926056 |
| 8    | 2.716845 | -2.26582 | 0.747373 |
| 1    | 2.882428 | -2.60812 | -0.13621 |
| 8    | 1.47395  | -0.78739 | 2.498064 |
| 1    | 2.011936 | -1.31471 | 3.08574  |
| 8    | -0.53857 | -0.4138  | -1.44341 |
| 1    | 2.163285 | -3.29452 | -2.32672 |
| 8    | 1.582418 | 0.06981  | -0.01137 |
| 8    | -2.2938  | -0.76029 | 0.511182 |
| 8    | 0.052524 | -1.97496 | 0.552257 |
| 8    | -1.80419 | -2.7744  | -1.16699 |
| 1    | -2.69455 | -2.66129 | -1.50444 |
| 8    | 2.984835 | -3.0208  | -1.93995 |
| 1    | 3.251938 | -2.22356 | -2.40779 |
| 8    | -4.36707 | -1.78858 | -2.0469  |
| 1    | -4.06489 | -1.04823 | -2.57163 |
| 1    | -4.75027 | -1.38984 | -1.27119 |
| 14   | -3.30528 | 0.487992 | 0.758953 |
| 8    | -4.83129 | 0.020913 | 0.340731 |
| 1    | -5.44422 | -0.00726 | 1.062087 |
| 8    | -3.37626 | 0.849127 | 2.335085 |
| 1    | -2.57201 | 0.84219  | 2.85997  |
| 8    | -2.91113 | 1.706836 | -0.23551 |
| 1    | -1.96655 | 1.93963  | -0.28893 |
| 8    | -3.04312 | 0.628661 | -3.01741 |
| 1    | -2.13441 | 0.353233 | -2.96322 |
| 1    | -3.16486 | 1.181969 | -2.24892 |
| 8    | 3.621768 | -0.5244  | -3.11281 |
| 1    | 2.794533 | -0.04634 | -3.09103 |
| 1    | 4.158655 | -0.06002 | -2.47388 |
| 8    | 4.399572 | 1.160469 | -0.82138 |
| 1    | 4.072487 | 2.025272 | -1.05231 |
| 1    | 3.680045 | 0.748259 | -0.35418 |
| 8    | -0.91456 | 0.739668 | 3.729388 |
| 1    | -0.39235 | -0.0013  | 3.439934 |
| 1    | -0.32353 | 1.483924 | 3.626159 |
| 8    | 3.304553 | -2.83333 | 3.477242 |
| 1    | 3.432325 | -2.86074 | 2.530638 |
| 1    | 2.891063 | -3.65319 | 3.711234 |
| 14   | 0.495054 | 0.817148 | -1.04686 |
| 8    | -0.22357 | 2.040348 | -0.3998  |
| 1    | 0.516494 | 3.322725 | 0.278231 |
| 8    | 1.079803 | 4.038553 | 0.654184 |
| 1    | 0.506518 | 4.773136 | 0.825493 |
| 8    | 1.340429 | 1.145624 | -2.42524 |
| 1    | 1.680547 | 2.034667 | -2.45583 |
| 8    | 2.849141 | 3.639225 | -1.53811 |
| 1    | 2.311848 | 3.899986 | -0.78494 |
| 1    | 3.170772 | 4.436779 | -1.93511 |
| 8    | 1.436679 | 2.333557 | 3.076319 |
| 1    | 1.384041 | 2.920032 | 2.325066 |
| 1    | 1.742695 | 1.498547 | 2.739079 |

#### 4R-13

| Atom | x        | y        | z        |
|------|----------|----------|----------|
| 14   | 1.277302 | 0.22682  | 0.619497 |
| 14   | 0.605342 | 3.04059  | -0.16194 |
| 8    | -0.68182 | 2.346721 | -0.90897 |
| 1    | -0.60491 | 1.381188 | -0.83931 |
| 8    | 1.636787 | 3.805312 | -1.15749 |
| 1    | 2.413075 | 3.307756 | -1.41505 |
| 8    | 1.205653 | -0.35556 | 2.147842 |
| 1    | 0.375976 | -0.2075  | 2.606896 |
| 8    | -0.02332 | 4.194338 | 0.828089 |
| 1    | 0.484979 | 4.989715 | 0.905011 |
| 8    | 2.755602 | -0.27196 | 0.078285 |
| 8    | 1.370757 | 1.876463 | 0.652951 |
| 8    | -0.20405 | -1.21487 | -2.75917 |
| 1    | 0.258522 | -0.78015 | -3.46261 |
| 8    | 0.089563 | -0.19244 | -0.3289  |
| 1    | 0.055537 | -0.7797  | -1.92617 |
| 8    | 3.794011 | 1.908079 | -1.63238 |
| 1    | 4.703227 | 2.055621 | -1.40943 |
| 1    | 3.520713 | 1.164105 | -1.09689 |
| 14   | 3.700641 | -1.58589 | 0.283635 |
| 8    | 5.251298 | -1.11999 | 0.020915 |
| 1    | 5.719134 | -1.65845 | -0.6017  |
| 8    | 3.488944 | -2.12207 | 1.80438  |
| 1    | 2.796646 | -1.69001 | 2.297699 |
| 8    | 3.439109 | -2.73442 | -0.83332 |
| 1    | 2.574865 | -3.13208 | -0.94394 |
| 8    | 0.762831 | -3.64874 | -1.40376 |
| 1    | 0.088823 | -3.65466 | -0.73338 |
| 1    | 0.474734 | -2.9814  | -2.02211 |
| 8    | -1.42433 | 0.30984  | 3.059013 |
| 1    | -1.61187 | 1.246759 | 3.081131 |
| 1    | -2.07087 | -0.06454 | 2.467894 |
| 8    | -3.39104 | 2.455081 | 0.059871 |
| 1    | -2.47435 | 2.539054 | -0.20351 |
| 1    | -3.86905 | 2.525449 | -0.76098 |
| 8    | -2.13931 | 3.159804 | 2.686095 |
| 1    | -1.42654 | 3.602336 | 2.234487 |
| 1    | -2.83748 | 3.089147 | 2.043173 |
| 8    | -3.10209 | -4.71768 | 1.620345 |
| 1    | -2.26861 | -4.26776 | 1.556359 |
| 1    | -3.70489 | -4.14414 | 1.160387 |
| 14   | -3.02578 | -1.47925 | -0.30639 |
| 8    | -1.63447 | -2.20487 | 0.119856 |
| 1    | -0.89999 | -1.56808 | 0.118455 |
| 8    | -2.9154  | -0.86977 | -1.82983 |
| 1    | -2.08724 | -1.03332 | -2.28333 |
| 8    | -3.43096 | -0.32377 | 0.758558 |
| 1    | -3.49132 | 0.595599 | 0.498778 |
| 8    | -4.21233 | -2.61661 | -0.27337 |
| 1    | -4.3422  | -3.10564 | -1.07365 |
| 8    | -3.35844 | 1.906829 | -2.82624 |
| 1    | -3.33873 | 0.978189 | -2.60658 |
| 1    | -2.45939 | 2.20287  | -2.7411  |

#### 4TS-14

| Atom | x        | y        | z        |
|------|----------|----------|----------|
| 14   | 0.875298 | 0.012802 | -0.75859 |
| 14   | -0.26469 | -2.55165 | 0.580497 |
| 8    | -1.68994 | -1.85625 | 1.001317 |
| 1    | -1.86647 | -1.02726 | 0.549916 |
| 8    | 0.625488 | -2.98321 | 1.869823 |
| 1    | 1.313888 | -2.38363 | 2.151397 |
| 8    | 0.962319 | 0.104282 | -2.39451 |
| 1    | 0.16303  | -0.14078 | -2.86204 |
| 8    | -0.67193 | -3.95132 | -0.18435 |
| 1    | -0.05195 | -4.66265 | -0.10518 |
| 8    | 2.438435 | 0.241488 | -0.29007 |
| 8    | 0.53463  | -1.56051 | -0.38971 |
| 8    | 1.418951 | 1.709412 | 2.289951 |
| 1    | 1.78279  | 0.868846 | 2.550605 |
| 8    | -0.06649 | 1.011832 | 0.005648 |
| 1    | 1.012684 | 1.541875 | 1.432878 |
| 8    | 2.771315 | -1.11238 | 2.533045 |
| 1    | 3.350282 | -1.36288 | 3.240355 |
| 1    | 3.320742 | -1.02758 | 1.754128 |
| 14   | 3.953055 | 0.215781 | -0.81987 |
| 8    | 4.725922 | -0.80145 | 0.238586 |
| 1    | 5.66331  | -0.69176 | 0.313594 |
| 8    | 4.045238 | -0.37627 | -2.33185 |
| 1    | 3.229561 | -0.33357 | -2.82197 |
| 8    | 4.673428 | 1.669125 | -0.74937 |
| 1    | 4.41923  | 2.244854 | -0.02706 |
| 8    | 3.680241 | 3.23346  | 1.459155 |
| 1    | 3.351808 | 4.085901 | 1.207454 |
| 1    | 2.922174 | 2.749192 | 1.798981 |
| 8    | -1.71737 | -0.61959 | -3.12417 |
| 1    | -1.97779 | -1.5332  | -3.01973 |
| 1    | -2.09573 | -0.16764 | -2.376   |
| 8    | -4.33759 | -2.51895 | 0.066903 |
| 1    | -3.50326 | -2.4572  | 0.528168 |
| 1    | -5.01397 | -2.44525 | 0.72645  |
| 8    | -2.67951 | -3.31079 | -2.32313 |
| 1    | -2.01676 | -3.68073 | -1.74743 |
| 1    | -3.43328 | -3.14519 | -1.76539 |
| 8    | -3.94837 | 4.788897 | -1.50361 |
| 1    | -3.02579 | 4.573903 | -1.58137 |
| 1    | -4.2769  | 4.082391 | -0.95831 |
| 14   | -2.32839 | 1.845183 | 0.235339 |
| 8    | -1.63566 | 2.935107 | -0.75918 |
| 1    | -0.73807 | 2.672438 | -0.93764 |
| 8    | -1.89203 | 1.796232 | 1.816202 |
| 1    | -0.97164 | 1.62606  | 1.978192 |
| 8    | -2.65976 | 0.364735 | -0.44836 |
| 1    | -3.59186 | 0.176978 | -0.4496  |
| 8    | -3.88499 | 2.43494  | 0.394217 |
| 1    | -4.08021 | 2.791604 | 1.249293 |
| 8    | -3.15671 | -0.54929 | 3.319912 |
| 1    | -2.85818 | 0.305551 | 3.025701 |
| 1    | -2.60654 | -1.16583 | 2.849732 |

**4R-14**

| Atom | x        | y        | z        |
|------|----------|----------|----------|
| 14   | 0.679506 | -0.00452 | -0.80746 |
| 14   | -0.67659 | -2.39073 | 0.732306 |
| 8    | -2.07122 | -1.61821 | 1.094767 |
| 1    | -2.20686 | -0.80148 | 0.598894 |
| 8    | 0.181418 | -2.81294 | 2.044851 |
| 1    | 0.923781 | -2.26501 | 2.290128 |
| 8    | 0.638575 | -0.03516 | -2.43521 |
| 1    | -0.19707 | -0.27666 | -2.84319 |
| 8    | -1.10014 | -3.7976  | -0.00492 |
| 1    | -0.55833 | -4.54796 | 0.195058 |
| 8    | 2.272866 | 0.135221 | -0.44727 |
| 8    | 0.188668 | -1.45676 | -0.24803 |
| 8    | 1.918371 | 1.731706 | 2.142253 |
| 1    | 2.063369 | 0.829186 | 2.413793 |
| 8    | -0.05434 | 1.192279 | -0.0654  |
| 1    | 1.502715 | 1.659448 | 1.28613  |
| 8    | 2.563107 | -1.19914 | 2.543196 |
| 1    | 3.08103  | -1.45314 | 3.295467 |
| 1    | 3.119148 | -1.32094 | 1.772208 |
| 14   | 3.732871 | -0.29439 | -0.97041 |
| 8    | 4.255071 | -1.39333 | 0.158285 |
| 1    | 5.166666 | -1.64679 | 0.115435 |
| 8    | 3.655286 | -0.99576 | -2.43436 |
| 1    | 2.845543 | -0.85583 | -2.91459 |
| 8    | 4.773246 | 0.946242 | -1.01767 |
| 1    | 4.779445 | 1.545535 | -0.27059 |
| 8    | 4.495548 | 2.620531 | 1.310289 |
| 1    | 4.471227 | 3.557541 | 1.171252 |
| 1    | 3.638512 | 2.380389 | 1.671801 |
| 8    | -2.04414 | -0.63258 | -3.04821 |
| 1    | -2.38059 | -1.51438 | -2.89316 |
| 1    | -2.32982 | -0.11338 | -2.30109 |
| 8    | -4.64811 | -2.74775 | 0.321093 |
| 1    | -3.82801 | -2.46918 | 0.725144 |
| 1    | -5.32041 | -2.1737  | 0.661945 |
| 8    | -3.08777 | -3.24037 | -2.16357 |
| 1    | -2.40166 | -3.61209 | -1.61791 |
| 1    | -3.81853 | -3.09999 | -1.5675  |
| 8    | -3.60511 | 4.905811 | -1.57269 |
| 1    | -2.68589 | 4.807352 | -1.78908 |
| 1    | -3.71311 | 4.229098 | -0.90721 |
| 14   | -1.62775 | 2.077391 | 0.17677  |
| 8    | -1.13699 | 3.247036 | -0.90704 |
| 1    | -0.29139 | 3.057668 | -1.28399 |
| 8    | -1.30231 | 2.202836 | 1.819462 |
| 1    | -0.41841 | 1.992363 | 2.085559 |
| 8    | -2.43214 | 0.685752 | -0.41634 |
| 1    | -3.36138 | 0.881146 | -0.38397 |
| 8    | -3.178   | 2.826138 | 0.414219 |
| 1    | -3.23375 | 3.27544  | 1.244645 |
| 8    | -2.71758 | 0.198734 | 3.572031 |
| 1    | -2.36523 | 0.953119 | 3.106714 |
| 1    | -2.50816 | -0.54763 | 3.023147 |

**4TS-15**

| Atom | x        | y        | z        |
|------|----------|----------|----------|
| 14   | 0.633524 | -0.0462  | -1.00146 |
| 14   | -0.56098 | -2.30868 | 0.914414 |
| 8    | -2.00362 | -1.64621 | 1.294422 |
| 1    | -2.22318 | -0.84308 | 0.807146 |
| 8    | 0.343206 | -2.66927 | 2.21062  |
| 1    | 1.006925 | -2.03878 | 2.484321 |
| 8    | 0.660544 | -0.50377 | -2.5641  |
| 1    | -0.20627 | -0.72816 | -2.91183 |
| 8    | -0.87164 | -3.74752 | 0.180707 |
| 1    | -0.28269 | -4.45396 | 0.40662  |
| 8    | 2.197412 | 0.324855 | -0.65087 |
| 8    | 0.221984 | -1.30212 | -0.06525 |
| 8    | 1.961662 | 1.957111 | 1.772114 |
| 1    | 1.94269  | 1.217218 | 2.373701 |
| 8    | -0.23783 | 1.240311 | -0.68175 |
| 1    | 1.951238 | 1.55597  | 0.907627 |
| 8    | 2.597086 | -0.88649 | 2.611425 |
| 1    | 3.140886 | -1.03521 | 3.373259 |
| 1    | 3.138676 | -1.0603  | 1.841533 |
| 14   | 3.681023 | -0.16544 | -1.08269 |
| 8    | 4.133533 | -1.19805 | 0.133606 |
| 1    | 4.979285 | -1.61565 | 0.044636 |
| 8    | 3.647392 | -0.94201 | -2.50628 |
| 1    | 2.798228 | -0.98427 | -2.93701 |
| 8    | 4.73079  | 1.061645 | -1.16702 |
| 1    | 4.812775 | 1.643497 | -0.41142 |
| 8    | 4.629142 | 2.790657 | 1.157817 |
| 1    | 4.655367 | 3.717277 | 0.960403 |
| 1    | 3.762012 | 2.619738 | 1.529506 |
| 8    | -2.12248 | -0.95801 | -2.75628 |
| 1    | -2.46717 | -1.83417 | -2.58454 |
| 1    | -2.48256 | -0.39609 | -2.07434 |
| 8    | -4.55136 | -2.94767 | 0.612063 |
| 1    | -3.73713 | -2.61847 | 0.988617 |
| 1    | -5.17409 | -2.23553 | 0.671532 |
| 8    | -3.0338  | -3.57674 | -1.84847 |
| 1    | -2.27878 | -3.82852 | -1.32546 |
| 1    | -3.73289 | -3.4496  | -1.21172 |
| 8    | -4.62519 | 4.526108 | -1.09856 |
| 1    | -3.80789 | 4.542752 | -1.57854 |
| 1    | -4.426   | 3.893295 | -0.39605 |
| 14   | -1.65899 | 1.972897 | -0.05717 |
| 8    | -1.77084 | 3.159072 | -1.19265 |
| 1    | -1.0834  | 3.086629 | -1.83956 |
| 8    | -1.07798 | 2.347241 | 1.44316  |
| 1    | -0.12855 | 2.359063 | 1.510858 |
| 8    | -2.61316 | 0.605854 | -0.21013 |
| 1    | -3.46358 | 0.920922 | 0.109928 |
| 8    | -3.64008 | 2.666758 | 0.718724 |
| 1    | -3.51096 | 3.051536 | 1.58516  |
| 8    | -1.0459  | 0.380907 | 3.666181 |
| 1    | -1.23642 | 1.091446 | 3.05863  |
| 1    | -1.50172 | -0.37518 | 3.317768 |

#### 4R-15

| Atom | x        | y        | z        |
|------|----------|----------|----------|
| 14   | 0.687417 | 0.008614 | 0.911214 |
| 14   | -0.00725 | 2.55333  | -0.91439 |
| 8    | -1.31447 | 2.105571 | -1.77588 |
| 1    | -2.18026 | 2.222413 | -1.38636 |
| 8    | 1.192139 | 3.022133 | -1.88591 |
| 1    | 1.988174 | 2.495874 | -1.99486 |
| 8    | 0.944095 | 0.345548 | 2.483362 |
| 1    | 0.19656  | 0.686441 | 2.983441 |
| 8    | -0.45548 | 3.859638 | -0.00418 |
| 1    | 0.204111 | 4.534231 | 0.079309 |
| 8    | 2.07746  | -0.68207 | 0.413155 |
| 8    | 0.4601   | 1.361664 | 0.060136 |
| 8    | 0.879491 | -2.18917 | -2.38774 |
| 1    | 0.114509 | -1.68476 | -2.68007 |
| 8    | -0.5223  | -1.00282 | 0.661545 |
| 1    | 0.720562 | -2.36674 | -1.46826 |
| 8    | 3.586384 | 1.56198  | -2.10154 |
| 1    | 3.527279 | 0.672248 | -2.44061 |
| 1    | 3.892654 | 1.454859 | -1.20469 |
| 14   | 3.602733 | -0.77929 | 0.934066 |
| 8    | 4.283501 | 0.694805 | 0.602067 |
| 1    | 5.069353 | 0.910195 | 1.084627 |
| 8    | 3.695666 | -1.06583 | 2.533279 |
| 1    | 2.95162  | -0.74045 | 3.030918 |
| 8    | 4.403374 | -1.95387 | 0.155519 |
| 1    | 4.292216 | -1.94596 | -0.79294 |
| 8    | 3.513821 | -1.36815 | -2.60011 |
| 1    | 3.823314 | -1.77069 | -3.40026 |
| 1    | 2.579236 | -1.60329 | -2.52967 |
| 8    | -1.53378 | 1.143604 | 3.520875 |
| 1    | -1.90179 | 1.918542 | 3.098459 |
| 1    | -2.00352 | 0.400879 | 3.144647 |
| 8    | -3.93611 | 2.30574  | -0.59325 |
| 1    | -4.52684 | 2.93123  | -0.99061 |
| 1    | -4.28904 | 1.429437 | -0.79634 |
| 8    | -2.64161 | 3.316597 | 1.90084  |
| 1    | -1.90404 | 3.642212 | 1.392453 |
| 1    | -3.21525 | 2.909042 | 1.258035 |
| 8    | -3.30016 | -4.41729 | -1.12188 |
| 1    | -3.16462 | -3.46081 | -1.11314 |
| 1    | -4.21493 | -4.54762 | -0.91543 |
| 14   | -1.95316 | -1.79627 | 0.75543  |
| 8    | -1.65485 | -3.34254 | 1.244347 |
| 1    | -1.96494 | -4.00348 | 0.634664 |
| 8    | -2.77655 | -1.75723 | -0.58125 |
| 1    | -4.13296 | -0.79599 | -0.99125 |
| 8    | -2.68923 | -1.04661 | 2.056    |
| 1    | -3.43    | -1.5175  | 2.410905 |
| 8    | -4.82349 | -0.21373 | -1.36075 |
| 1    | -4.73391 | -0.31053 | -2.29991 |
| 8    | -1.50712 | -0.72347 | -2.84397 |
| 1    | -1.96183 | -1.10497 | -2.08291 |
| 1    | -1.39919 | 0.199696 | -2.63599 |

#### 4TS-16

| Atom | x        | y        | z        |
|------|----------|----------|----------|
| 14   | 0.794379 | -0.72521 | -0.92492 |
| 14   | -0.64275 | -0.43466 | 1.582752 |
| 8    | -1.82124 | -0.0832  | 0.580609 |
| 1    | -3.46725 | -0.34487 | 1.324663 |
| 8    | -0.10273 | 0.756534 | 2.577082 |
| 1    | 0.828152 | 0.740305 | 2.811555 |
| 8    | 0.561079 | -2.14565 | -1.70736 |
| 1    | -0.29113 | -2.55953 | -1.57203 |
| 8    | -1.07218 | -1.67396 | 2.604432 |
| 1    | -0.85989 | -1.51115 | 3.513056 |
| 8    | 2.326307 | -0.30975 | -1.21198 |
| 8    | 0.646777 | -0.95684 | 0.692136 |
| 8    | 0.190898 | 3.464623 | 1.613525 |
| 1    | 0.002177 | 2.730464 | 2.192679 |
| 8    | -4.33284 | -0.62793 | 1.649149 |
| 1    | -0.42146 | 3.305477 | 0.898067 |
| 8    | 2.71501  | 0.971495 | 3.14979  |
| 1    | 2.910436 | 1.816014 | 2.752547 |
| 1    | 3.209224 | 0.343046 | 2.629206 |
| 14   | 3.794507 | -0.26953 | -0.49987 |
| 8    | 3.567975 | -0.87436 | 1.023705 |
| 1    | 2.699368 | -1.23584 | 1.167176 |
| 8    | 4.842337 | -1.14912 | -1.36437 |
| 1    | 4.471442 | -1.92002 | -1.78916 |
| 8    | 4.395651 | 1.2288   | -0.40035 |
| 1    | 3.901668 | 1.887384 | 0.082382 |
| 8    | 2.93707  | 3.200848 | 1.247088 |
| 1    | 3.327942 | 4.064148 | 1.255415 |
| 1    | 1.980761 | 3.333819 | 1.243177 |
| 8    | 3.160966 | -3.37352 | -2.30442 |
| 1    | 3.133341 | -4.11906 | -1.7205  |
| 1    | 2.283139 | -2.9944  | -2.2822  |
| 8    | -3.19992 | -3.47322 | 1.977324 |
| 1    | -3.88961 | -2.81984 | 2.024005 |
| 1    | -2.4365  | -3.02081 | 2.329313 |
| 8    | -2.14366 | -2.76572 | -0.68962 |
| 1    | -2.13893 | -1.87359 | -0.34516 |
| 1    | -2.3733  | -3.30733 | 0.062238 |
| 8    | -3.10649 | 4.447911 | -2.01533 |
| 1    | -2.54229 | 3.797052 | -2.43789 |
| 1    | -3.98451 | 4.097974 | -2.08355 |
| 14   | -1.69756 | 1.151572 | -1.15647 |
| 8    | -1.52748 | 2.224185 | -2.48495 |
| 1    | -1.29149 | 1.789225 | -3.29132 |
| 8    | -1.88353 | 2.3813   | -0.05675 |
| 1    | -2.17125 | 3.181267 | -0.48694 |
| 8    | -0.23121 | 0.413135 | -1.37954 |
| 1    | -4.79713 | 0.163077 | 1.88701  |
| 8    | -3.00749 | 0.377996 | -1.74709 |
| 1    | -3.5491  | -0.24313 | -1.28036 |
| 8    | -5.00275 | -1.7232  | -0.97217 |
| 1    | -4.32837 | -2.37929 | -1.10868 |
| 1    | -4.98589 | -1.51364 | -0.0431  |

#### 4R-16

| Atom | x       | y       | z       |
|------|---------|---------|---------|
| 14   | 1.23153 | 0.12747 | 0.73248 |
| 14   | 3.83522 | -0.1808 | -0.8138 |
| 8    | 3.25225 | 0.86641 | -1.9272 |
| 1    | 2.31011 | 1.00743 | -1.8917 |
| 8    | 4.13949 | -1.6776 | -1.3512 |
| 1    | 3.4963  | -2.3648 | -1.1676 |
| 8    | 1.2146  | 1.22448 | 1.93393 |
| 1    | 0.37456 | 1.31862 | 2.38525 |
| 8    | 5.26244 | 0.46964 | -0.342  |
| 1    | 5.9497  | -0.1493 | -0.1407 |
| 8    | 0.42815 | -1.1946 | 1.19365 |
| 8    | 2.77022 | -0.2512 | 0.40887 |
| 8    | -0.5691 | -0.7774 | -2.9519 |
| 1    | -0.0041 | -0.3031 | -2.3486 |
| 8    | 0.6145  | 0.70598 | -0.6649 |
| 1    | -1.4242 | -0.3529 | -2.8581 |
| 8    | 2.08911 | -3.588  | -0.6456 |
| 1    | 1.25544 | -3.5374 | -1.1079 |
| 1    | 1.86115 | -3.5635 | 0.27736 |
| 14   | -0.7305 | -2.1539 | 1.76357 |
| 8    | 0.03708 | -3.5693 | 2.0841  |
| 1    | -0.4535 | -4.2459 | 2.52813 |
| 8    | -1.4232 | -1.5894 | 3.11089 |
| 1    | -1.617  | -0.6544 | 3.16679 |
| 8    | -1.895  | -2.3887 | 0.63786 |
| 1    | -1.599  | -2.7419 | -0.2001 |
| 8    | -0.6172 | -3.2733 | -1.8181 |
| 1    | -0.9599 | -3.9205 | -2.4197 |
| 1    | -0.6116 | -2.4285 | -2.2904 |
| 8    | -1.5319 | 1.26937 | 2.67894 |
| 1    | -1.7594 | 2.13066 | 3.00788 |
| 1    | -1.7513 | 1.29989 | 1.73095 |
| 8    | 4.16276 | 3.443   | -0.6492 |
| 1    | 3.87492 | 2.83329 | -1.3218 |
| 1    | 4.8147  | 2.95328 | -0.1623 |
| 8    | 1.73999 | 4.0556  | 1.10074 |
| 1    | 1.68537 | 3.1736  | 1.45641 |
| 1    | 2.48509 | 4.04234 | 0.50598 |
| 8    | -6.1027 | 0.09528 | -1.9903 |
| 1    | -5.7628 | -0.3973 | -1.2492 |
| 1    | -6.0493 | 1.00039 | -1.702  |
| 14   | -3.2237 | 0.93509 | -0.6616 |
| 8    | -4.0045 | -0.3312 | 0.06281 |
| 1    | -3.4468 | -1.062  | 0.31593 |
| 8    | -3.0092 | 0.49395 | -2.2578 |
| 1    | -3.8277 | 0.28073 | -2.6931 |
| 8    | -1.8645 | 1.36504 | -0.0039 |
| 1    | -0.3022 | 1.03818 | -0.5557 |
| 8    | -4.3871 | 2.12089 | -0.6615 |
| 1    | -4.0812 | 2.97468 | -0.3876 |
| 8    | -1.3299 | 4.03396 | 0.97729 |
| 1    | -0.403  | 4.24945 | 0.91833 |
| 1    | -1.4391 | 3.2062  | 0.51038 |

#### 4TS-17

| Atom | x       | y       | z       |
|------|---------|---------|---------|
| 14   | 0.62968 | -0.3275 | -0.5116 |
| 14   | 3.58786 | 0.25272 | 0.31751 |
| 8    | 3.45169 | -0.7582 | 1.609   |
| 1    | 2.54041 | -0.9873 | 1.77088 |
| 8    | 4.02549 | 1.76994 | 0.7082  |
| 1    | 3.34485 | 2.44052 | 0.77214 |
| 8    | 0.85231 | -1.4177 | -1.7319 |
| 1    | 0.05262 | -1.7939 | -2.068  |
| 8    | 4.85573 | -0.3608 | -0.5399 |
| 1    | 5.396   | 0.28809 | -0.9674 |
| 8    | -0.111  | 1.07575 | -0.8742 |
| 8    | 2.20622 | 0.23963 | -0.4857 |
| 8    | -0.4526 | 0.90512 | 3.22735 |
| 1    | 0.29862 | 0.55108 | 2.76148 |
| 8    | 0.65055 | -0.8174 | 1.08579 |
| 1    | -1.1726 | 0.3579  | 2.91705 |
| 8    | 1.92132 | 3.77304 | 0.7778  |
| 1    | 1.19925 | 3.73104 | 1.39706 |
| 1    | 1.49423 | 3.77889 | -0.0746 |
| 14   | -0.9613 | 2.32941 | -1.3715 |
| 8    | 0.0058  | 3.66012 | -1.4953 |
| 1    | 0.19697 | 3.93164 | -2.3826 |
| 8    | -1.6242 | 2.10606 | -2.8319 |
| 1    | -1.8869 | 1.21927 | -3.0815 |
| 8    | -2.1294 | 2.64243 | -0.2626 |
| 1    | -1.8217 | 2.99733 | 0.5701  |
| 8    | -0.7551 | 3.44832 | 2.18351 |
| 1    | -1.0549 | 4.06561 | 2.83701 |
| 1    | -0.6671 | 2.59407 | 2.62235 |
| 8    | -2.3949 | -0.6167 | -3.1166 |
| 1    | -3.3357 | -0.6991 | -3.0259 |
| 1    | -2.0368 | -0.8833 | -2.2677 |
| 8    | 4.52814 | -3.2399 | 0.35822 |
| 1    | 4.24902 | -2.6437 | 1.04757 |
| 1    | 4.90825 | -2.653  | -0.2864 |
| 8    | 1.92169 | -4.0669 | -0.875  |
| 1    | 1.76839 | -3.2044 | -1.2512 |
| 1    | 2.76761 | -4.0008 | -0.4377 |
| 8    | -5.3295 | -1.1927 | 2.22857 |
| 1    | -5.3251 | -0.4553 | 1.62784 |
| 1    | -5.1916 | -1.9479 | 1.66558 |
| 14   | -2.6726 | -1.0931 | 0.35123 |
| 8    | -3.7092 | 0.11823 | -0.0485 |
| 1    | -3.3483 | 1.00197 | -0.0792 |
| 8    | -2.2986 | -0.9454 | 1.96913 |
| 1    | -3.0614 | -1.0777 | 2.52481 |
| 8    | -1.3334 | -1.1656 | -0.4908 |
| 1    | -0.1059 | -1.3234 | 1.34822 |
| 8    | -3.6135 | -2.436  | 0.16913 |
| 1    | -3.1327 | -3.2501 | 0.0532  |
| 8    | -1.0577 | -4.0648 | -0.3323 |
| 1    | -0.1745 | -4.4228 | -0.3723 |
| 1    | -0.9517 | -3.1283 | -0.4742 |

#### 4R-17

| Atom | x       | y       | z       |
|------|---------|---------|---------|
| 14   | -0.506  | 0.48951 | -1.3439 |
| 14   | -1.6865 | 1.71247 | 1.19001 |
| 8    | -0.466  | 2.79742 | 1.15413 |
| 1    | 1.64121 | 3.18819 | 1.63063 |
| 8    | -1.5461 | 0.93689 | 2.61829 |
| 1    | -2.0466 | 0.13827 | 2.80725 |
| 8    | -0.9383 | 0.46658 | -2.9742 |
| 1    | -0.7583 | 1.28048 | -3.4197 |
| 8    | -3.1544 | 2.47886 | 1.14345 |
| 1    | -3.5156 | 2.74411 | 1.9776  |
| 8    | -0.7978 | -1.2023 | -1.3417 |
| 8    | -1.6436 | 0.75982 | -0.1041 |
| 8    | 1.08317 | -0.1591 | 3.3653  |
| 1    | 0.30944 | 0.37602 | 3.20074 |
| 8    | 2.5619  | 3.11831 | 1.40012 |
| 1    | 1.67435 | -0.0108 | 2.62963 |
| 8    | -2.7091 | -1.5868 | 3.17799 |
| 1    | -1.9469 | -2.0458 | 3.51915 |
| 1    | -2.8223 | -1.9453 | 2.29889 |
| 14   | -1.2701 | -2.5152 | -0.5867 |
| 8    | -2.5703 | -2.1078 | 0.36541 |
| 1    | -2.7931 | -1.1984 | 0.19257 |
| 8    | -1.6469 | -3.6741 | -1.6628 |
| 1    | -1.7693 | -3.3423 | -2.5508 |
| 8    | -0.1029 | -3.1322 | 0.39339 |
| 1    | -0.1662 | -3.0017 | 1.33608 |
| 8    | 0.00134 | -2.7082 | 3.30297 |
| 1    | 0.55359 | -3.3525 | 3.72426 |
| 1    | 0.45811 | -1.8605 | 3.36623 |
| 8    | -1.9664 | -2.0332 | -4.0811 |
| 1    | -2.8502 | -1.7187 | -4.2106 |
| 1    | -1.4935 | -1.2934 | -3.6936 |
| 8    | -2.6993 | 4.09255 | -1.331  |
| 1    | -2.2249 | 4.7767  | -0.8776 |
| 1    | -3.1081 | 3.57508 | -0.6425 |
| 8    | -0.1716 | 2.25174 | -1.4839 |
| 1    | -0.1103 | 2.82132 | 0.2588  |
| 1    | -0.9222 | 2.76834 | -1.7581 |
| 8    | 5.31676 | -1.4764 | 0.3684  |
| 1    | 4.68578 | -2.1546 | 0.14964 |
| 1    | 5.35566 | -0.9321 | -0.4113 |
| 14   | 2.44529 | -0.3317 | -0.4482 |
| 8    | 2.49315 | -1.9617 | -0.4871 |
| 1    | 1.69574 | -2.439  | -0.2609 |
| 8    | 2.87724 | 0.16371 | 1.0879  |
| 1    | 3.7369  | -0.1731 | 1.32809 |
| 8    | 1.03019 | 0.32801 | -0.7227 |
| 1    | 2.74911 | 2.18377 | 1.41739 |
| 8    | 3.59977 | 0.1728  | -1.4865 |
| 1    | 3.50983 | 1.09914 | -1.7179 |
| 8    | 2.68342 | 2.92489 | -1.6077 |
| 1    | 1.7496  | 2.73498 | -1.7037 |
| 1    | 2.77624 | 3.2113  | -0.7026 |

#### 4TS-18

| Atom | x       | y       | z       |
|------|---------|---------|---------|
| 14   | 0.07023 | -0.4854 | -1.31   |
| 14   | -2.0988 | -1.7996 | 0.32509 |
| 8    | -3.1084 | -0.5526 | 0.09211 |
| 1    | -3.5294 | 1.37541 | 0.89865 |
| 8    | -1.5642 | -1.8136 | 1.87257 |
| 1    | -0.7655 | -2.3142 | 2.06021 |
| 8    | 0.35205 | -0.3355 | -2.9238 |
| 1    | -0.3832 | 0.12431 | -3.3141 |
| 8    | -2.9034 | -3.213  | 0.05429 |
| 1    | -2.8106 | -3.8769 | 0.72247 |
| 8    | 1.57539 | -1.0764 | -0.92   |
| 8    | -0.8604 | -1.6845 | -0.7092 |
| 8    | -0.5374 | 0.49293 | 3.36038 |
| 1    | -1.0593 | -0.189  | 2.94083 |
| 8    | -3.4384 | 2.31773 | 1.00632 |
| 1    | -0.5582 | 1.24092 | 2.76674 |
| 8    | 0.88499 | -3.101  | 2.51415 |
| 1    | 1.30749 | -2.443  | 3.05942 |
| 1    | 1.48057 | -3.2095 | 1.77677 |
| 14   | 2.97975 | -1.2354 | -0.1979 |
| 8    | 3.03285 | -2.7026 | 0.57108 |
| 1    | 3.82725 | -3.2002 | 0.43695 |
| 8    | 4.20567 | -1.1749 | -1.2609 |
| 1    | 3.95289 | -1.0638 | -2.1781 |
| 8    | 3.20085 | -0.0734 | 0.94111 |
| 1    | 2.89304 | -0.2628 | 1.82653 |
| 8    | 2.00142 | -0.5682 | 3.55288 |
| 1    | 2.41993 | -0.2824 | 4.35359 |
| 1    | 1.13544 | -0.1393 | 3.52305 |
| 8    | 2.99097 | -0.9742 | -3.8721 |
| 1    | 2.84966 | -1.8328 | -4.2467 |
| 1    | 2.12302 | -0.6731 | -3.5958 |
| 8    | -5.6728 | -2.2445 | -0.7    |
| 1    | -5.3335 | -1.3843 | -0.4826 |
| 1    | -4.918  | -2.8106 | -0.5805 |
| 8    | -1.9718 | 0.35741 | -2.0821 |
| 1    | -2.8076 | -0.066  | -0.7133 |
| 1    | -2.4484 | -0.1779 | -2.7053 |
| 8    | 1.1318  | 5.217   | 1.2114  |
| 1    | 1.89241 | 4.65366 | 1.11193 |
| 1    | 0.77904 | 5.29294 | 0.33091 |
| 14   | 0.41725 | 2.35536 | 0.01863 |
| 8    | 2.01215 | 2.50548 | 0.32931 |
| 1    | 2.50988 | 1.71346 | 0.52757 |
| 8    | -0.4396 | 2.64715 | 1.41422 |
| 1    | -0.2437 | 3.51045 | 1.76995 |
| 8    | 0.00752 | 0.86599 | -0.4007 |
| 1    | -2.5309 | 2.45117 | 1.25975 |
| 8    | 0.07474 | 3.50424 | -1.0715 |
| 1    | -0.8226 | 3.48755 | -1.4263 |
| 8    | -2.5549 | 3.01916 | -1.8251 |
| 1    | -2.4042 | 2.08541 | -2.0379 |
| 1    | -3.067  | 3.00134 | -1.0217 |



#### 4R-19

| Atom | x        | y        | z        |
|------|----------|----------|----------|
| 14   | 3.098852 | -0.9264  | -0.70539 |
| 14   | 1.463608 | 1.553613 | -0.25145 |
| 8    | 0.418048 | 0.840546 | -1.2746  |
| 1    | -4.2909  | 3.982351 | -0.0983  |
| 8    | 1.924064 | 2.968371 | -0.88811 |
| 1    | 2.471595 | 3.530146 | -0.34101 |
| 8    | 0.818394 | 1.733023 | 1.232335 |
| 1    | -0.13542 | 1.64674  | 1.343081 |
| 8    | -3.89098 | 3.135528 | 0.041831 |
| 1    | -3.39704 | 2.918221 | -0.75564 |
| 8    | 1.834906 | -1.31158 | -1.65779 |
| 8    | 2.750322 | 0.550573 | -0.10192 |
| 8    | 3.369986 | -2.02982 | 0.438346 |
| 1    | 2.588495 | -2.45387 | 0.813785 |
| 8    | 4.494729 | -0.84908 | -1.5575  |
| 1    | 4.55609  | -0.17731 | -2.22195 |
| 8    | 6.362205 | -2.59275 | 0.161683 |
| 1    | 6.146673 | -2.05697 | -0.59239 |
| 1    | 5.518664 | -2.72116 | 0.581328 |
| 8    | 0.898715 | -2.98991 | 1.256863 |
| 1    | 0.52463  | -2.80861 | 2.118892 |
| 1    | 0.256391 | -2.69693 | 0.614385 |
| 14   | 0.322948 | -0.71732 | -1.78834 |
| 8    | -2.61481 | -0.77748 | 3.339094 |
| 1    | -2.36072 | 0.038006 | 2.913526 |
| 8    | -0.66475 | -1.58273 | -0.85187 |
| 1    | -3.23501 | -1.17835 | 2.732016 |
| 8    | -0.13257 | -0.72607 | -3.3507  |
| 1    | -1.00692 | -1.03949 | -3.53665 |
| 8    | 3.103682 | 2.071854 | 2.915853 |
| 1    | 2.205783 | 1.96057  | 2.605693 |
| 1    | 3.546838 | 1.272336 | 2.659595 |
| 8    | 3.762086 | 4.152794 | 1.024681 |
| 1    | 3.61204  | 3.561156 | 1.763705 |
| 1    | 4.656066 | 4.005103 | 0.747803 |
| 8    | -1.93194 | 1.386448 | 1.46329  |
| 1    | -2.48083 | 2.15604  | 1.346044 |
| 1    | -2.21847 | 0.778294 | 0.76304  |
| 8    | -2.48298 | 1.976314 | -2.06814 |
| 1    | -2.64454 | 1.132673 | -1.62297 |
| 1    | -1.53745 | 2.051484 | -2.11858 |
| 14   | -4.39688 | -0.73843 | -0.22743 |
| 8    | -5.4684  | 0.518389 | -0.15273 |
| 1    | -5.09008 | 1.378019 | 0.000887 |
| 8    | -4.43484 | -1.60348 | 1.195521 |
| 1    | -5.19818 | -2.152   | 1.30814  |
| 8    | -5.09177 | -1.77132 | -1.32065 |
| 1    | -5.62928 | -1.34504 | -1.97236 |
| 8    | -2.92689 | -0.24939 | -0.50656 |
| 1    | -1.54852 | -1.19892 | -0.66931 |
| 8    | -0.26185 | -2.28337 | 3.81617  |
| 1    | -1.09763 | -1.83272 | 3.66554  |
| 1    | 0.265351 | -1.68509 | 4.327447 |

#### 4TS-20

| Atom | x        | y        | z        |
|------|----------|----------|----------|
| 14   | 2.673752 | -1.13628 | -0.61222 |
| 14   | 1.170657 | 1.350428 | -0.17472 |
| 8    | -0.09994 | 0.449367 | -0.57793 |
| 1    | -4.50573 | 3.771214 | -0.81403 |
| 8    | 1.238873 | 2.563079 | -1.25342 |
| 1    | 1.972989 | 3.173684 | -1.19301 |
| 8    | 0.983685 | 1.923674 | 1.360341 |
| 1    | 0.097612 | 2.243822 | 1.525759 |
| 8    | -3.9372  | 3.070141 | -0.52737 |
| 1    | -3.33365 | 2.868314 | -1.25199 |
| 8    | 1.20629  | -1.67595 | -0.94665 |
| 8    | 2.519055 | 0.442717 | -0.15548 |
| 8    | 3.459999 | -1.95701 | 0.54351  |
| 1    | 2.911516 | -2.24259 | 1.281548 |
| 8    | 3.63236  | -1.20846 | -1.94668 |
| 1    | 3.174326 | -1.42991 | -2.7461  |
| 8    | 6.191533 | -2.36064 | -0.7304  |
| 1    | 5.661558 | -1.99264 | -1.42793 |
| 1    | 5.566395 | -2.46314 | -0.0207  |
| 8    | 1.421634 | -2.56663 | 2.367542 |
| 1    | 1.207954 | -1.83945 | 2.950976 |
| 1    | 0.687529 | -2.61377 | 1.758066 |
| 14   | -0.39999 | -1.16031 | -0.84764 |
| 8    | -2.36853 | 0.04241  | 3.400298 |
| 1    | -2.32665 | 0.808042 | 2.832624 |
| 8    | -0.79415 | -2.04561 | 0.48018  |
| 1    | -2.80952 | -0.61787 | 2.874566 |
| 8    | -0.84048 | -1.60948 | -2.35714 |
| 1    | -1.75561 | -1.441   | -2.52846 |
| 8    | 3.864022 | 2.553933 | 1.717584 |
| 1    | 2.952023 | 2.544492 | 1.992937 |
| 1    | 4.024357 | 1.665889 | 1.417351 |
| 8    | 3.69172  | 4.003184 | -0.76838 |
| 1    | 3.859638 | 3.649067 | 0.106228 |
| 1    | 4.355806 | 3.629803 | -1.33237 |
| 8    | -1.90389 | 1.942633 | 1.243944 |
| 1    | -2.5725  | 2.536468 | 0.915758 |
| 1    | -1.82836 | 1.254455 | 0.581004 |
| 8    | -2.11466 | 2.005052 | -2.30131 |
| 1    | -2.1678  | 1.138541 | -1.88672 |
| 1    | -1.19746 | 2.249306 | -2.24206 |
| 14   | -3.8798  | -0.88687 | -0.31584 |
| 8    | -5.00776 | 0.302593 | -0.23975 |
| 1    | -4.71377 | 1.208536 | -0.24913 |
| 8    | -3.67354 | -1.62066 | 1.173567 |
| 1    | -4.30355 | -2.29751 | 1.380233 |
| 8    | -4.60114 | -2.06417 | -1.22508 |
| 1    | -5.31171 | -1.76507 | -1.77388 |
| 8    | -2.45791 | -0.39017 | -0.7762  |
| 1    | -1.68075 | -1.96727 | 0.809284 |
| 8    | 0.557503 | -0.14314 | 3.713931 |
| 1    | -0.39857 | -0.17234 | 3.723955 |
| 1    | 0.789317 | 0.508327 | 3.061079 |

**4R-21**

| Atom | x        | y        | z        |
|------|----------|----------|----------|
| 14   | 1.999197 | -0.72872 | -1.6418  |
| 14   | 1.925817 | 1.435122 | 0.41959  |
| 8    | 0.747475 | 2.028139 | -0.53153 |
| 1    | -1.38516 | 4.471486 | 2.80974  |
| 8    | 3.124873 | 2.514707 | 0.558775 |
| 1    | 3.863477 | 2.20803  | 1.078948 |
| 8    | 1.31001  | 1.068447 | 1.887749 |
| 1    | 0.354081 | 1.124753 | 1.983077 |
| 8    | -1.90559 | 4.022724 | 2.157522 |
| 1    | -1.54945 | 4.289998 | 1.308818 |
| 8    | 0.63086  | -0.01558 | -2.12901 |
| 8    | 2.47502  | 0.066357 | -0.29532 |
| 8    | 1.891479 | -2.31324 | -1.3322  |
| 1    | 1.606772 | -2.59111 | -0.46116 |
| 8    | 3.10789  | -0.62023 | -2.84526 |
| 1    | 2.983862 | 0.091094 | -3.45817 |
| 8    | 3.880756 | -3.55458 | -3.30961 |
| 1    | 3.963389 | -2.61732 | -3.4405  |
| 1    | 3.194989 | -3.61731 | -2.65434 |
| 8    | 1.085934 | -2.88056 | 1.34422  |
| 1    | 1.103865 | -3.68069 | 1.855951 |
| 1    | 0.266468 | -2.44667 | 1.594429 |
| 14   | -0.31096 | 1.20349  | -1.52728 |
| 8    | -1.35228 | -1.74119 | 2.310103 |
| 1    | -1.40955 | -0.79271 | 2.413549 |
| 8    | -1.59808 | 0.705499 | -0.79425 |
| 1    | -2.00402 | -1.94379 | 1.639452 |
| 8    | -0.60117 | 2.283679 | -2.74176 |
| 1    | -1.44651 | 2.182805 | -3.15662 |
| 8    | 2.600389 | -1.11307 | 3.198023 |
| 1    | 2.107485 | -0.32224 | 2.986675 |
| 1    | 2.351084 | -1.7235  | 2.508697 |
| 8    | 4.780728 | 0.418962 | 1.849107 |
| 1    | 4.26716  | -0.10295 | 2.462873 |
| 1    | 4.762881 | -0.07312 | 1.037456 |
| 8    | -1.48846 | 1.142879 | 1.926279 |
| 1    | -1.75725 | 2.035473 | 2.139173 |
| 1    | -1.62046 | 1.042975 | 0.972433 |
| 8    | -0.55336 | 4.646933 | -0.31316 |
| 1    | -1.00228 | 4.619265 | -1.14865 |
| 1    | 0.069596 | 3.92451  | -0.35729 |
| 14   | -4.40824 | -1.14198 | -0.49946 |
| 8    | -5.3984  | -1.17158 | 0.800849 |
| 1    | -5.43218 | -0.37402 | 1.309627 |
| 8    | -2.87846 | -1.61459 | -0.14403 |
| 1    | -2.22685 | -0.9467  | -0.40028 |
| 8    | -5.06734 | -2.23067 | -1.52587 |
| 1    | -4.45547 | -2.69264 | -2.08061 |
| 8    | -4.33382 | 0.371327 | -1.09442 |
| 1    | -3.44247 | 0.735184 | -1.09953 |
| 8    | 0.434677 | -3.07011 | 4.43276  |
| 1    | -0.31865 | -2.68411 | 3.997373 |
| 1    | 1.128661 | -2.42163 | 4.372323 |

**4TS-22**

| Atom | x       | y       | z       |
|------|---------|---------|---------|
| 14   | 1.80195 | -1.1249 | -1.1017 |
| 14   | 1.64813 | 1.81574 | -0.7149 |
| 8    | 0.19929 | 1.62861 | -1.4206 |
| 1    | -2.289  | 4.78546 | 0.56807 |
| 8    | 2.53768 | 2.93303 | -1.4729 |
| 1    | 3.44153 | 2.98042 | -1.168  |
| 8    | 1.4443  | 2.21629 | 0.85846 |
| 1    | 0.56008 | 2.16427 | 1.22622 |
| 8    | -2.8201 | 4.16212 | 1.04527 |
| 1    | -3.3153 | 3.67597 | 0.38301 |
| 8    | 0.18327 | -0.9519 | -1.0939 |
| 8    | 2.4058  | 0.35932 | -0.8034 |
| 8    | 2.34779 | -2.1976 | -0.0221 |
| 1    | 2.37519 | -1.9425 | 0.90123 |
| 8    | 2.28829 | -1.7049 | -2.554  |
| 1    | 1.72586 | -1.5132 | -3.2927 |
| 8    | 3.92363 | -4.1862 | -1.7795 |
| 1    | 3.58016 | -3.5391 | -2.3843 |
| 1    | 3.56541 | -3.9094 | -0.9439 |
| 8    | 2.15152 | -1.2008 | 2.64257 |
| 1    | 2.20381 | -1.734  | 3.43043 |
| 1    | 1.24053 | -0.9058 | 2.63958 |
| 14   | -0.8058 | 0.32918 | -1.5045 |
| 8    | -0.7061 | -0.7336 | 2.98548 |
| 1    | -0.9435 | 0.17848 | 2.82561 |
| 8    | -2.0119 | 0.39487 | -0.483  |
| 1    | -1.2086 | -1.2441 | 2.3485  |
| 8    | -1.2522 | 0.15713 | -3.0657 |
| 1    | -2.0737 | -0.3201 | -3.1279 |
| 8    | 3.69648 | 1.43323 | 2.50031 |
| 1    | 2.92178 | 1.86144 | 2.14395 |
| 1    | 3.42568 | 0.52633 | 2.61208 |
| 8    | 4.96653 | 2.00681 | -0.0773 |
| 1    | 4.74883 | 1.86693 | 0.84417 |
| 1    | 4.83452 | 1.15957 | -0.4848 |
| 8    | -1.2335 | 1.83466 | 1.752   |
| 1    | -1.708  | 2.6653  | 1.74043 |
| 1    | -1.5119 | 1.3657  | 0.95503 |
| 8    | -3.9508 | 2.40387 | -0.8825 |
| 1    | -3.2796 | 1.71437 | -0.9086 |
| 1    | -4.7771 | 1.94618 | -0.7984 |
| 14   | -3.3126 | -1.3632 | -0.0238 |
| 8    | -4.107  | -0.24   | 0.88727 |
| 1    | -3.6311 | 0.56262 | 1.03508 |
| 8    | -1.9523 | -1.996  | 0.67164 |
| 1    | -1.1468 | -1.8319 | 0.19338 |
| 8    | -4.4247 | -2.6054 | 0.18923 |
| 1    | -4.8747 | -2.6033 | 1.02052 |
| 8    | -3.3667 | -1.3944 | -1.6872 |
| 1    | -3.9519 | -2.089  | -1.9628 |
| 8    | 0.75086 | -2.0508 | 5.13081 |
| 1    | 0.07274 | -1.672  | 4.57388 |
| 1    | 0.81092 | -1.4912 | 5.89253 |

**4R-22**

| Atom | x       | y       | z       |
|------|---------|---------|---------|
| 14   | 1.85193 | -0.9844 | -1.2185 |
| 14   | 1.51893 | 1.89635 | -0.5319 |
| 8    | 0.05903 | 1.6915  | -1.2155 |
| 1    | -2.391  | 4.61824 | 0.74851 |
| 8    | 2.3166  | 3.12811 | -1.209  |
| 1    | 3.22157 | 3.21068 | -0.9145 |
| 8    | 1.33317 | 2.13949 | 1.0746  |
| 1    | 0.45378 | 2.04133 | 1.44353 |
| 8    | -2.9046 | 3.97749 | 1.22193 |
| 1    | -3.4276 | 3.51576 | 0.56371 |
| 8    | 0.22608 | -0.9055 | -1.2722 |
| 8    | 2.35015 | 0.50091 | -0.7714 |
| 8    | 2.41758 | -2.1103 | -0.2072 |
| 1    | 2.43361 | -1.9198 | 0.73238 |
| 8    | 2.42714 | -1.4098 | -2.6907 |
| 1    | 1.87449 | -1.2131 | -3.435  |
| 8    | 4.22094 | -3.8211 | -2.0473 |
| 1    | 3.85064 | -3.1507 | -2.6093 |
| 1    | 3.80435 | -3.6536 | -1.2098 |
| 8    | 2.20851 | -1.3378 | 2.52315 |
| 1    | 2.28219 | -1.9493 | 3.25029 |
| 1    | 1.28967 | -1.0703 | 2.55724 |
| 14   | -0.8401 | 0.34645 | -1.4889 |
| 8    | -0.6635 | -1.0245 | 2.92048 |
| 1    | -0.9587 | -0.1181 | 2.87347 |
| 8    | -2.0262 | 0.21516 | -0.4279 |
| 1    | -1.1514 | -1.4906 | 2.23617 |
| 8    | -1.3471 | 0.3797  | -3.0333 |
| 1    | -2.1454 | -0.1337 | -3.1296 |
| 8    | 3.66518 | 1.35192 | 2.59442 |
| 1    | 2.8573  | 1.7657  | 2.30081 |
| 1    | 3.44457 | 0.42563 | 2.63404 |
| 8    | 4.82493 | 2.25947 | 0.06491 |
| 1    | 4.63874 | 2.00975 | 0.97007 |
| 1    | 4.78133 | 1.44591 | -0.4221 |
| 8    | -1.3453 | 1.64278 | 1.8939  |
| 1    | -1.8166 | 2.47599 | 1.88015 |
| 1    | -1.5697 | 1.20535 | 1.06753 |
| 8    | -4.1501 | 2.25397 | -0.6747 |
| 1    | -3.4489 | 1.61657 | -0.8062 |
| 1    | -4.8876 | 1.7301  | -0.386  |
| 14   | -3.1647 | -1.3194 | -0.1254 |
| 8    | -4.0064 | -0.3659 | 0.96361 |
| 1    | -3.5447 | 0.39199 | 1.28565 |
| 8    | -1.8632 | -2.133  | 0.55177 |
| 1    | -1.0451 | -2.0067 | 0.08753 |
| 8    | -4.316  | -2.5749 | -0.0227 |
| 1    | -4.6835 | -2.6951 | 0.83937 |
| 8    | -3.3029 | -1.3165 | -1.8046 |
| 1    | -3.9023 | -2.0057 | -2.0607 |
| 8    | 0.86188 | -2.5354 | 4.87991 |
| 1    | 0.16128 | -2.1176 | 4.38166 |
| 1    | 0.86764 | -2.1203 | 5.73114 |

**4TS-23**

| Atom | x       | y       | z       |
|------|---------|---------|---------|
| 14   | 2.28451 | 1.44378 | -0.8876 |
| 14   | 3.16856 | -1.1839 | 0.24616 |
| 8    | 1.66088 | -1.1997 | 0.85896 |
| 8    | 4.26285 | -1.3599 | 1.42522 |
| 1    | 4.86837 | -2.0946 | 1.36002 |
| 8    | 3.33633 | -2.4149 | -0.8179 |
| 1    | 2.52301 | -2.7581 | -1.1926 |
| 8    | 0.82215 | 0.87154 | -0.4528 |
| 8    | 3.34112 | 0.26394 | -0.4816 |
| 8    | 2.39885 | 1.67581 | -2.5032 |
| 1    | 2.6576  | 0.929   | -3.025  |
| 8    | 2.55117 | 2.86563 | -0.1803 |
| 1    | 1.86387 | 3.18184 | 0.41781 |
| 8    | 3.70751 | 4.48877 | -2.5667 |
| 1    | 3.54448 | 4.41461 | -1.6334 |
| 1    | 3.2819  | 3.71902 | -2.9249 |
| 14   | 0.3435  | -0.2855 | 0.59322 |
| 8    | -0.8283 | -1.1462 | -0.1087 |
| 8    | -0.1465 | 0.34525 | 2.00923 |
| 1    | -1.0879 | 0.27822 | 2.16983 |
| 8    | 5.71027 | -3.6136 | 0.27943 |
| 1    | 4.97671 | -3.5241 | -0.3248 |
| 1    | 6.49176 | -3.3932 | -0.2088 |
| 8    | 0.66948 | -3.0518 | -1.7369 |
| 1    | 0.216   | -3.7758 | -2.1469 |
| 1    | 0.01518 | -2.5837 | -1.2194 |
| 14   | -2.4467 | -0.7487 | -0.2552 |
| 8    | -3.0646 | -2.0696 | -0.9332 |
| 1    | -4.0013 | -2.2018 | -1.0852 |
| 8    | -2.4124 | 0.58436 | -1.2339 |
| 1    | -1.6593 | 0.63492 | -1.808  |
| 8    | -4.9878 | 0.31498 | -0.0109 |
| 1    | -4.8989 | 0.7509  | -0.8483 |
| 8    | -2.8299 | -0.3661 | 1.27879 |
| 1    | -3.7206 | 3.2E-05 | 1.2502  |
| 8    | -2.2834 | 3.19172 | 0.32578 |
| 1    | -2.3524 | 2.4288  | -0.2407 |
| 1    | -3.1064 | 3.20096 | 0.81298 |
| 8    | -7.1872 | -1.1192 | 0.07912 |
| 1    | -6.4    | -0.5217 | 0.06559 |
| 1    | -7.3289 | -1.3503 | 0.9863  |
| 8    | 2.53744 | -0.453  | 4.04107 |
| 1    | 1.70306 | -0.3331 | 3.60372 |
| 1    | 3.13108 | -0.7823 | 3.37615 |
| 8    | 0.3663  | 3.43057 | 1.52307 |
| 1    | 0.2835  | 2.6492  | 2.05818 |
| 1    | -0.4819 | 3.50256 | 1.08164 |
| 8    | -5.742  | -2.8083 | -1.6226 |
| 1    | -5.9384 | -2.4468 | -2.4758 |
| 1    | -6.3162 | -2.3414 | -1.0081 |
| 8    | -4.9315 | 2.61648 | 1.4449  |
| 1    | -5.0323 | 1.78333 | 0.94647 |
| 1    | -5.7368 | 3.09951 | 1.32646 |

**4R-23**

| Atom | x       | y       | z       |
|------|---------|---------|---------|
| 14   | 2.83357 | -0.9557 | 0.23549 |
| 14   | 1.24121 | 0.52987 | -1.8126 |
| 8    | 0.23499 | -0.7394 | -1.6722 |
| 1    | -4.9992 | 2.72815 | 0.31712 |
| 8    | 1.67761 | 0.72931 | -3.3558 |
| 1    | 2.3463  | 1.39905 | -3.4872 |
| 8    | 0.55098 | 1.86242 | -1.1762 |
| 1    | -0.4031 | 1.90245 | -1.0685 |
| 8    | -4.8021 | 3.10838 | -0.5358 |
| 1    | -5.1301 | 2.46385 | -1.1585 |
| 8    | 1.44267 | -1.7951 | 0.37138 |
| 8    | 2.56127 | 0.17709 | -0.9005 |
| 8    | 3.33093 | -0.2693 | 1.61155 |
| 1    | 2.96954 | 0.59206 | 1.83193 |
| 8    | 4.03217 | -1.9887 | -0.1807 |
| 1    | 3.77453 | -2.7785 | -0.6359 |
| 8    | 6.05117 | -1.578  | 2.13092 |
| 1    | 5.78914 | -1.9486 | 1.29672 |
| 1    | 5.31759 | -1.0168 | 2.35575 |
| 8    | 1.98249 | 2.16863 | 2.11751 |
| 1    | 1.83083 | 2.30544 | 3.04915 |
| 1    | 1.12206 | 1.912   | 1.79004 |
| 14   | 0.06585 | -1.8655 | -0.4997 |
| 8    | -0.7892 | 1.11957 | 1.98543 |
| 1    | -1.2877 | 1.57654 | 1.30608 |
| 8    | -1.1952 | -1.4872 | 0.43986 |
| 1    | -0.8508 | 0.19833 | 1.74673 |
| 8    | -0.0901 | -3.3506 | -1.1302 |
| 1    | -0.9923 | -3.6208 | -1.2743 |
| 8    | 2.49046 | 3.87001 | -0.4015 |
| 1    | 1.69531 | 3.42047 | -0.6775 |
| 1    | 2.63803 | 3.55042 | 0.48303 |
| 8    | 3.86147 | 2.54038 | -2.6031 |
| 1    | 3.54026 | 3.13716 | -1.9269 |
| 1    | 4.28324 | 1.83785 | -2.1244 |
| 8    | -2.1495 | 1.91732 | -0.3953 |
| 1    | -2.8292 | 2.57753 | -0.5264 |
| 1    | -2.6317 | 1.07938 | -0.3727 |
| 8    | -5.5876 | 0.5014  | -1.7464 |
| 1    | -6.397  | 0.26261 | -1.3158 |
| 1    | -4.8842 | 0.12749 | -1.2013 |
| 14   | -2.8351 | -1.7054 | 0.30013 |
| 8    | -3.6341 | -0.3926 | 0.00402 |
| 1    | -4.5022 | 0.62827 | 1.21816 |
| 8    | -3.2363 | -2.4436 | 1.71693 |
| 1    | -4.1131 | -2.2679 | 2.02644 |
| 8    | -4.9677 | 1.25207 | 1.79046 |
| 1    | -4.3614 | 1.46917 | 2.48553 |
| 8    | -2.9582 | -2.8265 | -0.9307 |
| 1    | -3.4941 | -2.54   | -1.6575 |
| 8    | 0.33008 | 1.89868 | 4.54479 |
| 1    | -0.2474 | 1.63287 | 3.83099 |
| 1    | 0.45017 | 1.13215 | 5.08852 |

**4R-24**

| Atom | x       | y       | z       |
|------|---------|---------|---------|
| 14   | 2.4683  | -0.9922 | -0.5139 |
| 14   | -1.7292 | 0.22264 | -0.3814 |
| 8    | -1.0788 | -0.7684 | 0.74594 |
| 1    | -0.1099 | -0.743  | 0.8227  |
| 8    | -1.1307 | -0.0603 | -1.8617 |
| 1    | -0.1956 | -0.2256 | -1.9699 |
| 8    | -1.5577 | 1.79466 | 0.05908 |
| 1    | -0.6752 | 2.10241 | 0.26725 |
| 8    | -3.3202 | -0.0502 | -0.4381 |
| 8    | 3.97942 | -0.4241 | -0.6297 |
| 8    | 1.60658 | -0.4574 | 0.68284 |
| 8    | 1.69393 | -0.6493 | -1.9465 |
| 1    | 2.22381 | -0.6814 | -2.7311 |
| 8    | 2.72825 | -2.6429 | -0.4748 |
| 1    | 1.95481 | -3.1751 | -0.3487 |
| 8    | -5.2166 | 2.75281 | -1.8425 |
| 1    | -5.6012 | 1.90121 | -1.6445 |
| 1    | -4.4527 | 2.56768 | -2.3734 |
| 8    | -2.9231 | -2.1084 | 2.4777  |
| 1    | -2.1914 | -1.76   | 1.96556 |
| 1    | -3.2086 | -1.3915 | 3.03061 |
| 8    | 1.18002 | 2.25241 | 0.85616 |
| 1    | 1.21369 | 2.44847 | 1.78394 |
| 1    | 1.39317 | 1.30958 | 0.78429 |
| 14   | 5.32915 | 0.40467 | -0.2677 |
| 8    | 6.56718 | -0.6457 | -0.3017 |
| 1    | 6.34305 | -1.5619 | -0.4484 |
| 8    | 5.61446 | 1.58657 | -1.3451 |
| 1    | 5.09691 | 2.37812 | -1.2227 |
| 8    | 5.14149 | 1.13194 | 1.18893 |
| 1    | 4.61989 | 0.69624 | 1.86119 |
| 8    | 5.53325 | -3.3924 | -0.446  |
| 1    | 4.59884 | -3.2037 | -0.5318 |
| 1    | 5.64381 | -3.7659 | 0.41742 |
| 8    | 3.81473 | 3.50728 | 0.04096 |
| 1    | 4.26092 | 3.01927 | 0.72675 |
| 1    | 2.90146 | 3.24093 | 0.10783 |
| 8    | 3.13448 | -0.021  | 2.91161 |
| 1    | 3.12062 | -0.7447 | 3.5217  |
| 1    | 2.52519 | -0.2452 | 2.19327 |
| 14   | -4.7609 | -0.3343 | 0.23393 |
| 8    | -4.8969 | 0.48666 | 1.62752 |
| 1    | -4.6859 | 1.42216 | 1.58517 |
| 8    | -5.8918 | 0.09058 | -0.8743 |
| 1    | -6.5897 | -0.5392 | -1.0378 |
| 8    | -4.9964 | -1.9239 | 0.54654 |
| 1    | -4.4021 | -2.2757 | 1.21136 |
| 8    | -4.0401 | 3.08995 | 0.87763 |
| 1    | -4.4806 | 3.229   | 0.04259 |
| 1    | -3.1459 | 2.8397  | 0.65294 |
| 8    | -7.2952 | -2.4837 | -1.035  |
| 1    | -6.6008 | -2.6298 | -0.3946 |
| 1    | -7.0297 | -2.9441 | -1.8195 |

**4TS-25**

| Atom | x       | y       | z       |
|------|---------|---------|---------|
| 14   | 1.88454 | -0.4787 | -0.8926 |
| 14   | -1.2491 | 0.05215 | -0.1603 |
| 8    | -1.1076 | -1.0759 | 1.05595 |
| 1    | -0.2033 | -1.2001 | 1.30457 |
| 8    | -0.9665 | -0.4784 | -1.7131 |
| 1    | -0.4674 | 0.10724 | -2.2673 |
| 8    | -1.1839 | 1.7009  | 0.10281 |
| 1    | -0.2941 | 2.02345 | 0.11366 |
| 8    | -2.9176 | 0.00411 | -0.193  |
| 8    | 3.35316 | -0.5707 | -0.2478 |
| 8    | 0.80162 | 0.17795 | 0.06459 |
| 8    | 1.9695  | 0.47165 | -2.2543 |
| 1    | 2.59526 | 0.20467 | -2.9144 |
| 8    | 1.52032 | -2.0309 | -1.3359 |
| 1    | 0.61945 | -2.1236 | -1.6299 |
| 8    | -3.7834 | 3.22657 | -1.0197 |
| 1    | -4.4148 | 2.52717 | -1.1666 |
| 1    | -2.9357 | 2.79467 | -1.0147 |
| 8    | -3.3365 | -2.4453 | 2.30403 |
| 1    | -2.5255 | -2.0949 | 1.93632 |
| 1    | -3.7388 | -1.7095 | 2.7522  |
| 8    | 3.01072 | 3.05333 | -0.7762 |
| 1    | 2.71942 | 2.82255 | 0.10121 |
| 1    | 2.63024 | 2.40303 | -1.3583 |
| 14   | 4.82223 | -0.5937 | 0.44744 |
| 8    | 5.06153 | -2.0642 | 1.08577 |
| 1    | 4.57482 | -2.7915 | 0.70275 |
| 8    | 5.98326 | -0.2661 | -0.6409 |
| 1    | 6.13195 | 0.66029 | -0.8182 |
| 8    | 4.85661 | 0.57717 | 1.59206 |
| 1    | 4.01248 | 0.91733 | 1.87709 |
| 8    | 3.27663 | -4.0163 | -0.1527 |
| 1    | 2.68435 | -3.4379 | -0.6324 |
| 1    | 2.7389  | -4.4852 | 0.47055 |
| 8    | 5.90527 | 2.63946 | -0.4294 |
| 1    | 5.83819 | 2.39642 | 0.48759 |
| 1    | 5.02004 | 2.90253 | -0.676  |
| 8    | 2.16255 | 1.76391 | 1.85442 |
| 1    | 1.66935 | 2.04421 | 2.6138  |
| 1    | 1.60881 | 1.14645 | 1.35913 |
| 14   | -4.4456 | -0.1755 | 0.20199 |
| 8    | -4.6955 | 0.27282 | 1.75671 |
| 1    | -4.3173 | 1.11661 | 2.00469 |
| 8    | -5.3437 | 0.71018 | -0.8514 |
| 1    | -6.1692 | 0.33012 | -1.1363 |
| 8    | -4.9982 | -1.7191 | 0.06778 |
| 1    | -4.601  | -2.3129 | 0.70296 |
| 8    | -3.2881 | 2.80216 | 1.87864 |
| 1    | -3.7014 | 3.26499 | 1.15483 |
| 1    | -2.4843 | 2.46578 | 1.49018 |
| 8    | -7.2329 | -1.4468 | -1.6749 |
| 1    | -6.6128 | -1.8354 | -1.0595 |
| 1    | -6.9243 | -1.6876 | -2.5378 |

**4TS-26**

| Atom | x         | y         | z         |
|------|-----------|-----------|-----------|
| 14   | 0.992855  | -1.886186 | 0.067277  |
| 14   | -1.782907 | -1.376872 | -0.794087 |
| 8    | -2.999572 | -2.307112 | -0.256181 |
| 1    | -2.899416 | -2.65678  | 0.629861  |
| 8    | -2.206194 | -0.924585 | -2.286595 |
| 1    | -1.75562  | -0.16757  | -2.672447 |
| 8    | 0.491354  | -1.081757 | 1.402309  |
| 1    | -1.459877 | -2.766676 | 2.604056  |
| 8    | -1.548914 | -0.066932 | 0.173648  |
| 8    | 1.90844   | -0.846167 | -0.789317 |
| 8    | -0.365427 | -2.203545 | -0.765494 |
| 8    | 1.818453  | -3.22975  | 0.392346  |
| 1    | 2.768437  | -3.135167 | 0.46081   |
| 8    | -2.399789 | -2.84622  | 2.494471  |
| 1    | -2.779283 | -2.06901  | 2.904387  |
| 8    | 4.606273  | -2.377976 | 0.287691  |
| 1    | 4.96914   | -1.82859  | 0.978997  |
| 1    | 4.497139  | -1.777928 | -0.44128  |
| 8    | 2.570796  | 0.634847  | -0.883862 |
| 1    | 3.987792  | 0.256289  | -1.718604 |
| 1    | 3.865851  | -0.376482 | -2.412558 |
| 8    | 1.847503  | 1.672014  | -1.955144 |
| 1    | 2.410862  | 1.844651  | -2.697772 |
| 1    | 3.292085  | 1.277519  | 0.445459  |
| 14   | 2.610462  | 1.596299  | 1.029065  |
| 8    | 5.584088  | 0.035685  | 1.64149   |
| 1    | 4.826249  | 0.51474   | 1.303827  |
| 8    | 6.317251  | 0.319221  | 1.112506  |
| 1    | -3.350252 | -0.253316 | 3.396715  |
| 8    | -2.532391 | 0.203746  | 3.203725  |
| 1    | -3.97503  | 0.069944  | 2.759504  |
| 8    | -3.458107 | 2.220897  | 0.582843  |
| 1    | -2.92999  | 2.692306  | 1.218984  |
| 1    | -2.985408 | 1.412877  | 0.400315  |
| 8    | -0.867912 | 1.402955  | -3.138196 |
| 1    | -0.036497 | 1.47828   | -2.676916 |
| 1    | -1.408631 | 2.124298  | -2.817648 |
| 8    | -4.776756 | -2.541571 | -2.729146 |
| 1    | -4.527663 | -2.725341 | -1.830172 |
| 1    | -4.097485 | -1.9422   | -3.017696 |
| 14   | -0.250235 | 0.365989  | 1.115514  |
| 8    | 0.743077  | 1.355515  | 0.397336  |
| 1    | 0.416902  | 2.976587  | -0.033854 |
| 8    | 0.177127  | 3.916998  | -0.141302 |
| 1    | 0.871682  | 4.307122  | -0.654264 |
| 8    | -0.876118 | 0.926178  | 2.5307    |
| 1    | -0.845229 | 1.871479  | 2.649968  |
| 8    | -1.351803 | 3.786038  | 2.216931  |
| 1    | -0.796069 | 4.055056  | 1.482745  |
| 1    | -1.496849 | 4.550019  | 2.758054  |
| 8    | -2.26486  | 3.589738  | -1.790639 |
| 1    | -1.502446 | 3.819112  | -1.265729 |
| 1    | -2.877136 | 3.193971  | -1.174834 |

**4R-26**

| Atom | x       | y       | z       |
|------|---------|---------|---------|
| 14   | -0.9167 | -2.0024 | -0.2156 |
| 14   | 1.77361 | -1.3976 | 0.78787 |
| 8    | 3.11793 | -2.1544 | 0.28911 |
| 1    | 3.11875 | -2.4672 | -0.6161 |
| 8    | 2.03972 | -0.9908 | 2.32671 |
| 1    | 1.54068 | -0.2603 | 2.70476 |
| 8    | -0.4001 | -1.1452 | -1.5323 |
| 1    | 1.8778  | -2.6508 | -2.7162 |
| 8    | 1.47782 | -0.045  | -0.1204 |
| 8    | -1.7837 | -0.9422 | 0.64374 |
| 8    | 0.45818 | -2.3517 | 0.58619 |
| 8    | -1.7509 | -3.325  | -0.5905 |
| 1    | -2.7035 | -3.2232 | -0.578  |
| 8    | 2.80451 | -2.5988 | -2.5172 |
| 1    | 3.10617 | -1.76   | -2.8656 |
| 8    | -4.473  | -2.3792 | -0.2125 |
| 1    | -5.1151 | -2.0021 | -0.8045 |
| 1    | -4.2272 | -1.6425 | 0.3425  |
| 14   | -2.3793 | 0.61759 | 0.55038 |
| 8    | -3.8299 | 0.1593  | 1.41185 |
| 1    | -3.6391 | -0.407  | 2.14684 |
| 8    | -1.9014 | 1.70979 | 1.7444  |
| 1    | -2.5829 | 1.79441 | 2.3967  |
| 8    | -3.3375 | 1.10623 | -0.7315 |
| 1    | -2.825  | 1.47865 | -1.4331 |
| 8    | -6.0531 | 0.14897 | -0.8312 |
| 1    | -5.1876 | 0.54041 | -0.9444 |
| 1    | -6.1696 | 0.16691 | 0.11022 |
| 8    | 3.47187 | 0.13683 | -3.2522 |
| 1    | 2.59943 | 0.49868 | -3.112  |
| 1    | 4.01276 | 0.52067 | -2.5721 |
| 8    | 3.40898 | 2.23523 | -0.4814 |
| 1    | 2.87395 | 2.75512 | -1.072  |
| 1    | 2.91215 | 1.44014 | -0.3069 |
| 8    | 0.65148 | 1.29289 | 3.19409 |
| 1    | -0.1675 | 1.41742 | 2.71924 |
| 1    | 1.21852 | 2.01645 | 2.93243 |
| 8    | 4.75649 | -2.3387 | 2.86526 |
| 1    | 4.58462 | -2.4883 | 1.94229 |
| 1    | 3.99444 | -1.8446 | 3.14586 |
| 14   | 0.22054 | 0.31285 | -1.127  |
| 8    | -0.8994 | 1.19024 | -0.3919 |
| 1    | -0.5779 | 2.93245 | 0.18271 |
| 8    | -0.3124 | 3.85469 | 0.27824 |
| 1    | -0.9483 | 4.23121 | 0.87231 |
| 8    | 0.82737 | 1.05667 | -2.4506 |
| 1    | 0.7968  | 2.01002 | -2.4781 |
| 8    | 1.26682 | 3.86285 | -2.0257 |
| 1    | 0.69365 | 4.11835 | -1.3006 |
| 1    | 1.34367 | 4.6069  | -2.6075 |
| 8    | 2.14615 | 3.50668 | 1.95023 |
| 1    | 1.40786 | 3.73613 | 1.39373 |
| 1    | 2.80012 | 3.14256 | 1.35946 |

**4TS-27**

| Atom | x       | y       | z       |
|------|---------|---------|---------|
| 14   | 1.35824 | -1.5853 | -0.4362 |
| 14   | -1.5394 | -1.3355 | -0.985  |
| 8    | -2.3923 | -2.6318 | -0.5059 |
| 1    | -2.0398 | -3.1607 | 0.2108  |
| 8    | -2.3451 | -0.723  | -2.2289 |
| 1    | -2.1936 | 0.19069 | -2.5098 |
| 8    | 0.77225 | -1.3289 | 1.10525 |
| 1    | -0.341  | -3.4798 | 1.87995 |
| 8    | -1.4187 | -0.2359 | 0.25354 |
| 8    | 2.15541 | -0.215  | -0.7883 |
| 8    | 0.00908 | -1.7593 | -1.3211 |
| 8    | 2.30916 | -2.8748 | -0.5259 |
| 1    | 3.255   | -2.7333 | -0.5998 |
| 8    | -1.242  | -3.7788 | 1.85139 |
| 1    | -1.7024 | -3.2953 | 2.53587 |
| 8    | 5.07362 | -2.281  | -0.9405 |
| 1    | 5.30766 | -1.3845 | -0.6912 |
| 1    | 5.23496 | -2.3436 | -1.872  |
| 14   | 2.18235 | 1.17571 | 0.09462 |
| 8    | 2.93192 | 2.47002 | -0.5278 |
| 1    | 2.34051 | 2.8054  | -1.2031 |
| 8    | 0.68807 | 2.11115 | -1.66   |
| 1    | 0.95901 | 1.88089 | -2.5398 |
| 8    | 3.30187 | 0.84789 | 1.30599 |
| 1    | 3.03533 | 0.20417 | 1.9475  |
| 8    | 5.69311 | 0.44993 | -0.184  |
| 1    | 5.02487 | 0.6024  | 0.48545 |
| 1    | 5.52189 | 1.12121 | -0.8328 |
| 8    | -2.63   | -1.9066 | 3.6041  |
| 1    | -2.0522 | -1.1549 | 3.49175 |
| 1    | -3.4317 | -1.6863 | 3.14724 |
| 8    | -3.6406 | 1.80043 | 1.03874 |
| 1    | -2.9605 | 2.1706  | 1.59321 |
| 1    | -3.2306 | 1.05213 | 0.6181  |
| 8    | -1.8417 | 1.88284 | -2.8321 |
| 1    | -0.9967 | 2.01217 | -2.3817 |
| 1    | -2.4478 | 2.51291 | -2.4499 |
| 8    | -4.5951 | -2.8045 | -2.6084 |
| 1    | -4.0965 | -3.0794 | -1.847  |
| 1    | -4.1437 | -2.0143 | -2.8829 |
| 14   | -0.1805 | -0.0036 | 1.28651 |
| 8    | 0.76104 | 1.2639  | 0.93178 |
| 1    | -0.0712 | 3.35196 | -0.7555 |
| 8    | -0.4625 | 4.03632 | -0.1764 |
| 1    | 0.08668 | 4.80097 | -0.2831 |
| 8    | -0.7433 | 0.16028 | 2.80734 |
| 1    | -0.8197 | 1.07356 | 3.07791 |
| 8    | -1.2749 | 3.01589 | 2.41002 |
| 1    | -0.8265 | 3.27516 | 1.59928 |
| 1    | -1.5298 | 3.82214 | 2.83832 |
| 8    | -3.2773 | 3.83166 | -1.1049 |
| 1    | -2.4114 | 4.07371 | -0.7875 |
| 1    | -3.6175 | 3.21724 | -0.459  |

#### 4R-27

| Atom | x       | y       | z       |
|------|---------|---------|---------|
| 14   | 2.17858 | 0.93618 | -0.8273 |
| 14   | -0.0294 | 1.59193 | 1.07737 |
| 8    | -0.3881 | 3.1746  | 1.04283 |
| 1    | -0.3975 | 3.6144  | 0.19139 |
| 8    | -0.3346 | 1.1109  | 2.57967 |
| 1    | -0.6176 | 0.21515 | 2.79318 |
| 8    | 0.88713 | 1.10333 | -1.8589 |
| 1    | 0.05629 | 3.50567 | -2.1369 |
| 8    | -0.9422 | 0.77099 | -0.0385 |
| 8    | 2.57405 | -0.6243 | -0.8973 |
| 8    | 1.52021 | 1.31982 | 0.6236  |
| 8    | 3.37958 | 1.92384 | -1.2578 |
| 1    | 4.13363 | 1.83896 | -0.6801 |
| 8    | -0.5513 | 4.06133 | -1.6629 |
| 1    | -1.4281 | 3.78667 | -1.9288 |
| 8    | 4.45059 | 0.7756  | 1.22224 |
| 1    | 4.34595 | -0.1703 | 1.3452  |
| 1    | 3.84707 | 1.16473 | 1.84273 |
| 14   | 1.6249  | -1.9919 | -0.9142 |
| 8    | 1.65058 | -2.7933 | 0.4151  |
| 1    | 0.32612 | -3.3298 | 1.14732 |
| 8    | -0.4818 | -3.6609 | 1.61731 |
| 1    | -0.1878 | -4.3837 | 2.1547  |
| 8    | 2.10125 | -2.8563 | -2.2361 |
| 1    | 2.29741 | -2.3446 | -3.0077 |
| 8    | 3.92233 | -2.0375 | 1.84603 |
| 1    | 4.55117 | -2.6636 | 1.51534 |
| 1    | 3.08277 | -2.2864 | 1.43272 |
| 8    | -3.0944 | 2.76005 | -2.3522 |
| 1    | -2.6854 | 1.93499 | -2.6003 |
| 1    | -3.6063 | 2.55248 | -1.5784 |
| 8    | -3.912  | 0.52755 | -0.0584 |
| 1    | -3.9161 | -0.1182 | -0.758  |
| 1    | -2.9899 | 0.70601 | 0.10966 |
| 8    | -1.3754 | -1.3765 | 3.20968 |
| 1    | -0.9931 | -2.1172 | 2.74303 |
| 1    | -2.3059 | -1.3876 | 2.99345 |
| 8    | -0.8708 | 3.82206 | 3.97949 |
| 1    | -0.7863 | 4.00498 | 3.05014 |
| 1    | -0.7663 | 2.87835 | 4.02056 |
| 14   | -0.3956 | 0.16214 | -1.4652 |
| 8    | 0.11225 | -1.3523 | -1.2851 |
| 1    | -1.9876 | -3.6153 | 0.57212 |
| 8    | -2.85   | -3.6218 | 0.13696 |
| 1    | -3.1296 | -4.5274 | 0.13541 |
| 8    | -1.5719 | 0.26792 | -2.5861 |
| 1    | -2.1365 | -0.5003 | -2.6516 |
| 8    | -3.4724 | -1.7895 | -1.9804 |
| 1    | -3.1596 | -2.4378 | -1.3445 |
| 1    | -4.129  | -2.2218 | -2.5098 |
| 8    | -4.088  | -1.602  | 2.04264 |
| 1    | -3.8417 | -2.2894 | 1.43206 |
| 1    | -4.1949 | -0.8144 | 1.51454 |

#### 4TS-28

| Atom | x         | y         | z         |
|------|-----------|-----------|-----------|
| 14   | -0.76212  | -2.409632 | -0.440308 |
| 14   | -1.873538 | 1.020537  | -0.223167 |
| 8    | -3.332161 | 0.960536  | 0.536984  |
| 1    | -3.934889 | 0.284287  | 0.227782  |
| 8    | -1.845292 | 2.474384  | -0.964443 |
| 1    | -1.087576 | 2.7484    | -1.483927 |
| 8    | -0.445601 | -1.60445  | 0.955563  |
| 1    | -4.010916 | -1.847509 | -0.380318 |
| 8    | -0.720726 | 1.075346  | 1.016408  |
| 8    | 0.337368  | -2.096156 | -1.605682 |
| 8    | -1.476348 | -0.2579   | -1.062946 |
| 8    | -2.318307 | -2.778859 | -0.811518 |
| 1    | -2.477274 | -3.704593 | -0.680015 |
| 8    | -4.737387 | -1.490766 | 0.126087  |
| 1    | -4.507955 | -1.670646 | 1.033029  |
| 8    | 2.235583  | -3.02386  | 1.737993  |
| 1    | 1.926677  | -2.282577 | 2.251419  |
| 1    | 1.44881   | -3.394472 | 1.342668  |
| 8    | 1.194414  | -0.722867 | -1.796018 |
| 1    | -0.220363 | -3.947778 | 0.027059  |
| 1    | 0.274334  | -4.388876 | -0.649351 |
| 8    | 0.508161  | 0.250732  | -2.898068 |
| 1    | -0.436002 | 0.254795  | -2.726184 |
| 1    | 2.705535  | -1.017673 | -2.307691 |
| 14   | 3.313241  | -1.350978 | -1.653661 |
| 8    | 4.249025  | -1.894581 | 0.059708  |
| 1    | 4.929105  | -2.549917 | -0.019005 |
| 8    | 3.568504  | -2.28177  | 0.619914  |
| 1    | -3.148973 | -1.173604 | 2.697632  |
| 8    | -2.299561 | -1.519139 | 2.448422  |
| 1    | -3.159568 | -0.286332 | 2.348986  |
| 8    | 0.882292  | 3.672236  | 1.572995  |
| 1    | 1.39624   | 3.241728  | 2.247083  |
| 1    | 0.153792  | 3.089491  | 1.377222  |
| 8    | 0.454141  | 3.158578  | -2.550785 |
| 1    | 0.690181  | 2.292126  | -2.867846 |
| 1    | 1.203716  | 3.472632  | -2.048277 |
| 8    | -4.398239 | 3.789409  | 0.012112  |
| 1    | -4.398788 | 2.930059  | 0.418346  |
| 1    | -3.598756 | 3.771007  | -0.503298 |
| 14   | 0.316143  | -0.16154  | 1.016727  |
| 8    | 1.328035  | -0.064521 | -0.281088 |
| 1    | 3.014005  | 0.825395  | 0.098191  |
| 8    | 3.859659  | 1.129704  | 0.426941  |
| 1    | 4.404619  | 0.350011  | 0.38384   |
| 8    | 1.202974  | -0.239067 | 2.380185  |
| 1    | 1.661603  | 0.522519  | 2.723827  |
| 8    | 2.921565  | 1.989845  | 2.948178  |
| 1    | 3.426157  | 1.783442  | 2.156991  |
| 1    | 3.534873  | 2.110531  | 3.660039  |
| 8    | 2.633349  | 3.878485  | -0.719761 |
| 1    | 3.257853  | 3.184977  | -0.543185 |
| 1    | 2.064688  | 3.924114  | 0.049141  |

#### 4R-28

| Atom | x         | y         | z         |
|------|-----------|-----------|-----------|
| 14   | -0.967894 | -2.037028 | -0.569327 |
| 14   | -1.798467 | 1.014801  | -0.260586 |
| 8    | -3.241496 | 1.018242  | 0.501107  |
| 1    | -3.866238 | 0.315953  | 0.308133  |
| 8    | -1.775444 | 2.333606  | -1.204309 |
| 1    | -0.961105 | 2.675446  | -1.580842 |
| 8    | -0.480409 | -1.487754 | 0.961899  |
| 1    | -4.153108 | -1.77021  | -0.224382 |
| 8    | -0.608823 | 1.155696  | 0.905774  |
| 8    | 0.318468  | -1.950843 | -1.657764 |
| 8    | -1.452394 | -0.360793 | -1.016004 |
| 8    | -2.529908 | -2.534679 | -0.900461 |
| 1    | -2.589305 | -3.469807 | -0.759617 |
| 8    | -4.788764 | -1.328768 | 0.338236  |
| 1    | -4.517468 | -1.54583  | 1.225385  |
| 8    | 1.643121  | -3.552905 | 1.70738   |
| 1    | 1.481377  | -2.825049 | 2.295331  |
| 1    | 0.843063  | -3.620113 | 1.175976  |
| 14   | 1.404922  | -0.763553 | -1.699069 |
| 8    | -0.525142 | -3.691617 | -0.148725 |
| 1    | -0.034535 | -4.100343 | -0.847364 |
| 8    | 0.991674  | 0.356821  | -2.818761 |
| 1    | 0.056396  | 0.349947  | -2.99427  |
| 8    | 2.916541  | -1.228282 | -2.052598 |
| 1    | 3.303508  | -1.870951 | -1.457086 |
| 8    | 3.808469  | -3.093551 | -0.057724 |
| 1    | 4.09236   | -3.960866 | -0.31149  |
| 1    | 3.099133  | -3.223472 | 0.580067  |
| 8    | -3.017449 | -1.154582 | 2.789229  |
| 1    | -2.200471 | -1.504287 | 2.448374  |
| 1    | -3.018388 | -0.241504 | 2.522091  |
| 8    | 0.854577  | 3.655509  | 1.916621  |
| 1    | 1.448656  | 3.201355  | 2.503252  |
| 1    | 0.197829  | 3.017656  | 1.649947  |
| 8    | 0.629537  | 3.232596  | -2.405125 |
| 1    | 1.028003  | 2.404841  | -2.65474  |
| 1    | 1.249347  | 3.659288  | -1.814251 |
| 8    | -4.378316 | 3.739755  | -0.470641 |
| 1    | -4.385544 | 2.966943  | 0.082028  |
| 1    | -3.56952  | 3.638785  | -0.96086  |
| 14   | 0.388379  | -0.125615 | 1.068533  |
| 8    | 1.46342   | -0.088641 | -0.183524 |
| 1    | 3.096933  | 0.890845  | 0.012926  |
| 8    | 3.861411  | 1.439242  | 0.19821   |
| 1    | 4.574394  | 1.060959  | -0.300828 |
| 8    | 1.172919  | -0.14142  | 2.483483  |
| 1    | 1.803733  | 0.534209  | 2.715945  |
| 8    | 3.141895  | 1.914049  | 2.908539  |
| 1    | 3.613657  | 1.825688  | 2.079212  |
| 1    | 3.775203  | 1.820204  | 3.607275  |
| 8    | 2.523567  | 4.142533  | -0.40958  |
| 1    | 3.085348  | 3.384056  | -0.292068 |
| 1    | 1.949938  | 4.152076  | 0.356036  |

#### 4TS-29

| Atom | x         | y         | z         |
|------|-----------|-----------|-----------|
| 14   | -1.595259 | 0.983393  | -0.899849 |
| 14   | 1.140462  | 2.032821  | -0.157391 |
| 8    | 0.905892  | 3.39872   | 0.681731  |
| 1    | 0.002501  | 3.628175  | 0.912851  |
| 8    | 2.549957  | 2.198719  | -0.928922 |
| 1    | 2.916033  | 1.42965   | -1.374011 |
| 8    | -1.365601 | 0.43433   | 0.641751  |
| 1    | -2.182545 | 3.771969  | 0.10547   |
| 8    | 1.229638  | 0.712642  | 0.857614  |
| 8    | -1.533816 | -0.34497  | -1.868585 |
| 8    | -0.109336 | 1.700699  | -1.147168 |
| 8    | -2.649024 | 2.14409   | -1.268901 |
| 1    | -3.506322 | 1.782471  | -1.008396 |
| 8    | -1.907424 | 3.890913  | 1.008898  |
| 1    | -2.525488 | 3.35093   | 1.502034  |
| 8    | -3.427006 | -1.744541 | 1.527592  |
| 1    | -2.670923 | -1.488607 | 2.039581  |
| 1    | -3.609392 | -0.991314 | 0.92544   |
| 14   | -0.482853 | -1.569192 | -1.729045 |
| 8    | -3.950296 | 0.278795  | -0.171943 |
| 1    | -4.626437 | -0.088172 | -0.725983 |
| 8    | 0.715616  | -1.365776 | -2.83283  |
| 1    | 0.531069  | -0.727995 | -3.510035 |
| 8    | -1.09533  | -3.041694 | -1.947924 |
| 1    | -1.773052 | -3.368589 | -1.349715 |
| 8    | -3.030637 | -3.931914 | -0.117923 |
| 1    | -3.881326 | -4.102543 | -0.498411 |
| 1    | -3.163952 | -3.208443 | 0.509098  |
| 8    | -4.02289  | 2.030671  | 1.967925  |
| 1    | -4.127301 | 1.419956  | 1.221794  |
| 1    | -3.771252 | 1.482387  | 2.698097  |
| 8    | 3.752864  | -0.524788 | 2.14647   |
| 1    | 3.284745  | -1.133987 | 2.706347  |
| 1    | 3.105111  | 0.094193  | 1.821818  |
| 8    | 3.384476  | -0.218676 | -2.150502 |
| 1    | 2.595227  | -0.696573 | -2.385821 |
| 1    | 3.874674  | -0.800783 | -1.570465 |
| 8    | 3.396738  | 5.027945  | -0.083563 |
| 1    | 2.576163  | 4.893081  | 0.377228  |
| 1    | 3.506215  | 4.216059  | -0.565767 |
| 14   | 0.00608   | -0.356339 | 0.970491  |
| 8    | 0.196246  | -1.486697 | -0.223669 |
| 1    | 1.300323  | -3.029618 | 0.112609  |
| 8    | 1.899743  | -3.726296 | 0.383442  |
| 1    | 1.598999  | -4.513784 | -0.052286 |
| 8    | -0.106687 | -1.06434  | 2.414424  |
| 1    | 0.57415   | -1.645773 | 2.743519  |
| 8    | 2.044225  | -2.844737 | 3.085439  |
| 1    | 2.080236  | -3.354921 | 2.274961  |
| 1    | 1.973118  | -3.457039 | 3.805471  |
| 8    | 4.468472  | -2.078798 | -0.196031 |
| 1    | 3.793348  | -2.742343 | -0.106137 |
| 1    | 4.401488  | -1.542321 | 0.593225  |



**4R-29**

| Atom | x         | y         | z         |
|------|-----------|-----------|-----------|
| 14   | -1.699113 | 0.287444  | -0.919679 |
| 14   | 0.673479  | 2.08956   | -0.427487 |
| 8    | 0.120453  | 3.467205  | 0.219372  |
| 1    | -0.834778 | 3.584371  | 0.206977  |
| 8    | 1.998513  | 2.453369  | -1.276305 |
| 1    | 2.485756  | 1.740764  | -1.699537 |
| 8    | -1.330633 | -0.081959 | 0.697896  |
| 1    | -2.965838 | 2.728346  | -0.487374 |
| 8    | 1.081436  | 0.983876  | 0.750143  |
| 8    | -1.230433 | -1.128957 | -1.665882 |
| 8    | -0.482499 | 1.342953  | -1.289702 |
| 8    | -3.146619 | 0.766061  | -1.134822 |
| 1    | -4.485797 | 0.458833  | -0.182435 |
| 8    | -2.725813 | 3.435807  | 0.112859  |
| 1    | -3.076967 | 3.160263  | 0.956123  |
| 8    | -3.661307 | -2.005752 | 1.441617  |
| 1    | -2.867086 | -1.482413 | 1.476372  |
| 1    | -4.350038 | -1.386036 | 1.207309  |
| 14   | 0.02819   | -2.082764 | -1.339688 |
| 8    | -5.183556 | 0.269035  | 0.479948  |
| 1    | -6.014372 | 0.470346  | 0.072809  |
| 8    | 1.242699  | -1.981823 | -2.441267 |
| 1    | 1.153228  | -2.521489 | -3.214885 |
| 8    | -0.412673 | -3.638924 | -1.268835 |
| 1    | -1.340453 | -3.812182 | -1.088458 |
| 8    | -3.213699 | -3.608851 | -0.882817 |
| 1    | -3.374483 | -2.916536 | -1.513192 |
| 1    | -3.416606 | -3.21151  | -0.033405 |
| 8    | -3.683061 | 1.859533  | 2.431051  |
| 1    | -4.322089 | 1.372223  | 1.914609  |
| 1    | -2.903201 | 1.318013  | 2.434312  |
| 8    | 3.985757  | 0.772202  | 1.862725  |
| 1    | 3.733927  | 0.177987  | 2.561014  |
| 1    | 3.174201  | 1.132174  | 1.517816  |
| 8    | 3.289651  | 0.196335  | -2.375518 |
| 1    | 2.643804  | -0.492321 | -2.49927  |
| 1    | 3.934921  | -0.157742 | -1.76418  |
| 8    | 2.219881  | 5.479989  | -0.79351  |
| 1    | 1.442553  | 5.230744  | -0.306167 |
| 1    | 2.496064  | 4.660173  | -1.187698 |
| 14   | 0.219767  | -0.358263 | 1.082823  |
| 8    | 0.721687  | -1.565565 | 0.063034  |
| 1    | 2.26568   | -2.597058 | 0.551238  |
| 8    | 3.040548  | -3.03725  | 0.905004  |
| 1    | 2.962224  | -3.949697 | 0.658087  |
| 8    | 0.348843  | -0.819294 | 2.62026   |
| 1    | 1.194753  | -1.034618 | 3.003525  |
| 8    | 3.013743  | -1.63074  | 3.387834  |
| 1    | 3.163627  | -2.261078 | 2.682088  |
| 1    | 3.203744  | -2.066488 | 4.207747  |
| 8    | 4.964967  | -0.932524 | -0.273977 |
| 1    | 4.517253  | -1.719405 | 0.016311  |
| 1    | 4.804368  | -0.28714  | 0.413826  |

**4TS-30**

| Atom | x         | y         | z         |
|------|-----------|-----------|-----------|
| 14   | -1.683917 | 1.030243  | -1.330197 |
| 14   | 1.081586  | 1.932235  | -0.160982 |
| 8    | 0.890055  | 3.261379  | 0.752328  |
| 1    | 0.030792  | 3.389052  | 1.158959  |
| 8    | 2.401043  | 2.188813  | -1.071845 |
| 1    | 2.639929  | 1.462931  | -1.651265 |
| 8    | -1.313521 | 0.28083   | 0.917627  |
| 1    | -2.24373  | 2.824108  | 1.048002  |
| 8    | 1.30268   | 0.57523   | 0.731927  |
| 8    | -1.618229 | -0.573324 | -1.621892 |
| 8    | -0.221398 | 1.697246  | -1.110213 |
| 8    | -2.119662 | 1.667673  | -2.81267  |
| 1    | -1.395737 | 1.920309  | -3.366937 |
| 8    | -1.855852 | 3.357158  | 1.737302  |
| 1    | -1.988259 | 2.835215  | 2.522558  |
| 8    | -4.563098 | -0.202118 | 1.221912  |
| 1    | -4.2071   | -0.040401 | 2.09133   |
| 1    | -4.017537 | 0.337971  | 0.652052  |
| 14   | -0.772808 | -1.909793 | -1.304913 |
| 8    | -2.996811 | 1.601352  | -0.495556 |
| 1    | -3.541739 | 2.117034  | -1.077699 |
| 8    | 0.304741  | -2.222531 | -2.513336 |
| 1    | -0.045    | -2.633667 | -3.291461 |
| 8    | -1.745999 | -3.199392 | -1.205498 |
| 1    | -2.574403 | -3.1085   | -0.728761 |
| 8    | -4.215883 | -2.806409 | 0.157837  |
| 1    | -4.960244 | -2.829751 | -0.427659 |
| 1    | -4.271217 | -1.955241 | 0.603811  |
| 8    | -2.60434  | 0.79767   | 3.228556  |
| 1    | -2.126905 | 0.590715  | 2.407473  |
| 1    | -2.140121 | 0.324848  | 3.906735  |
| 8    | 4.087211  | -0.330047 | 1.537445  |
| 1    | 3.821222  | -0.94278  | 2.214045  |
| 1    | 3.300374  | 0.15583   | 1.303426  |
| 8    | 2.782777  | -0.265429 | -2.583954 |
| 1    | 2.002313  | -0.804391 | -2.664183 |
| 1    | 3.409534  | -0.800884 | -2.096819 |
| 8    | 3.179254  | 5.029789  | -0.269751 |
| 1    | 2.426337  | 4.84179   | 0.279662  |
| 1    | 3.291203  | 4.221739  | -0.758406 |
| 14   | 0.055266  | -0.447891 | 1.110046  |
| 8    | 0.175019  | -1.702784 | 0.004102  |
| 1    | 1.512246  | -3.009672 | 0.178774  |
| 8    | 2.206658  | -3.64946  | 0.358786  |
| 1    | 1.913991  | -4.468159 | -0.019396 |
| 8    | 0.306771  | -1.068467 | 2.599382  |
| 1    | 1.126833  | -1.507231 | 2.799722  |
| 8    | 2.786328  | -2.636822 | 2.956927  |
| 1    | 2.682142  | -3.169745 | 2.167825  |
| 1    | 2.774772  | -3.224929 | 3.699614  |
| 8    | 4.424667  | -1.92947  | -0.85365  |
| 1    | 3.819829  | -2.610004 | -0.577662 |
| 1    | 4.499411  | -1.350407 | -0.095239 |

**4R-30**

| Atom | x         | y         | z         |
|------|-----------|-----------|-----------|
| 14   | -1.63116  | 1.0522    | -1.065902 |
| 14   | 1.252563  | 1.890253  | -0.310786 |
| 8    | 1.263778  | 3.259759  | 0.568103  |
| 1    | 0.428057  | 3.512874  | 0.961749  |
| 8    | 2.583678  | 1.935205  | -1.236733 |
| 1    | 2.751817  | 1.15001   | -1.761661 |
| 8    | -1.276168 | 0.437234  | 0.625734  |
| 1    | -2.005036 | 3.188746  | 0.974156  |
| 8    | 1.346913  | 0.555309  | 0.670567  |
| 8    | -1.604609 | -0.538595 | -1.634305 |
| 8    | -0.108355 | 1.736295  | -1.163536 |
| 8    | -2.189715 | 1.697424  | -2.54958  |
| 1    | -1.594333 | 1.566679  | -3.272189 |
| 8    | -1.465912 | 3.622973  | 1.63159   |
| 1    | -1.639877 | 3.136109  | 2.429839  |
| 8    | -4.66786  | 0.086337  | 1.228871  |
| 1    | -4.307678 | 0.216748  | 2.100251  |
| 1    | -4.157585 | 0.680882  | 0.677579  |
| 14   | -0.855487 | -1.912489 | -1.307412 |
| 8    | -2.941193 | 1.824134  | -0.310961 |
| 1    | -3.419328 | 2.309961  | -0.971457 |
| 8    | 0.223484  | -2.345886 | -2.47554  |
| 1    | -0.130147 | -2.804702 | -3.224648 |
| 8    | -1.87965  | -3.159057 | -1.142216 |
| 1    | -2.734291 | -2.978173 | -0.744914 |
| 8    | -4.432438 | -2.449076 | -0.064206 |
| 1    | -5.005108 | -2.273557 | -0.798618 |
| 1    | -4.458526 | -1.648942 | 0.467827  |
| 8    | -2.492304 | 1.051887  | 3.085342  |
| 1    | -2.157946 | 0.889645  | 2.199861  |
| 1    | -1.941154 | 0.509803  | 3.636237  |
| 8    | 3.979809  | -0.587346 | 1.672175  |
| 1    | 3.573154  | -1.114762 | 2.350765  |
| 1    | 3.296239  | -0.002514 | 1.356296  |
| 8    | 2.827628  | -0.639063 | -2.537531 |
| 1    | 2.010115  | -1.115365 | -2.642125 |
| 1    | 3.378192  | -1.195801 | -1.987388 |
| 8    | 3.774829  | 4.653379  | -0.489402 |
| 1    | 3.001513  | 4.580218  | 0.059034  |
| 1    | 3.761836  | 3.839895  | -0.981574 |
| 14   | 0.043181  | -0.376074 | 0.996785  |
| 8    | 0.097929  | -1.713248 | 0.021269  |
| 1    | 1.259602  | -3.15106  | 0.345206  |
| 8    | 1.875326  | -3.828151 | 0.637042  |
| 1    | 1.516308  | -4.655339 | 0.34373   |
| 8    | 0.031857  | -0.837563 | 2.557071  |
| 1    | 0.747978  | -1.370136 | 2.891311  |
| 8    | 2.292719  | -2.597021 | 3.167862  |
| 1    | 2.224223  | -3.199004 | 2.425177  |
| 1    | 2.381427  | -3.12063  | 3.952538  |
| 8    | 4.252712  | -2.34038  | -0.628238 |
| 1    | 3.603666  | -2.970644 | -0.335254 |
| 1    | 4.349852  | -1.731804 | 0.103652  |

**4TS-31**

| Atom | x         | y         | z         |
|------|-----------|-----------|-----------|
| 14   | -1.595259 | 0.983393  | -0.899849 |
| 14   | 1.140462  | 2.032821  | -0.157391 |
| 8    | 0.905892  | 3.39872   | 0.681731  |
| 1    | 0.002501  | 3.628175  | 0.912851  |
| 8    | 2.549957  | 2.198719  | -0.928922 |
| 1    | 2.916033  | 1.42965   | -1.374011 |
| 8    | -1.365601 | 0.43433   | 0.641751  |
| 1    | -2.182545 | 3.771969  | 0.10547   |
| 8    | 1.229638  | 0.712642  | 0.857614  |
| 8    | -1.533816 | -0.34497  | -1.868585 |
| 8    | -0.109336 | 1.700699  | -1.147168 |
| 8    | -2.649024 | 2.14409   | -1.268901 |
| 1    | -3.506322 | 1.782471  | -1.008396 |
| 8    | -1.907424 | 3.890913  | 1.008898  |
| 1    | -2.525488 | 3.35093   | 1.502034  |
| 8    | -3.427006 | -1.744541 | 1.527592  |
| 1    | -2.670923 | -1.488607 | 2.039581  |
| 1    | -3.609392 | -0.991314 | 0.92544   |
| 14   | -0.482853 | -1.569192 | -1.729045 |
| 8    | -3.950296 | 0.278795  | -0.171943 |
| 1    | -4.626437 | -0.088172 | -0.725983 |
| 8    | 0.715616  | -1.365776 | -2.83283  |
| 1    | 0.531069  | -0.727995 | -3.510035 |
| 8    | -1.09533  | -3.041694 | -1.947924 |
| 1    | -1.773052 | -3.368589 | -1.349715 |
| 8    | -3.030637 | -3.931914 | -0.117923 |
| 1    | -3.881326 | -4.102543 | -0.498411 |
| 1    | -3.163952 | -3.208443 | 0.509098  |
| 8    | -4.02289  | 2.030671  | 1.967925  |
| 1    | -4.127301 | 1.419956  | 1.221794  |
| 1    | -3.771252 | 1.482387  | 2.698097  |
| 8    | 3.752864  | -0.524788 | 2.14647   |
| 1    | 3.284745  | -1.133987 | 2.706347  |
| 1    | 3.105111  | 0.094193  | 1.821818  |
| 8    | 3.384476  | -0.218676 | -2.150502 |
| 1    | 2.595227  | -0.696573 | -2.385821 |
| 1    | 3.874674  | -0.800783 | -1.570465 |
| 8    | 3.396738  | 5.027945  | -0.083563 |
| 1    | 2.576163  | 4.893081  | 0.377228  |
| 1    | 3.506215  | 4.216059  | -0.565767 |
| 14   | 0.00608   | -0.356339 | 0.970491  |
| 8    | 0.196246  | -1.486697 | -0.223669 |
| 1    | 1.300323  | -3.029618 | 0.112609  |
| 8    | 1.899743  | -3.726296 | 0.383442  |
| 1    | 1.598999  | -4.513784 | -0.052286 |
| 8    | -0.106687 | -1.06434  | 2.414424  |
| 1    | 0.57415   | -1.645773 | 2.743519  |
| 8    | 2.044225  | -2.844737 | 3.085439  |
| 1    | 2.080236  | -3.354921 | 2.274961  |
| 1    | 1.973118  | -3.457039 | 3.805471  |
| 8    | 4.468472  | -2.078798 | -0.196031 |
| 1    | 3.793348  | -2.742343 | -0.106137 |
| 1    | 4.401488  | -1.542321 | 0.593225  |

**4R-31**

| Atom | x         | y         | z         |
|------|-----------|-----------|-----------|
| 14   | -1.699113 | 0.287444  | -0.919679 |
| 14   | 0.673479  | 2.08956   | -0.427487 |
| 8    | 0.120453  | 3.467205  | 0.219372  |
| 1    | -0.834778 | 3.584371  | 0.206977  |
| 8    | 1.998513  | 2.453369  | -1.276305 |
| 1    | 2.485756  | 1.740764  | -1.699537 |
| 8    | -1.330633 | -0.081959 | 0.697896  |
| 1    | -2.965838 | 2.728346  | -0.487374 |
| 8    | 1.081436  | 0.983876  | 0.750143  |
| 8    | -1.230433 | -1.128957 | -1.665882 |
| 8    | -0.482499 | 1.342953  | -1.289702 |
| 8    | -3.146619 | 0.766061  | -1.134822 |
| 1    | -4.485797 | 0.458833  | -0.182435 |
| 8    | -2.725813 | 3.435807  | 0.112859  |
| 1    | -3.076967 | 3.160263  | 0.956123  |
| 8    | -3.661307 | -2.005752 | 1.441617  |
| 1    | -2.867086 | -1.482413 | 1.476372  |
| 1    | -4.350038 | -1.386036 | 1.207309  |
| 14   | 0.02819   | -2.082764 | -1.339688 |
| 8    | -5.183556 | 0.269035  | 0.479948  |
| 1    | -6.014372 | 0.470346  | 0.072809  |
| 8    | 1.242699  | -1.981823 | -2.441267 |
| 1    | 1.153228  | -2.521489 | -3.214885 |
| 8    | -0.412673 | -3.638924 | -1.268835 |
| 1    | -1.340453 | -3.812182 | -1.088458 |
| 8    | -3.213699 | -3.608851 | -0.882817 |
| 1    | -3.374483 | -2.916536 | -1.513192 |
| 1    | -3.416606 | -3.211151 | -0.033405 |
| 8    | -3.683061 | 1.859533  | 2.431051  |
| 1    | -4.322089 | 1.372223  | 1.914609  |
| 1    | -2.903201 | 1.318013  | 2.434312  |
| 8    | 3.985757  | 0.772202  | 1.862725  |
| 1    | 3.733927  | 0.177987  | 2.561014  |
| 1    | 3.174201  | 1.132174  | 1.517816  |
| 8    | 3.289651  | 0.196335  | -2.375518 |
| 1    | 2.643804  | -0.492321 | -2.49927  |
| 1    | 3.934921  | -0.157742 | -1.76418  |
| 8    | 2.219881  | 5.479989  | -0.79351  |
| 1    | 1.442553  | 5.230744  | -0.306167 |
| 1    | 2.496064  | 4.660173  | -1.187698 |
| 14   | 0.219767  | -0.358263 | 1.082823  |
| 8    | 0.721687  | -1.565565 | 0.063034  |
| 1    | 2.26568   | -2.597058 | 0.551238  |
| 8    | 3.040548  | -3.03725  | 0.905004  |
| 1    | 2.962224  | -3.949697 | 0.658087  |
| 8    | 0.348843  | -0.819294 | 2.62026   |
| 1    | 1.194753  | -1.034618 | 3.003525  |
| 8    | 3.013743  | -1.63074  | 3.387834  |
| 1    | 3.163627  | -2.261078 | 2.682088  |
| 1    | 3.203744  | -2.066488 | 4.207747  |
| 8    | 4.964967  | -0.932524 | -0.273977 |
| 1    | 4.517253  | -1.719405 | 0.016311  |
| 1    | 4.804368  | -0.28714  | 0.413826  |

**4TS-32**

| Atom | x         | y         | z         |
|------|-----------|-----------|-----------|
| 14   | 2.304819  | -0.156841 | -0.697326 |
| 14   | -0.249903 | -0.341485 | 1.364662  |
| 8    | 0.255069  | -1.348565 | 2.562629  |
| 1    | 1.135157  | -1.669625 | 2.417228  |
| 8    | -1.798071 | -0.08583  | 2.01965   |
| 1    | -2.095889 | -0.781038 | 2.60168   |
| 8    | 2.089722  | 1.500391  | -0.569622 |
| 8    | 0.16974   | 1.25131   | 1.214552  |
| 8    | 1.224632  | -0.606501 | -1.877635 |
| 8    | 1.770602  | -0.771785 | 0.673172  |
| 8    | 3.806442  | -0.488288 | -1.183233 |
| 1    | 4.503149  | -0.014992 | -0.73314  |
| 14   | -0.343405 | -0.293103 | -1.578238 |
| 8    | -0.725123 | -0.944023 | -0.120337 |
| 8    | -1.342709 | -0.772958 | -2.7351   |
| 1    | -2.08076  | -1.338891 | -2.509388 |
| 14   | 0.592914  | 1.996153  | -0.17897  |
| 8    | -0.422333 | 1.343648  | -1.314551 |
| 8    | 0.430531  | 3.5898    | -0.048675 |
| 1    | -0.160736 | 4.084809  | -0.616508 |
| 8    | -2.236796 | -2.750195 | 3.263151  |
| 1    | -1.304684 | -2.63522  | 3.4136    |
| 1    | -2.290525 | -3.198688 | 2.422908  |
| 8    | -4.079878 | -0.155065 | 0.081563  |
| 1    | -3.374587 | -0.180926 | 0.728018  |
| 1    | -4.05028  | 0.721779  | -0.29041  |
| 8    | -1.651738 | 4.962299  | -1.449042 |
| 1    | -1.968367 | 5.728177  | -0.989894 |
| 1    | -2.326451 | 4.288862  | -1.355741 |
| 8    | -3.092343 | 2.573711  | -0.762552 |
| 1    | -2.332219 | 2.097791  | -1.088538 |
| 1    | -2.936743 | 2.691346  | 0.177398  |
| 8    | 3.432034  | 0.355362  | 2.684736  |
| 1    | 2.873751  | -0.089712 | 2.039971  |
| 1    | 2.850023  | 0.920634  | 3.174735  |
| 8    | -1.846028 | -3.545174 | 0.402587  |
| 1    | -1.577763 | -2.663005 | 0.154954  |
| 1    | -2.496657 | -3.780682 | -0.248603 |
| 8    | 5.065744  | 1.480774  | 0.559875  |
| 1    | 4.712373  | 1.172658  | 1.393446  |
| 1    | 4.419316  | 2.093881  | 0.230144  |
| 8    | 1.533318  | -3.795932 | -2.838037 |
| 1    | 1.580414  | -2.853957 | -2.944815 |
| 1    | 1.550012  | -3.935166 | -1.894572 |
| 8    | -3.60481  | -2.22097  | -1.744773 |
| 1    | -3.870663 | -1.54566  | -1.111126 |
| 1    | -4.337448 | -2.353041 | -2.330767 |
| 8    | 1.31705   | -3.771901 | 0.149823  |
| 1    | 1.49767   | -2.848938 | 0.313307  |
| 1    | 0.380019  | -3.886506 | 0.266783  |
| 8    | -2.392765 | 2.728363  | 2.010233  |
| 1    | -1.513961 | 3.087457  | 2.024161  |
| 1    | -2.264418 | 1.79476   | 2.186057  |

**4R-32**

| Atom | x         | y         | z         |
|------|-----------|-----------|-----------|
| 14   | 2.188472  | -0.589199 | -0.694014 |
| 14   | -0.155638 | -0.297634 | 1.333196  |
| 8    | 0.048036  | -1.347903 | 2.61475   |
| 1    | 0.828708  | -1.877609 | 2.53809   |
| 8    | -1.637368 | 0.277372  | 2.022875  |
| 1    | -2.021618 | -0.305356 | 2.668972  |
| 8    | 2.340041  | 1.065902  | -0.651346 |
| 8    | 0.442535  | 1.26485   | 1.145258  |
| 8    | 1.063187  | -0.881034 | -1.866659 |
| 8    | 1.48676   | -0.981855 | 0.707581  |
| 8    | 3.587517  | -1.303031 | -1.036142 |
| 1    | 4.366534  | -0.916237 | -0.639079 |
| 14   | -0.421157 | -0.248333 | -1.586831 |
| 8    | -0.892378 | -0.780723 | -0.117599 |
| 8    | -1.488408 | -0.557298 | -2.741116 |
| 1    | -2.327555 | -0.950418 | -2.500888 |
| 14   | 0.967343  | 1.869595  | -0.271817 |
| 8    | -0.16008  | 1.378495  | -1.384343 |
| 8    | 1.153192  | 3.464121  | -0.230233 |
| 1    | 0.598705  | 4.056226  | -0.739339 |
| 8    | -2.603925 | -2.324684 | 3.39266   |
| 1    | -1.65359  | -2.292774 | 3.427952  |
| 1    | -2.80067  | -2.714858 | 2.545898  |
| 8    | -3.959555 | 0.577671  | 0.20678   |
| 1    | -3.230428 | 0.418921  | 0.809105  |
| 1    | -3.807239 | 1.446995  | -0.151053 |
| 8    | -0.760423 | 5.198235  | -1.4554   |
| 1    | -0.90653  | 5.990983  | -0.957546 |
| 1    | -1.532205 | 4.646001  | -1.32236  |
| 8    | -2.547308 | 3.101042  | -0.693123 |
| 1    | -1.91455  | 2.48259   | -1.049263 |
| 1    | -2.338779 | 3.175432  | 0.241849  |
| 8    | 3.448375  | -0.12347  | 2.686208  |
| 1    | 2.785158  | -0.469697 | 2.088233  |
| 1    | 3.009755  | 0.552968  | 3.185041  |
| 8    | -2.519676 | -3.074252 | 0.451054  |
| 1    | -2.084331 | -2.249603 | 0.24202   |
| 1    | -3.212651 | -3.139224 | -0.196258 |
| 8    | 5.247309  | 0.508685  | 0.485296  |
| 1    | 4.856909  | 0.3489    | 1.34309   |
| 1    | 4.748767  | 1.228821  | 0.116973  |
| 8    | 0.70937   | -4.073996 | -2.892052 |
| 1    | 0.931347  | -3.153861 | -2.962631 |
| 1    | 0.621259  | -4.234158 | -1.956254 |
| 8    | -3.987892 | -1.47568  | -1.677831 |
| 1    | -4.07756  | -0.773994 | -1.022432 |
| 1    | -4.763004 | -1.446471 | -2.221711 |
| 8    | 0.334983  | -4.069521 | 0.088581  |
| 1    | 0.719871  | -3.222938 | 0.285643  |
| 1    | -0.603648 | -3.963595 | 0.215101  |
| 8    | -1.764557 | 3.107743  | 2.050061  |
| 1    | -0.839468 | 3.319294  | 2.054301  |
| 1    | -1.777341 | 2.156323  | 2.187017  |

**4TS-33**

| Atom | x         | y         | z         |
|------|-----------|-----------|-----------|
| 14   | 1.528507  | -1.89152  | 0.946688  |
| 14   | 0.55781   | 0.286709  | -0.651723 |
| 8    | 1.220754  | 1.412844  | -1.594639 |
| 1    | 2.164538  | 1.498907  | -1.479011 |
| 8    | -1.67478  | 2.232894  | -1.320269 |
| 1    | -1.69303  | 2.859916  | -2.032974 |
| 8    | 0.524694  | -2.832193 | 0.041286  |
| 8    | -0.350432 | -0.853455 | -1.40549  |
| 8    | 0.578189  | -1.3192   | 2.155777  |
| 8    | 1.842293  | -0.592233 | -0.018823 |
| 8    | 2.845929  | -2.620083 | 1.483973  |
| 1    | 3.619907  | -2.66938  | 0.919483  |
| 14   | -0.767169 | -0.472954 | 1.73698   |
| 8    | -0.247532 | 0.693132  | 0.712078  |
| 8    | -1.60383  | 0.08016   | 2.979235  |
| 1    | -1.885223 | 0.999529  | 2.979669  |
| 14   | -0.85534  | -2.164317 | -0.540812 |
| 8    | -1.621702 | -1.518548 | 0.773561  |
| 8    | -1.732175 | -3.193966 | -1.38737  |
| 1    | -2.690089 | -3.242908 | -1.347821 |
| 8    | 0.921033  | 4.404272  | -2.058773 |
| 1    | 0.77945   | 3.462257  | -2.110243 |
| 1    | 0.293011  | 4.692191  | -1.404927 |
| 8    | -3.778803 | 2.435635  | 0.338826  |
| 1    | -3.043443 | 2.415893  | -0.31233  |
| 1    | -4.252538 | 1.620018  | 0.221564  |
| 8    | -4.555373 | -3.179502 | -1.397394 |
| 1    | -4.858402 | -3.063113 | -2.287987 |
| 1    | -4.708702 | -2.340673 | -0.955397 |
| 8    | -4.373054 | -0.594778 | -0.28805  |
| 1    | -3.658644 | -0.790192 | 0.309732  |
| 1    | -3.943956 | -0.282003 | -1.093079 |
| 8    | 6.148134  | -0.001923 | -0.816583 |
| 1    | 5.472026  | 0.645009  | -0.60504  |
| 1    | 6.565107  | 0.294831  | -1.613413 |
| 8    | -0.402211 | 3.797932  | 0.565767  |
| 1    | -0.821922 | 3.175307  | -0.055877 |
| 1    | -0.859693 | 3.666352  | 1.388163  |
| 8    | 4.955242  | -2.606398 | -0.423485 |
| 1    | 5.415837  | -1.771011 | -0.511417 |
| 1    | 4.569267  | -2.780381 | -1.271583 |
| 8    | 3.841968  | 1.51446   | -0.228867 |
| 1    | 3.366036  | 0.814781  | 0.209508  |
| 1    | 3.526787  | 2.342718  | 0.145422  |
| 8    | -2.455093 | 2.737928  | 2.695699  |
| 1    | -2.98871  | 2.660498  | 1.888934  |
| 1    | -2.981674 | 3.205566  | 3.328955  |
| 8    | 2.500247  | 3.913397  | 0.421426  |
| 1    | 2.382438  | 4.284051  | -0.448689 |
| 1    | 1.595401  | 3.774884  | 0.7066    |
| 8    | -2.96973  | 0.248304  | -2.543466 |
| 1    | -2.27891  | -0.350626 | -2.794733 |
| 1    | -2.488323 | 0.997282  | -2.124732 |

4R-33

| Atom | x         | y         | z         |
|------|-----------|-----------|-----------|
| 14   | 0.947064  | -2.216895 | 0.758854  |
| 14   | 0.186403  | 0.183146  | -0.614877 |
| 8    | 0.614432  | 1.386834  | -1.498841 |
| 1    | -0.637772 | 2.563909  | -1.898449 |
| 8    | -1.393361 | 3.154705  | -2.055782 |
| 1    | -1.030951 | 3.984784  | -2.334225 |
| 8    | -0.355886 | -2.938671 | 0.042093  |
| 8    | -1.087948 | -0.749211 | -1.20333  |
| 8    | 0.312921  | -1.543483 | 2.123055  |
| 8    | 1.319477  | -0.964839 | -0.231115 |
| 8    | 2.170365  | -3.198261 | 1.060606  |
| 1    | 2.893207  | -3.239191 | 0.427376  |
| 14   | -0.912782 | -0.468348 | 1.947755  |
| 8    | -0.389328 | 0.645496  | 0.878199  |
| 8    | -1.438917 | 0.207967  | 3.30555   |
| 1    | -1.327047 | 1.159133  | 3.348461  |
| 14   | -1.653006 | -2.009824 | -0.302332 |
| 8    | -2.0911   | -1.298133 | 1.129876  |
| 8    | -2.827587 | -2.841085 | -1.002899 |
| 1    | -3.609983 | -2.408178 | -1.347758 |
| 8    | 3.170574  | 1.600019  | -2.414294 |
| 1    | 2.252141  | 1.487013  | -2.119175 |
| 1    | 3.131493  | 1.825383  | -3.333292 |
| 8    | -2.762337 | 3.443787  | 0.63067   |
| 1    | -2.279441 | 3.421846  | -0.193333 |
| 1    | -3.365339 | 2.704756  | 0.592867  |
| 8    | -5.013973 | -1.258558 | -1.951034 |
| 1    | -4.585304 | -0.599782 | -2.490831 |
| 1    | -5.321479 | -0.781398 | -1.187998 |
| 8    | -4.178767 | 0.872423  | 0.140744  |
| 1    | -3.664367 | 0.250991  | 0.646659  |
| 1    | -3.774007 | 0.902192  | -0.724454 |
| 8    | 5.004949  | -0.525438 | -1.411989 |
| 1    | 5.248954  | -0.124934 | -0.578591 |
| 1    | 4.36922   | 0.074176  | -1.796921 |
| 8    | 1.217636  | 3.458371  | 0.531243  |
| 1    | 0.99653   | 2.802175  | -0.129731 |
| 1    | 0.717249  | 3.211861  | 1.302501  |
| 8    | 4.117689  | -3.165757 | -0.957147 |
| 1    | 4.421538  | -2.265151 | -1.113288 |
| 1    | 3.763124  | -3.466955 | -1.782399 |
| 8    | 5.285585  | 0.917277  | 1.122247  |
| 1    | 4.614626  | 0.534394  | 1.671914  |
| 1    | 4.931704  | 1.757397  | 0.821811  |
| 8    | -1.04562  | 3.027171  | 2.83108   |
| 1    | -1.617919 | 3.174592  | 2.070764  |
| 1    | -1.173253 | 3.7696    | 3.405832  |
| 8    | 4.05988   | 3.205819  | -0.073239 |
| 1    | 3.87924   | 2.814596  | -0.924611 |
| 1    | 3.200379  | 3.42033   | 0.286354  |
| 8    | -3.060064 | 0.837552  | -2.572879 |
| 1    | -2.30736  | 0.287117  | -2.360993 |
| 1    | -2.701663 | 1.714349  | -2.692599 |
